# Supplementary material
Source: PubMed Central journal article supplement (PMC2748116)
Supplement: NIHMS104939-supplement-1_si_001.pdf [file NIHMS104939-supplement-1_si_001.pdf]

## SUPPORTING INFORMATION

### Catalytic Asymmetric Synthesis Using Feedstocks. An Enantioselective Route to 2-Arylpropionic Acids and 2-Arylethyl Amines via Hydrovinylation of Vinylarenes

Craig R. Smith and T. V. RajanBabu\*

*Department of Chemistry, The Ohio State University, 100 W 18<sup>th</sup> Avenue, Columbus, OH 43210*

**General methods.** Reactions requiring air-sensitive manipulations were conducted under an inert atmosphere of nitrogen using Schlenk techniques or in a Vacuum Atmospheres glovebox. Methylene chloride was distilled from calcium hydride under a dry atmosphere and stored over molecular sieves. Tetrahydrofuran was distilled under nitrogen from sodium/benzophenone ketyl. Olefins were made from Wittig reactions of the corresponding aldehydes with triphenylphosphonium bromide in the presence of *n*-BuLi in THF at reflux or via a palladacycle-mediated Heck reaction<sup>1</sup> of the corresponding aryl bromide with ethylene. Na<sup>+</sup>[[3,5-(CF<sub>3</sub>)<sub>2</sub>C<sub>6</sub>H<sub>3</sub>]<sub>4</sub>B]<sup>-</sup> (NaBARF) and ligand<sup>2,3</sup> were prepared according to the literature. Ethylene (99.5%) was purchased from Matheson Inc., and passed through Drierite® before use. Analytical TLC was performed on precoated (0.25 mm) silica gel 60 F254 plates (olefins stained with KMnO<sub>4</sub>; acids stained with bromocresol green). Flash column chromatography was carried out on silica gel 40. All chiral stationary phase gas chromatographic separations of the 2-arylpropionic acids were achieved via conversion of the acid to the (*L*)-menthyl ester. Enantiomeric excesses of chiral compounds **2**, **3**, **5**, **6**, and **7** were determined by chiral stationary phase gas chromatographic analyses, which were performed with Cyclodex B (25 m x 0.25 mm, 0.12 mm film thickness) capillary GC column. Enantiomeric excesses of chiral compounds **9**, **11**, **13** and **14** were determined by gas chromatographic analyses via the corresponding (*L*)-(-)-menthyl esters, which were performed on a chromatograph equipped with Chirasil-(*S*)-Val on WCOT fused silica (50 m x 0.25 mm, 0.12 mm film thickness) capillary GC column. Enantiomeric excess of compound **4** was determined by HPLC using a Daicel Chiralcel OJ-H column using hexane/isopropanol as solvents where base-line separation was obtained. Optical rotations were recorded the sodium D line in chloroform.

1. Herrmann, W. A.; Böhm, V. P. W.; Reisinger, C-P. *J. Organomet. Chem.* **1999**, 576, 23.
2. Smith, C. R.; Zhang, A.; Mans, D.; RajanBabu, T. V. *Org. Synth.* **2008**, 85, 248.
3. (a) Kobayashi, H.; Sonoda, A.; Iwamoto, H.; Yoshimura, M. *Chem. Lett.* **1981**, 10, 579. (b) Brookhart, M.; Grant, B.; Volpe, A. F., Jr. *Organometallics*, **1992**, 11, 3920-3922.

## **$^1\text{H}$ and $^{13}\text{C}$ NMR Spectra and Chromatograms of Key Compounds**

|                                                                                |         |
|--------------------------------------------------------------------------------|---------|
| $^1\text{H}$ NMR, $^{13}\text{C}$ NMR of <b>2</b>                              | S3-S4   |
| $^1\text{H}$ NMR, $^{13}\text{C}$ NMR of <b>3</b>                              | S5-S6   |
| $^1\text{H}$ NMR, $^{13}\text{C}$ NMR of <b>4</b>                              | S7-S8   |
| $^1\text{H}$ NMR, $^{13}\text{C}$ NMR of <b>5</b>                              | S9-S10  |
| $^1\text{H}$ NMR, $^{13}\text{C}$ NMR of <b>6</b>                              | S11-S12 |
| $^1\text{H}$ NMR, $^{13}\text{C}$ NMR of <b>7</b>                              | S13-S14 |
| Gas chromatogram of racemic and enriched <b>7</b>                              | S15-S16 |
| $^1\text{H}$ NMR, $^{13}\text{C}$ NMR of <b>9</b>                              | S17-S18 |
| Gas chromatogram of racemic and enriched <i>L</i> -menthyl esters of <b>9</b>  | S19-S20 |
| $^1\text{H}$ NMR, $^{13}\text{C}$ NMR of <b>11</b>                             | S21-S22 |
| Gas chromatogram of racemic and enriched <i>L</i> -menthyl esters of <b>11</b> | S23-S24 |
| $^1\text{H}$ NMR, $^{13}\text{C}$ NMR of <b>12</b>                             | S25-S26 |
| $^1\text{H}$ NMR, $^{13}\text{C}$ NMR of <b>13</b>                             | S27-S28 |
| Gas chromatogram of racemic and enriched <i>L</i> -menthyl esters of <b>13</b> | S29-S30 |
| $^1\text{H}$ NMR, $^{13}\text{C}$ NMR of <b>14</b>                             | S31-S32 |
| Gas chromatogram of racemic and enriched <i>L</i> -menthyl esters of <b>14</b> | S33-S34 |
| $^1\text{H}$ NMR, $^{13}\text{C}$ NMR of <b>17</b>                             | S35-S36 |
| $^1\text{H}$ NMR, $^{13}\text{C}$ NMR of <b>15</b>                             | S37-S38 |
| $^1\text{H}$ NMR, $^{13}\text{C}$ NMR of <b>18</b>                             | S39-S40 |
| $^1\text{H}$ NMR, $^{13}\text{C}$ NMR of <b>20</b>                             | S41-S42 |
| $^1\text{H}$ NMR, $^{13}\text{C}$ NMR of <b>21</b>                             | S43-S44 |
| $^1\text{H}$ NMR, $^{13}\text{C}$ NMR of <b>19</b>                             | S45-S46 |
| $^1\text{H}$ NMR, $^{13}\text{C}$ NMR of <b>22</b>                             | S47-S48 |
| Chromatogram of racemic and enriched <b>22</b>                                 | S49-S50 |

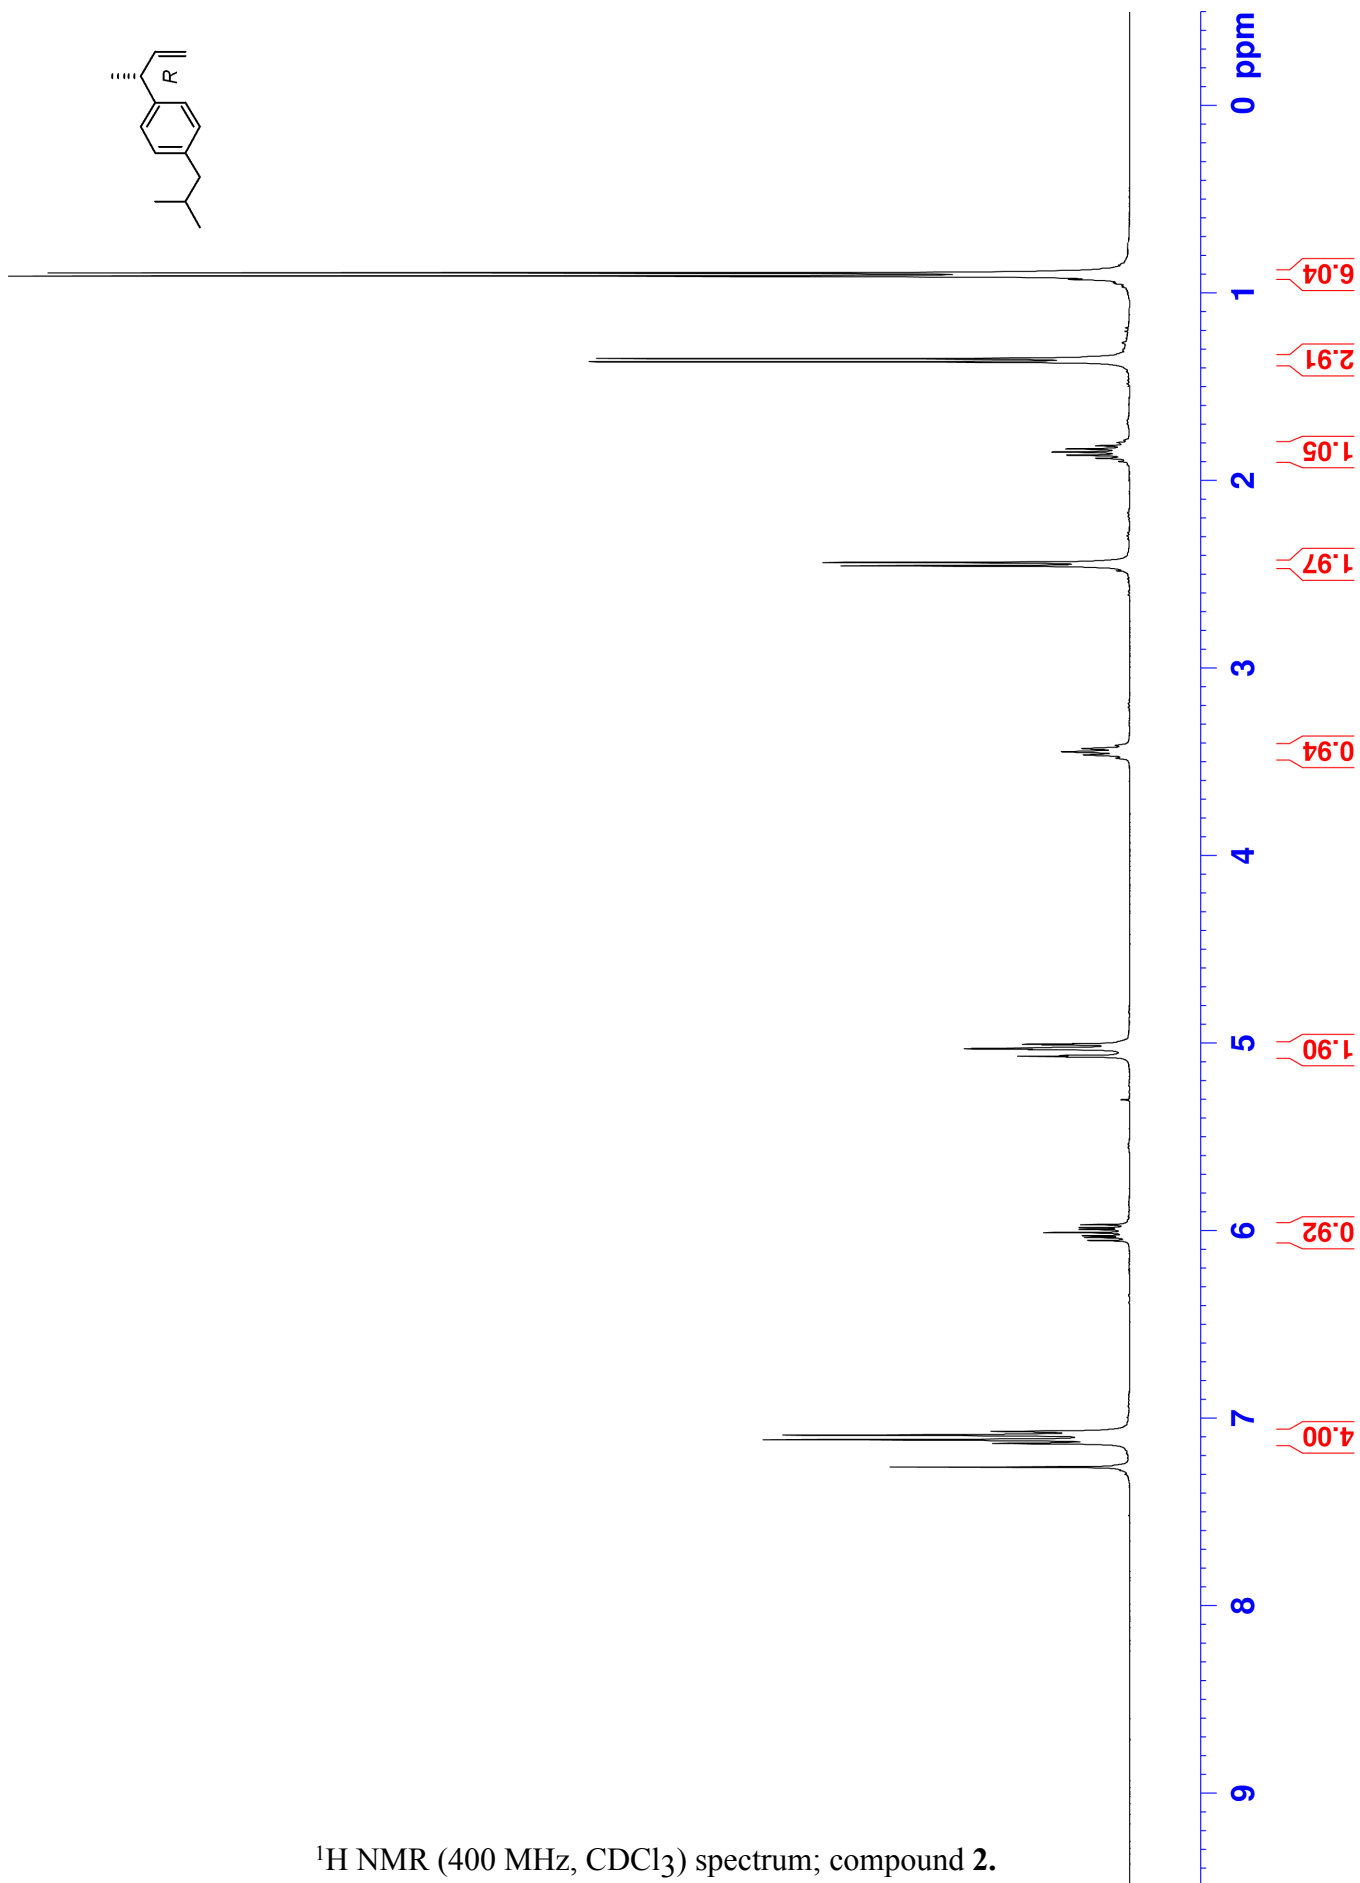

<sup>1</sup>H NMR (400 MHz, CDCl<sub>3</sub>) spectrum; compound 2.

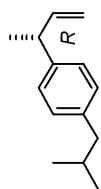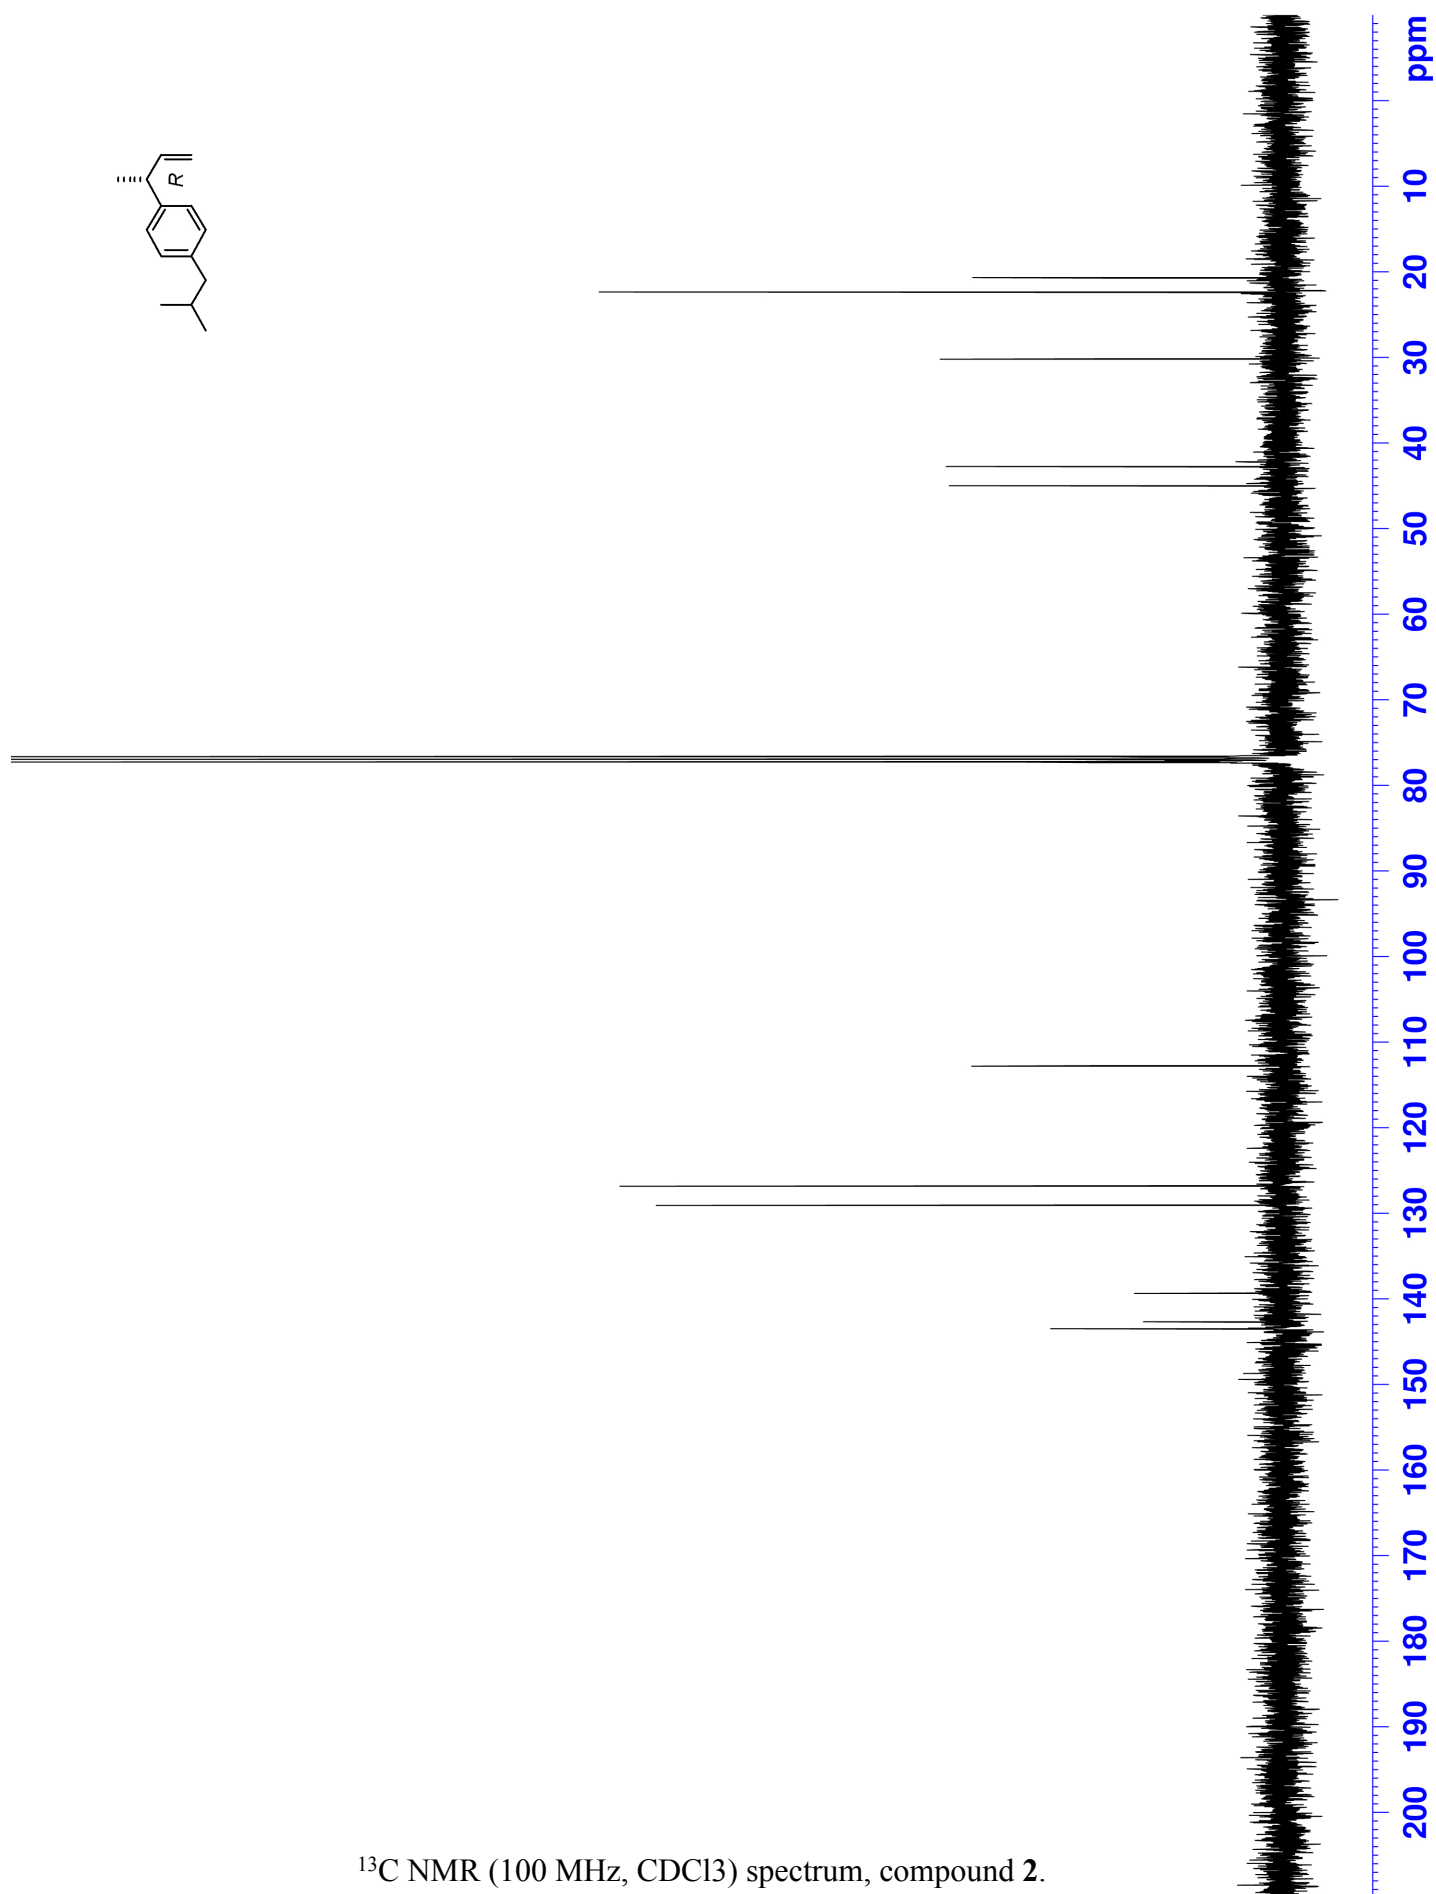

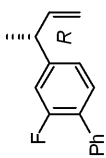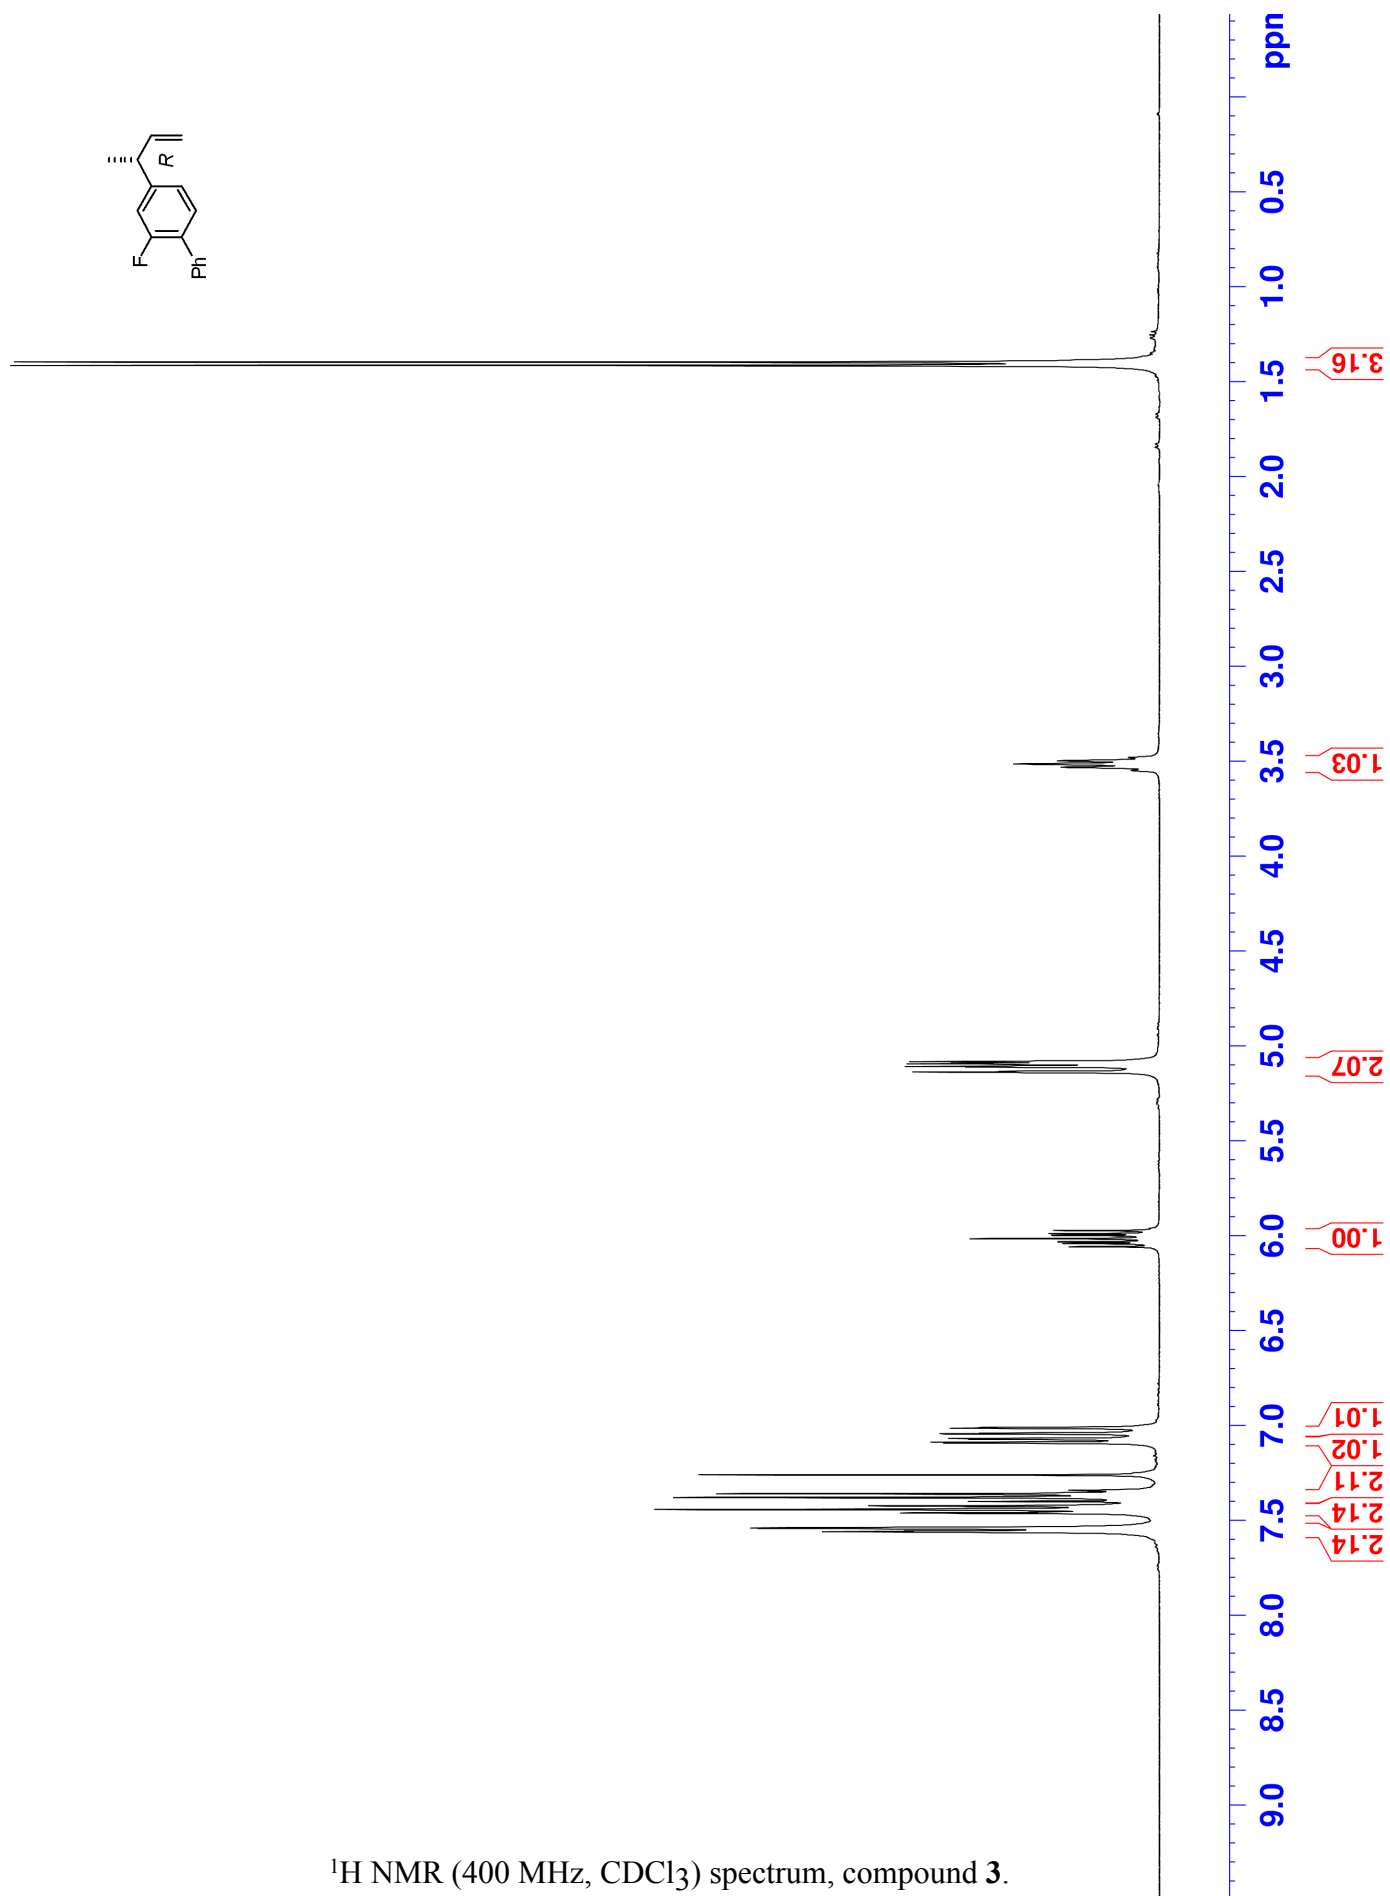

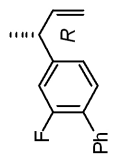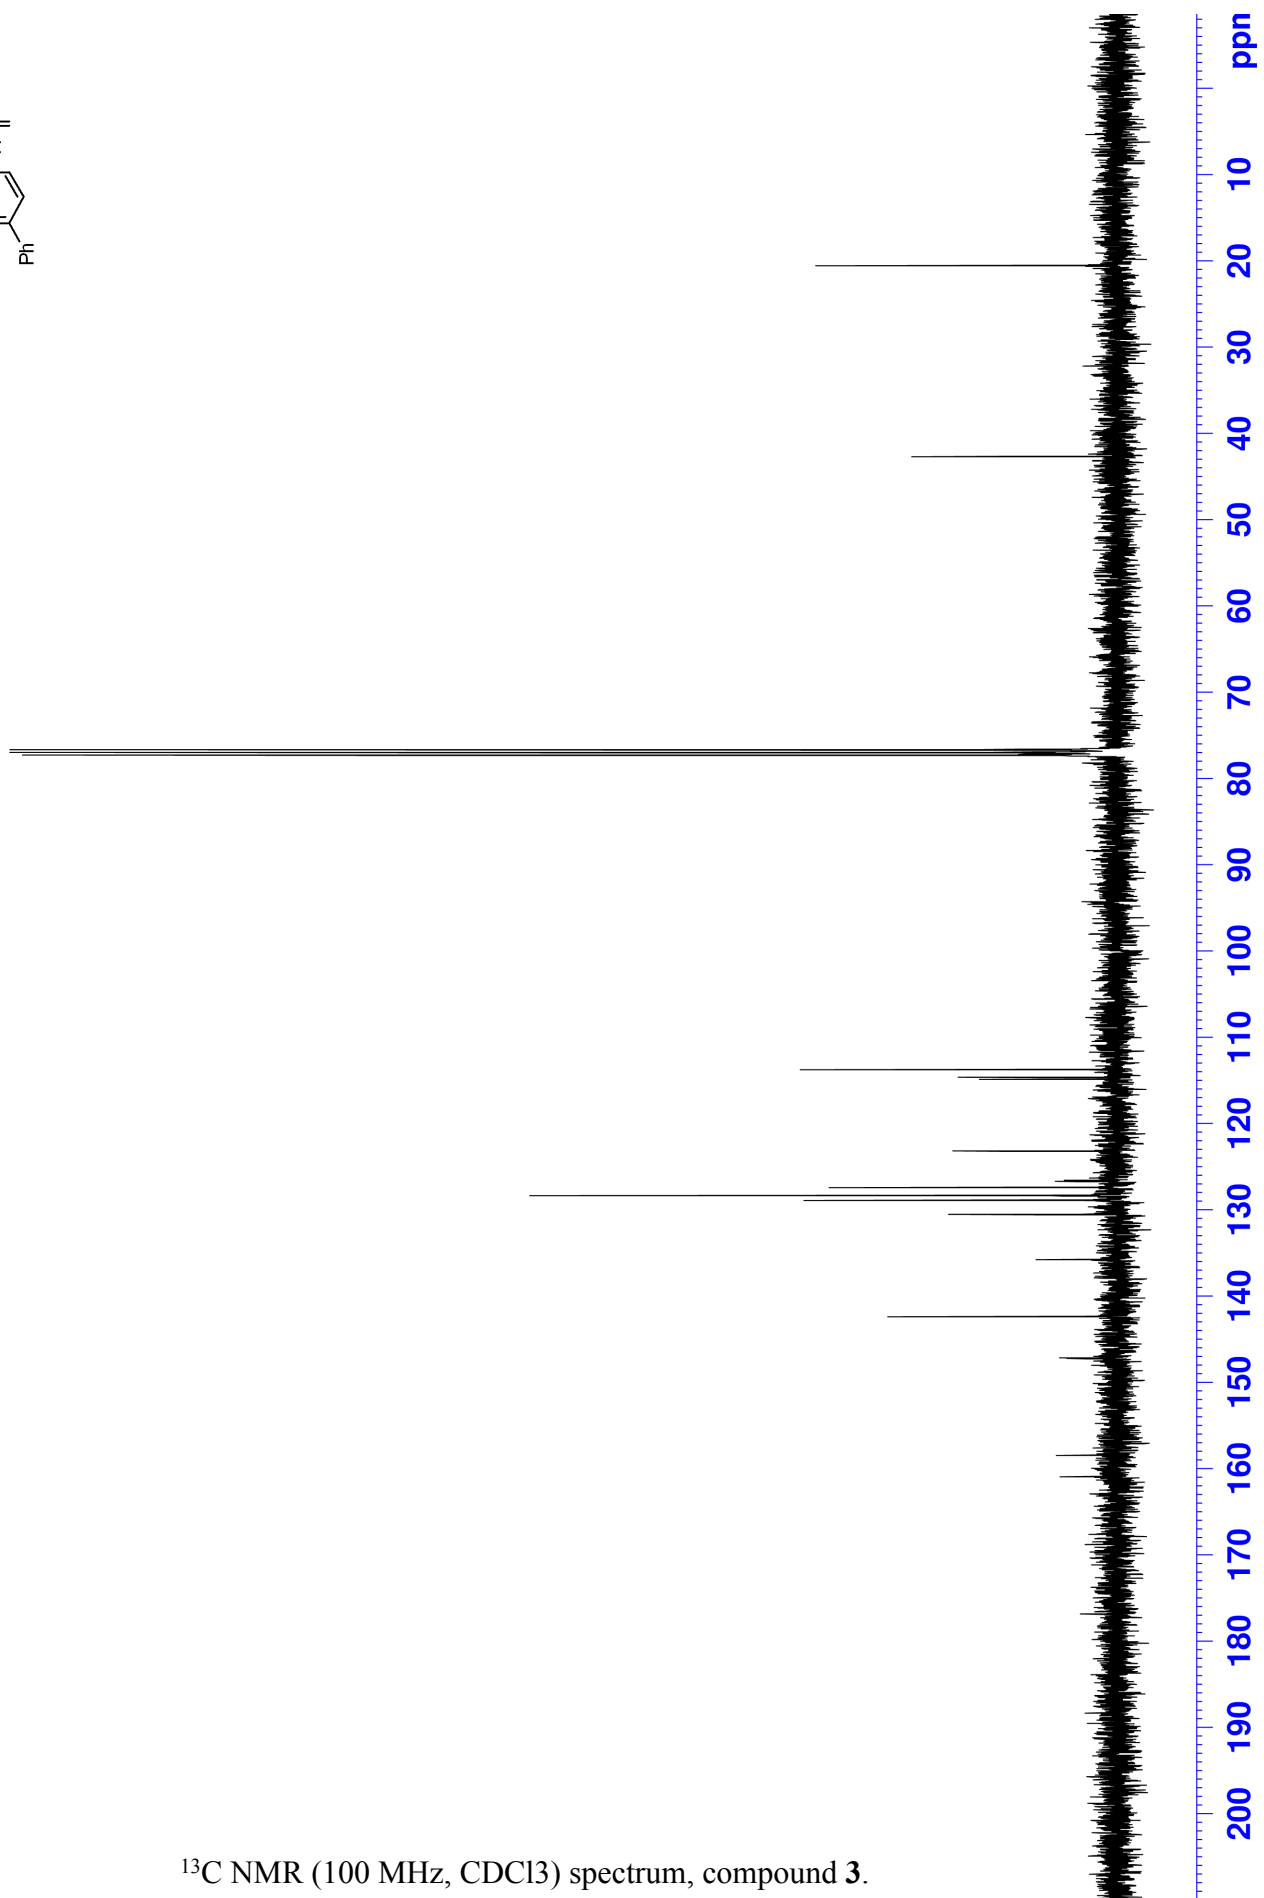

$^{13}\text{C}$  NMR (100 MHz, CDCl<sub>3</sub>) spectrum, compound 3.

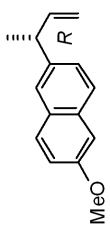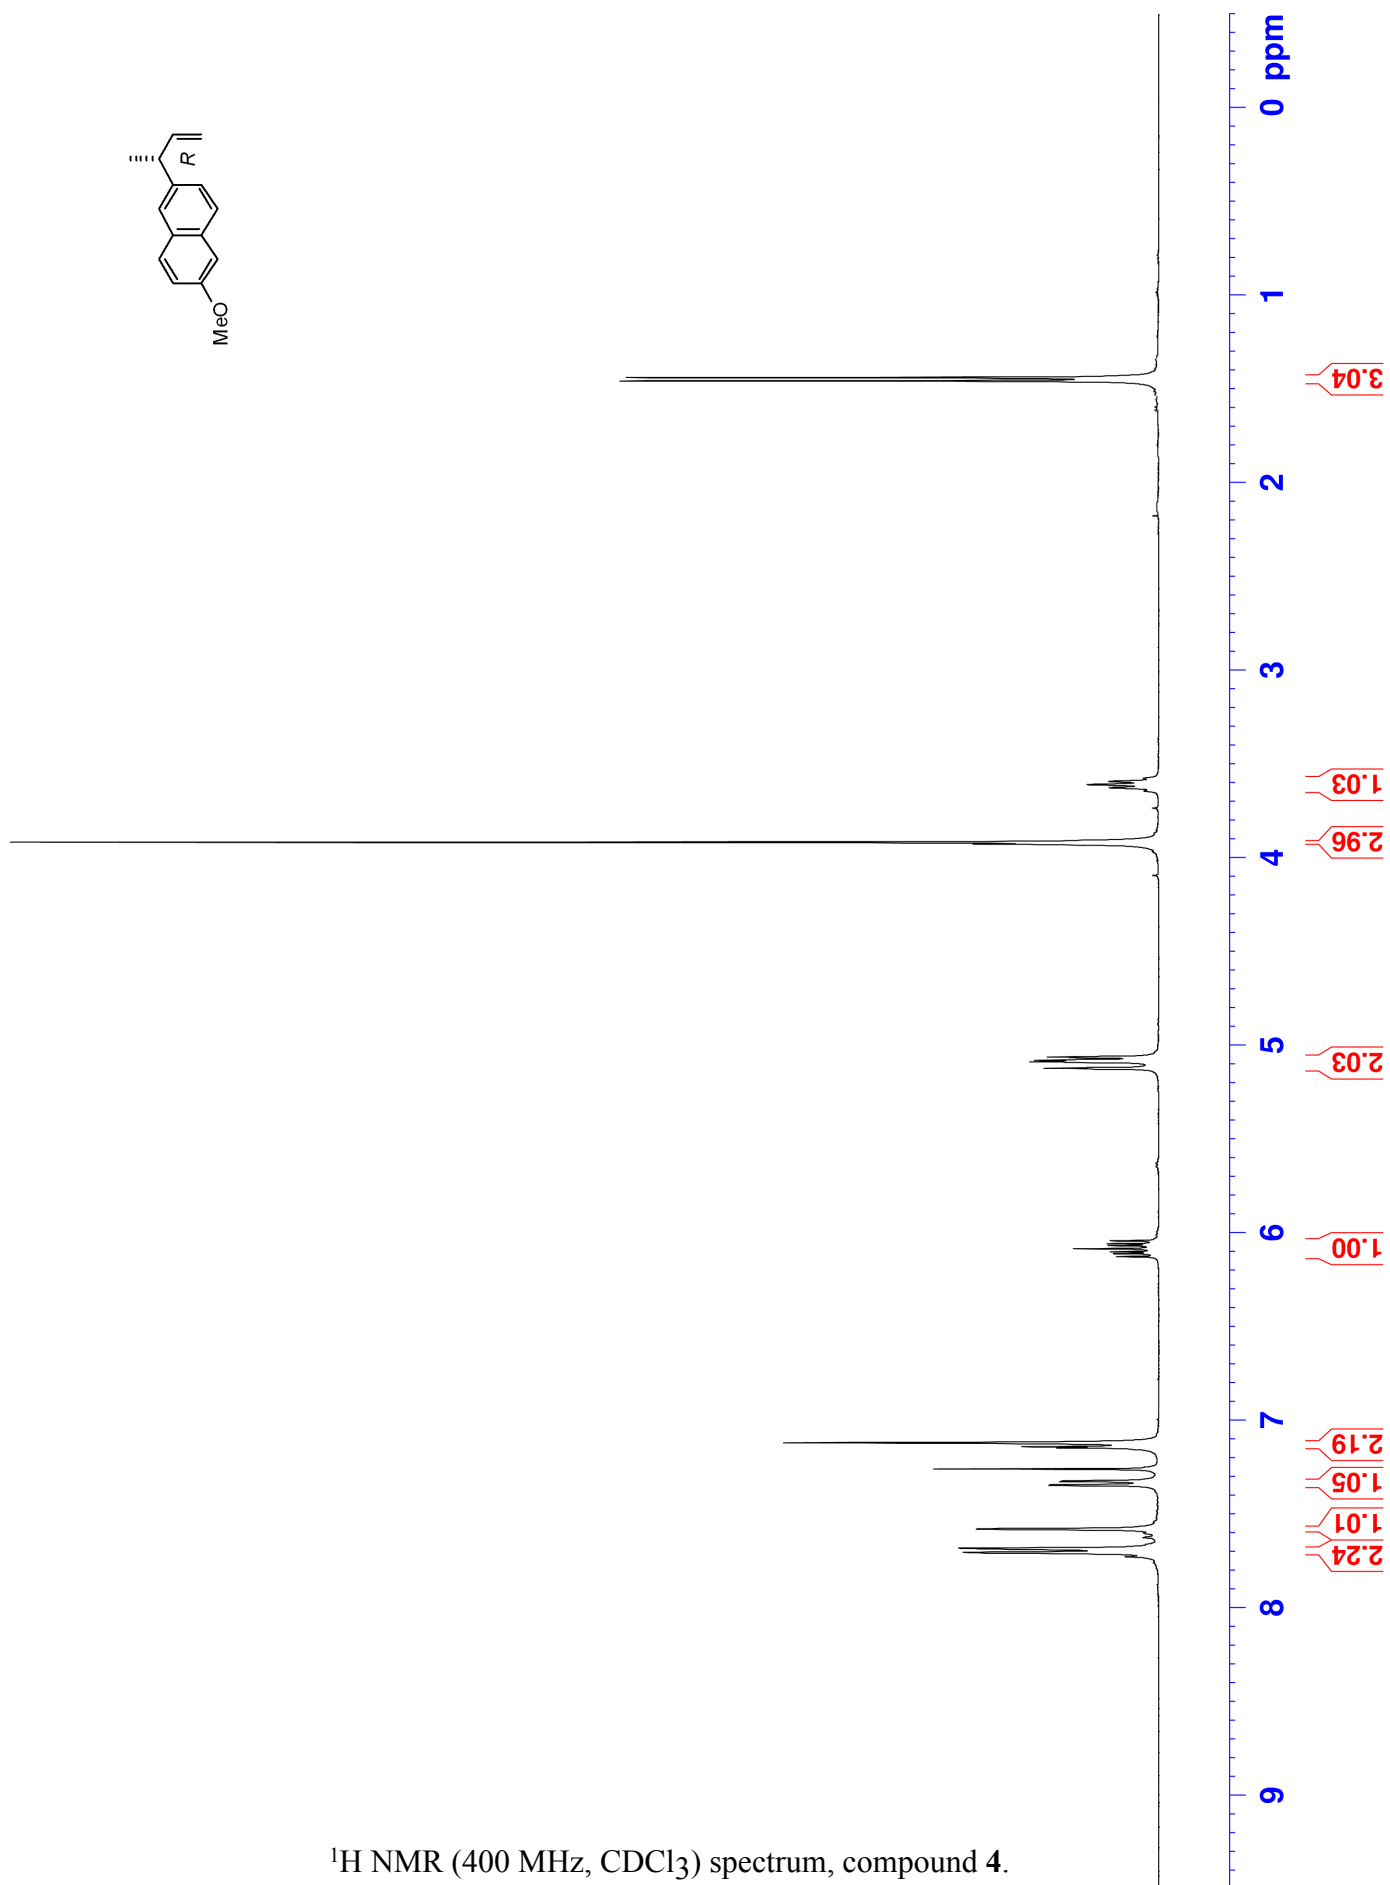

<sup>1</sup>H NMR (400 MHz, CDCl<sub>3</sub>) spectrum, compound 4.

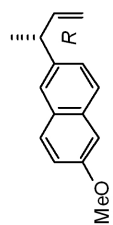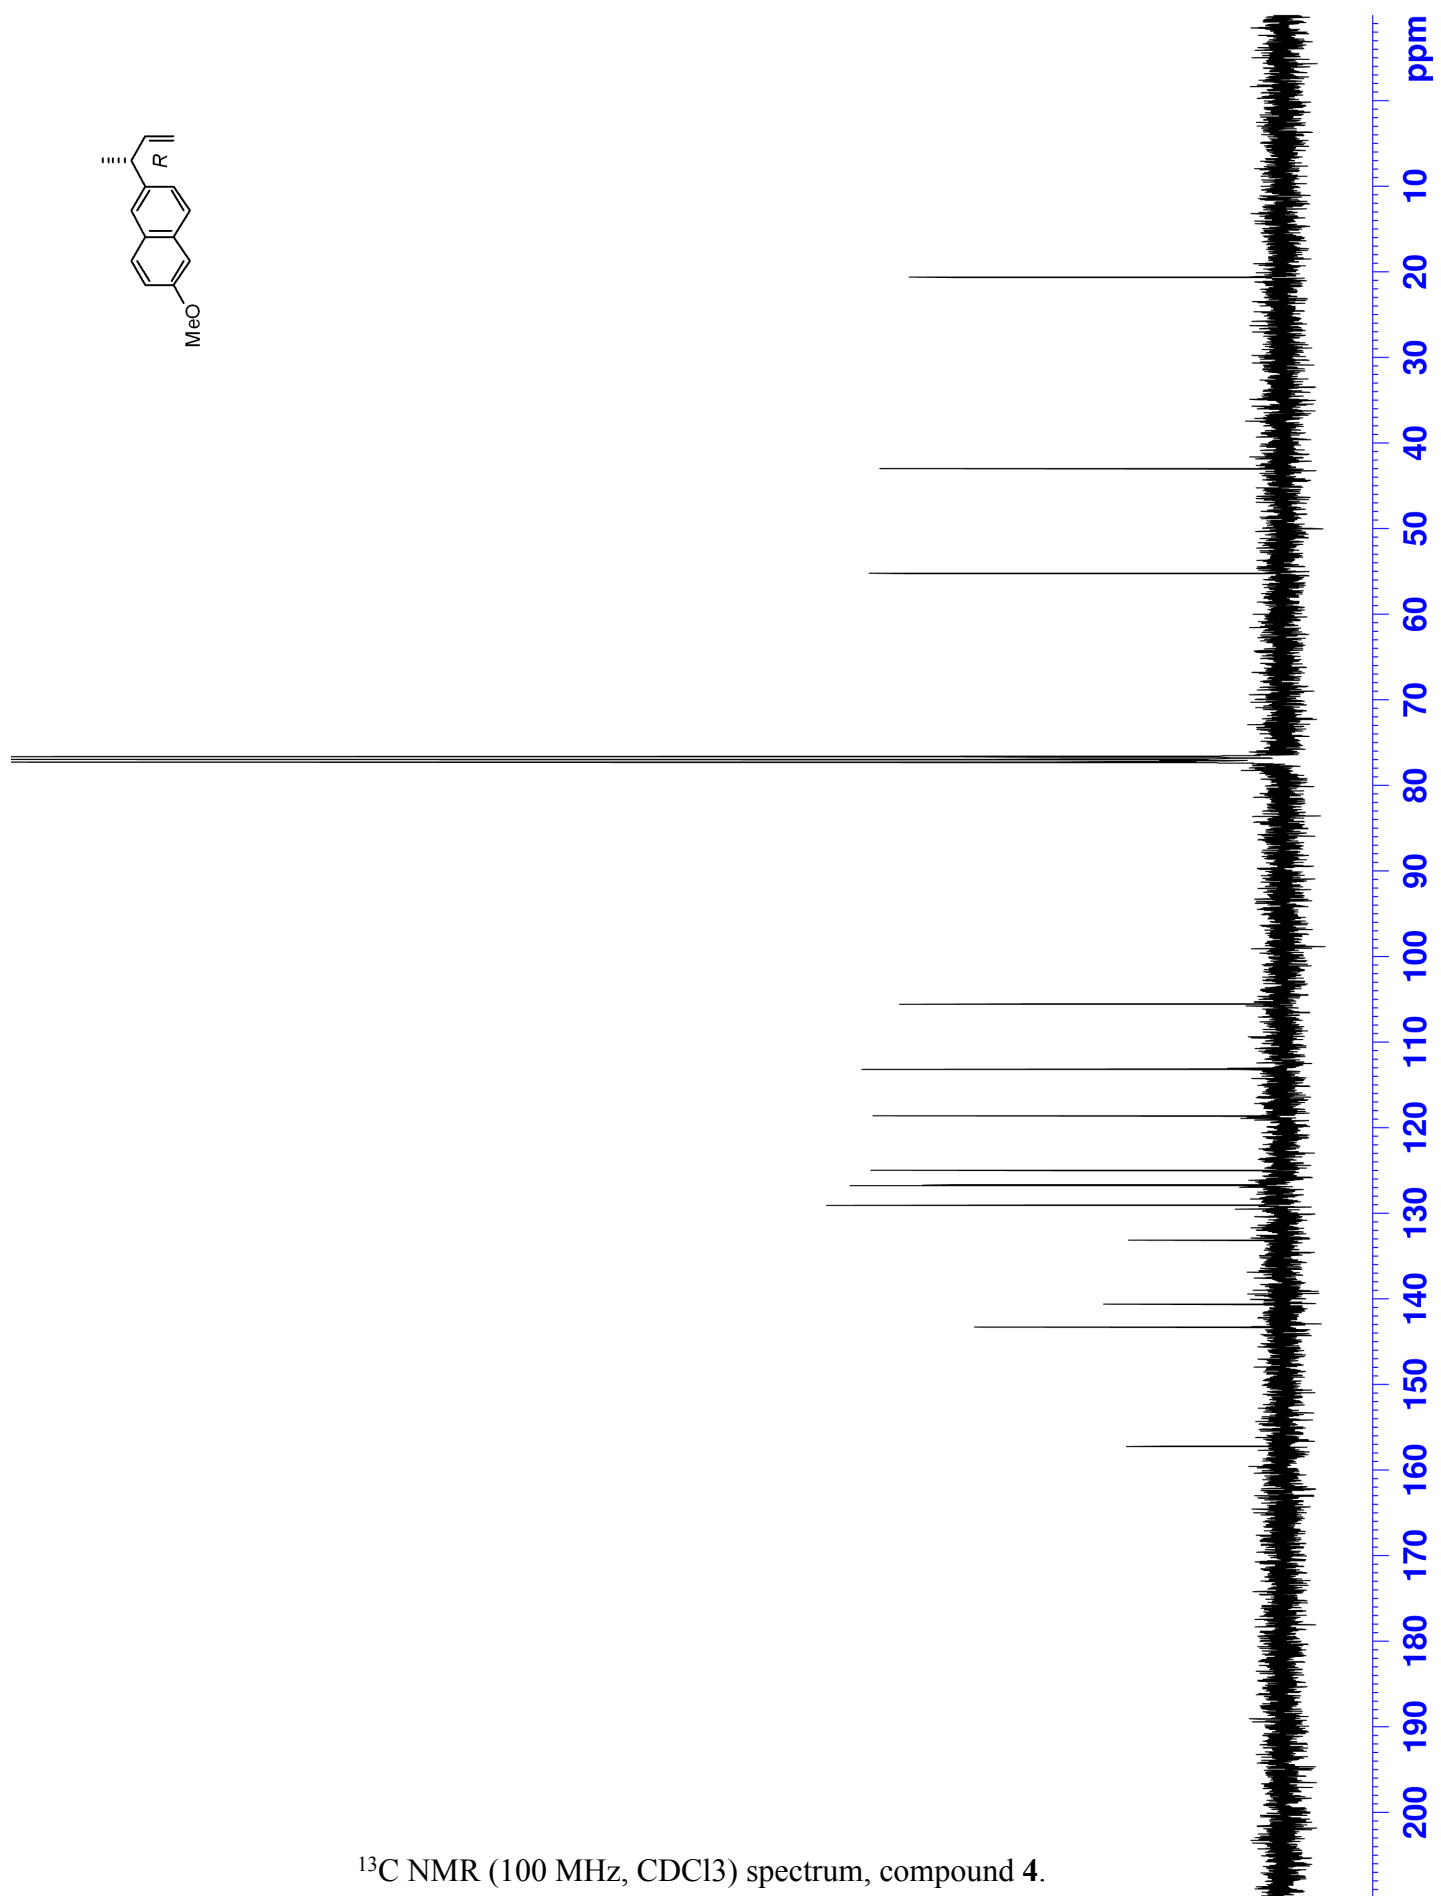

$^{13}\text{C}$  NMR (100 MHz,  $\text{CDCl}_3$ ) spectrum, compound 4.



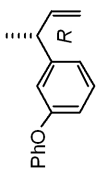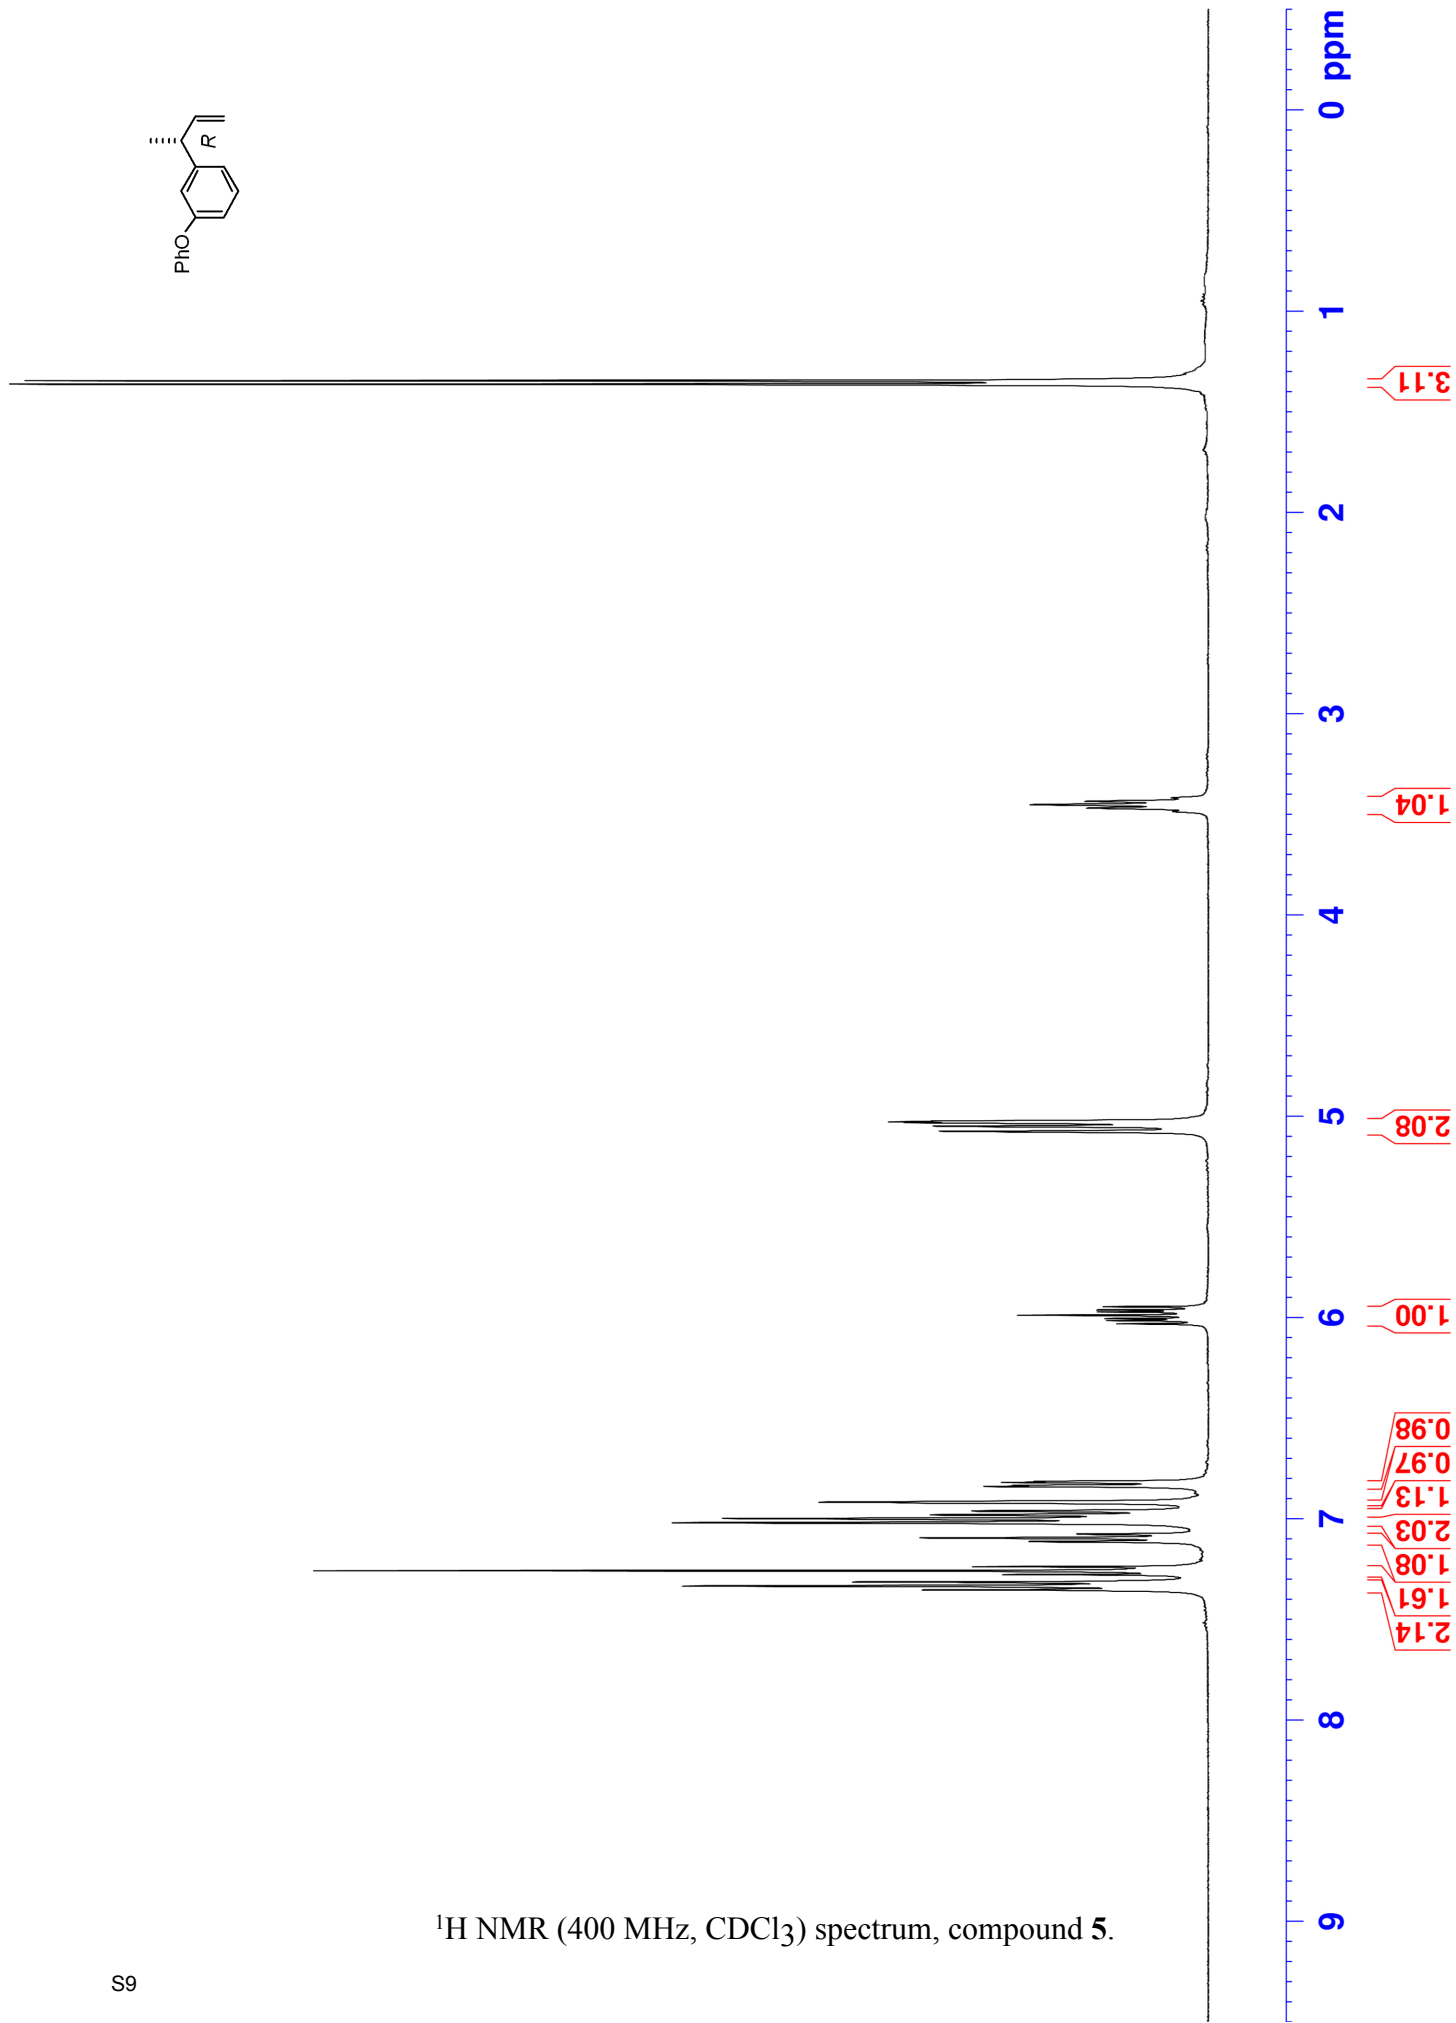

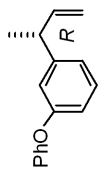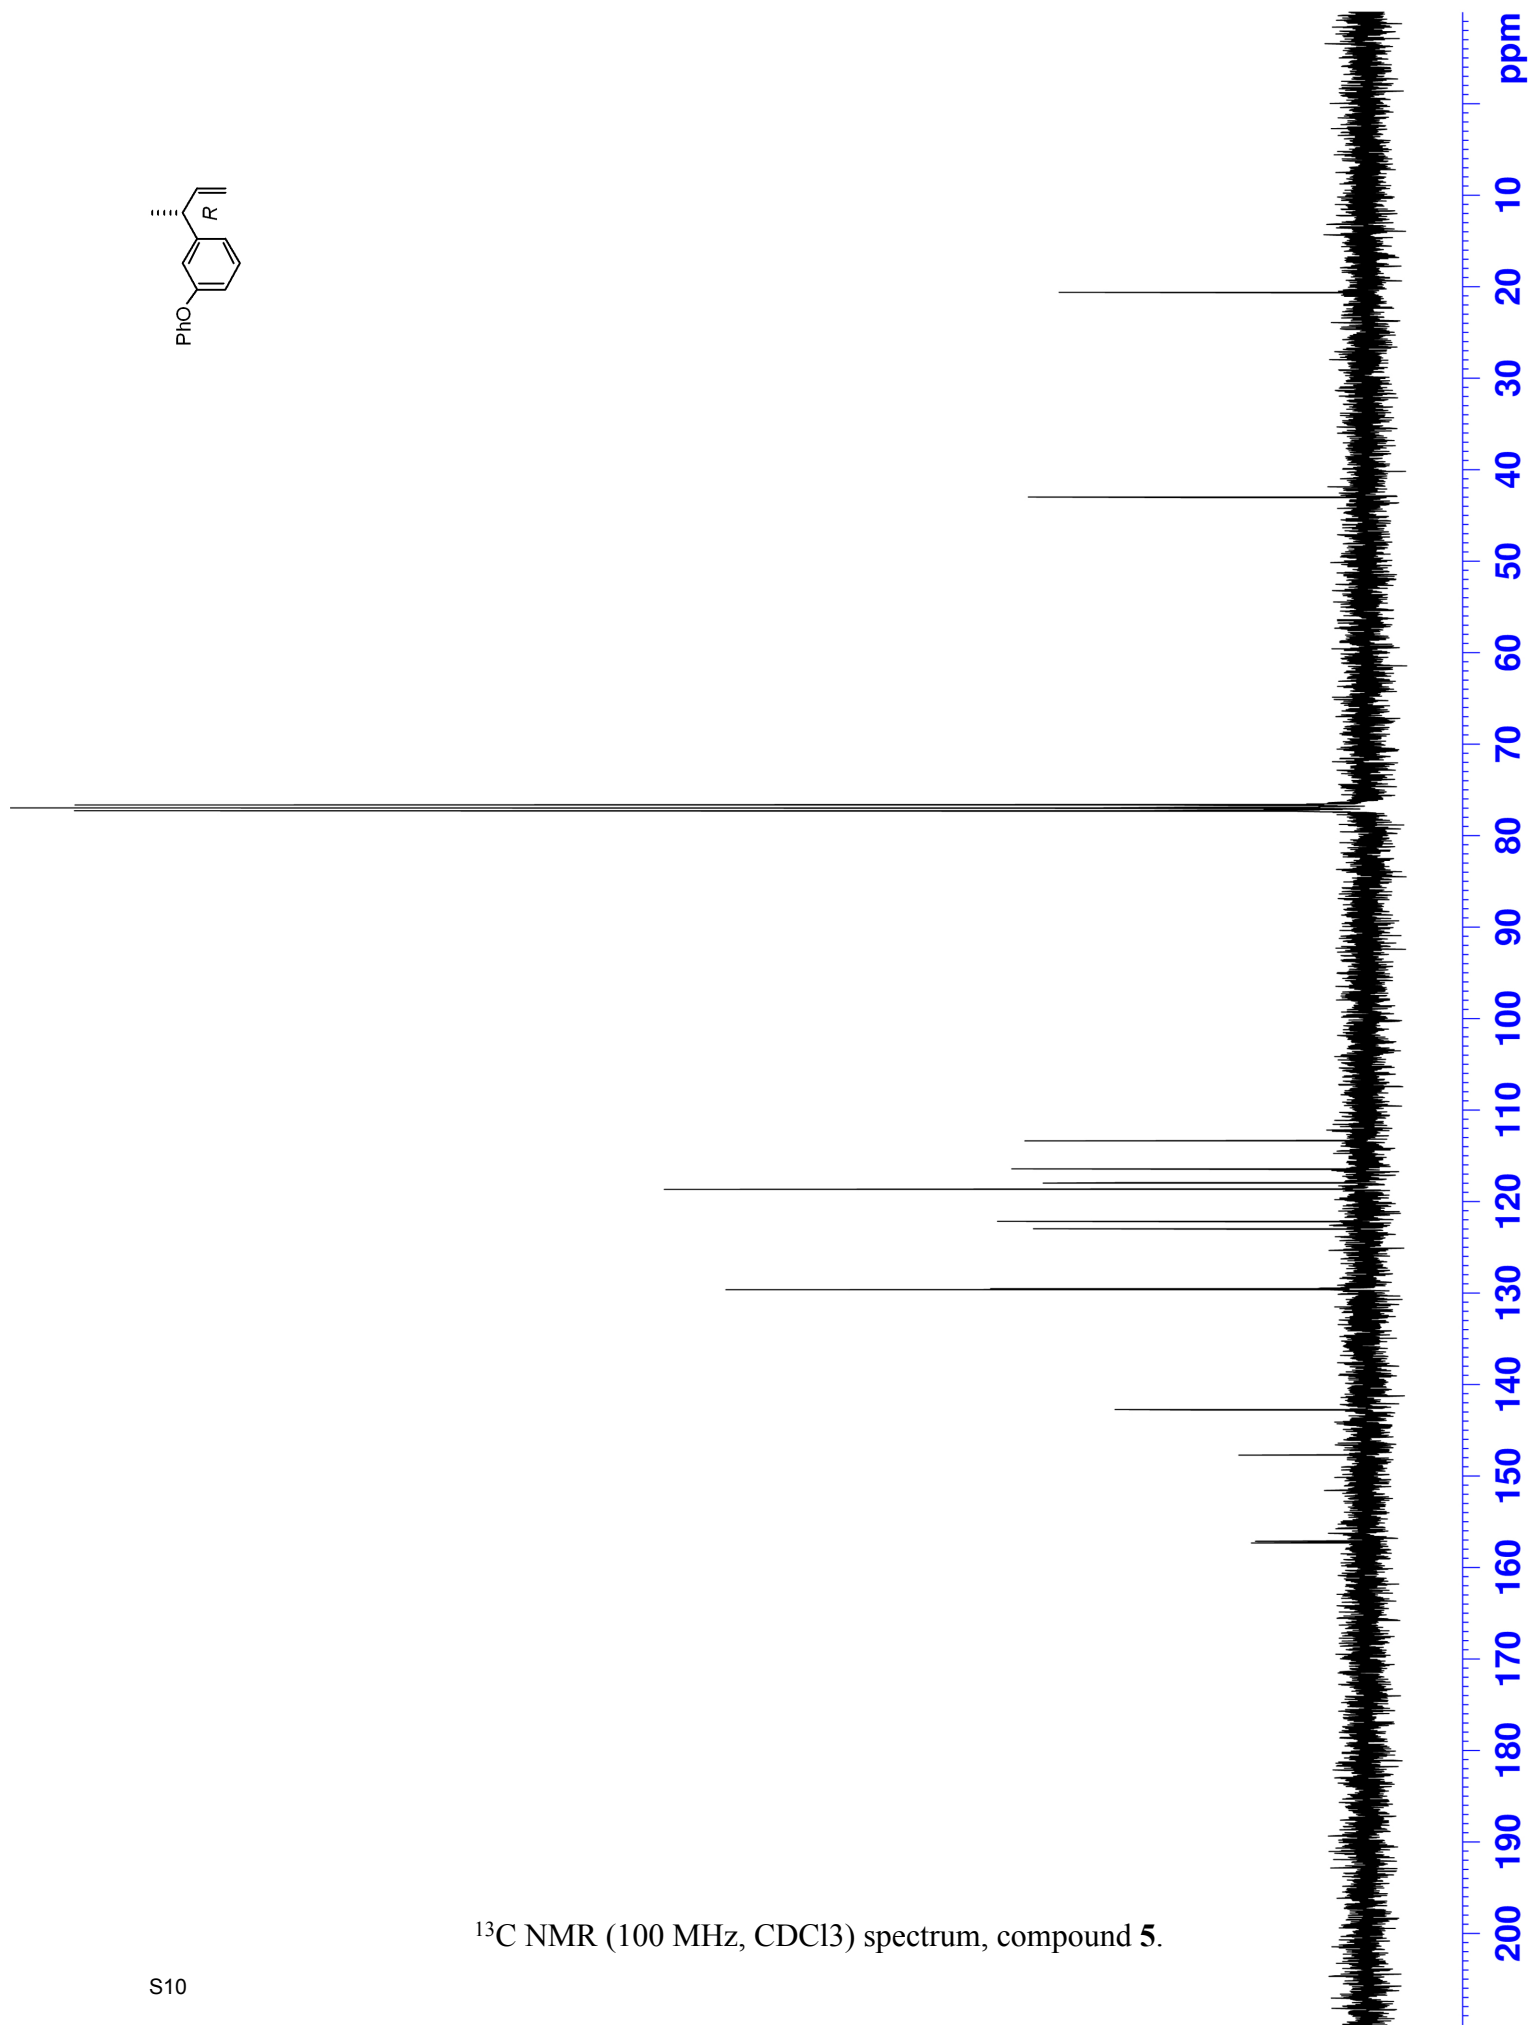

$^{13}\text{C}$  NMR (100 MHz,  $\text{CDCl}_3$ ) spectrum, compound 5.

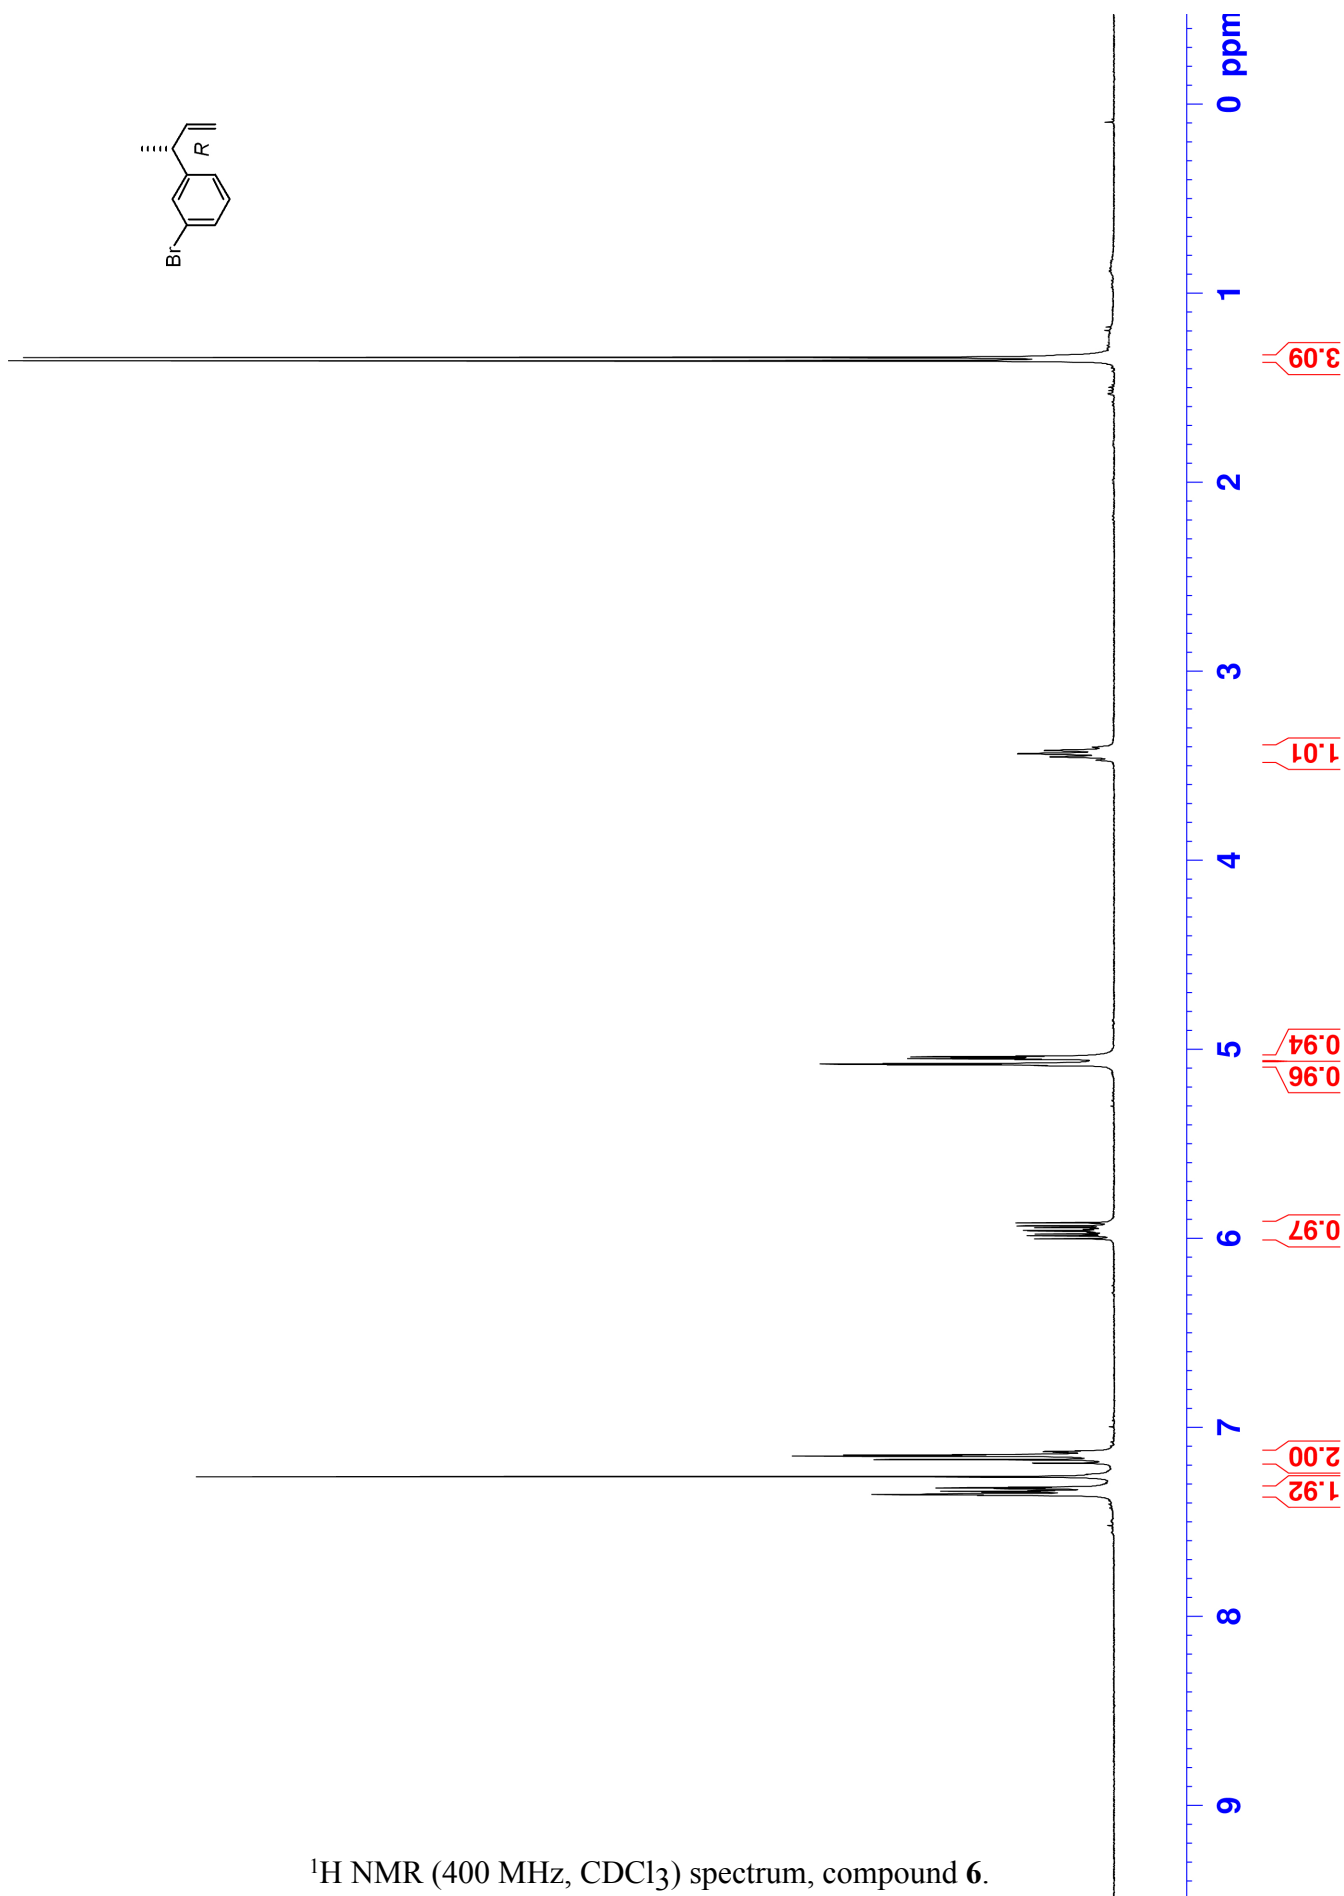

<sup>1</sup>H NMR (400 MHz, CDCl<sub>3</sub>) spectrum, compound 6.

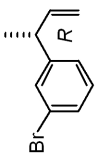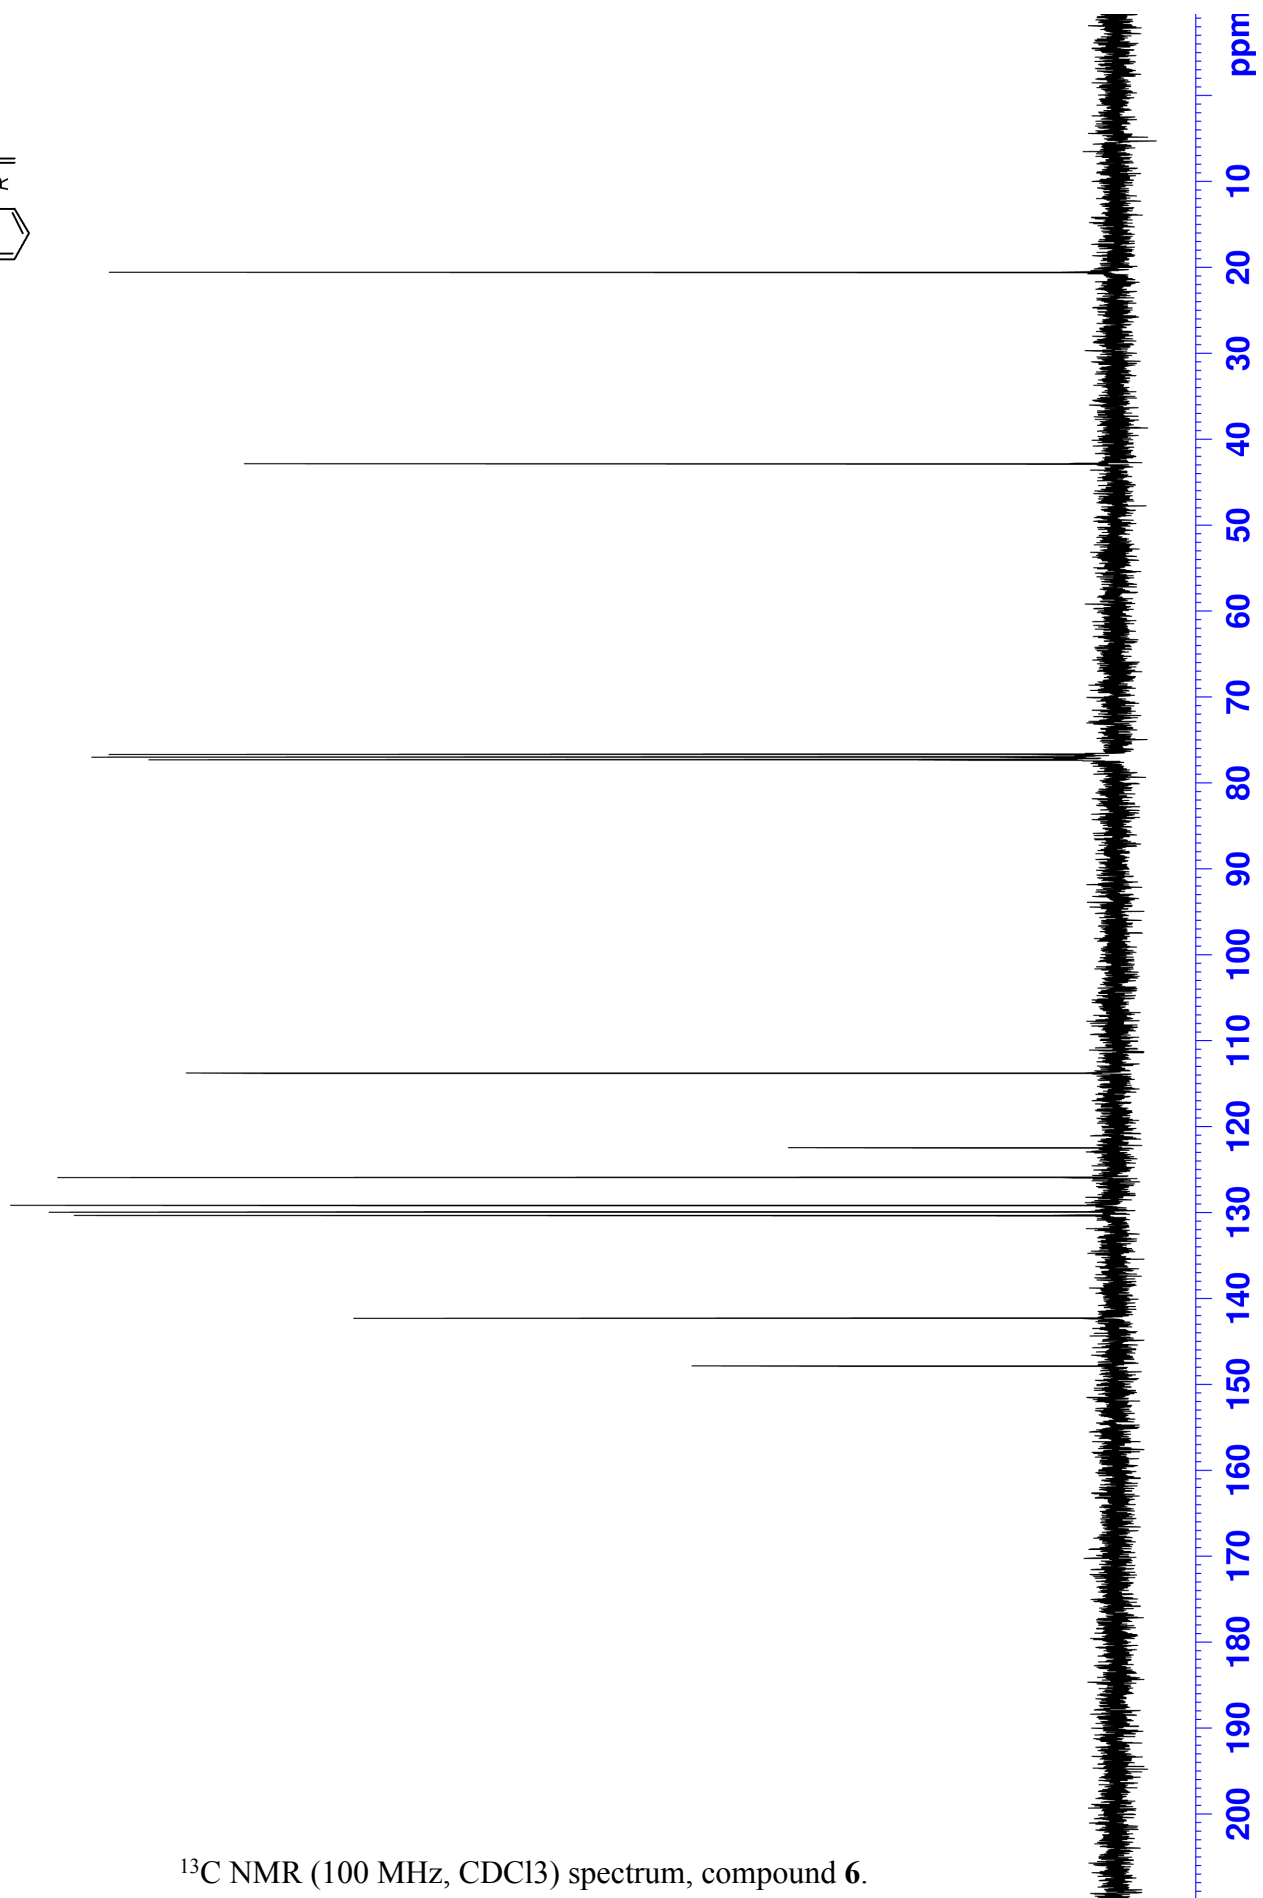

<sup>13</sup>C NMR (100 MHz, CDCl<sub>3</sub>) spectrum, compound 6.

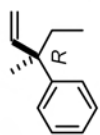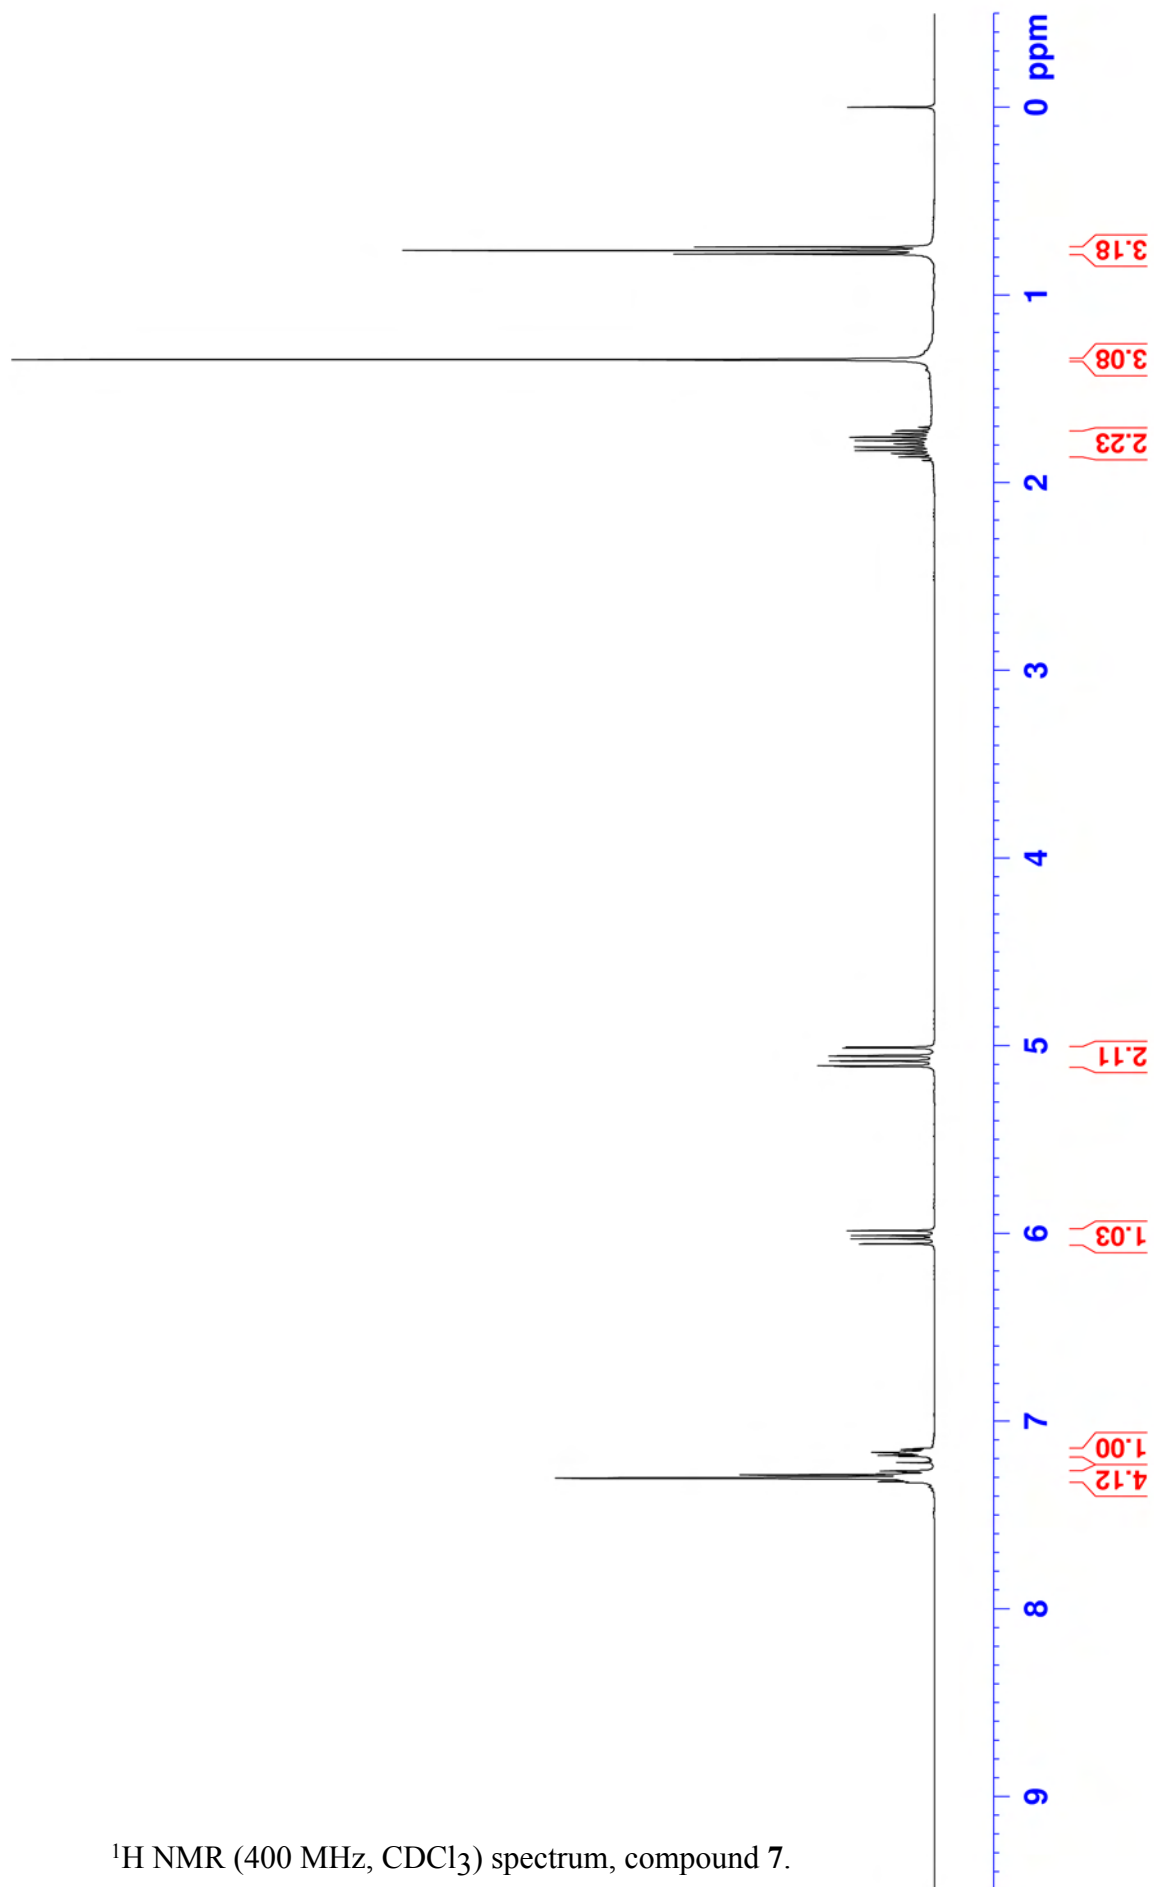

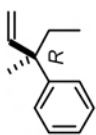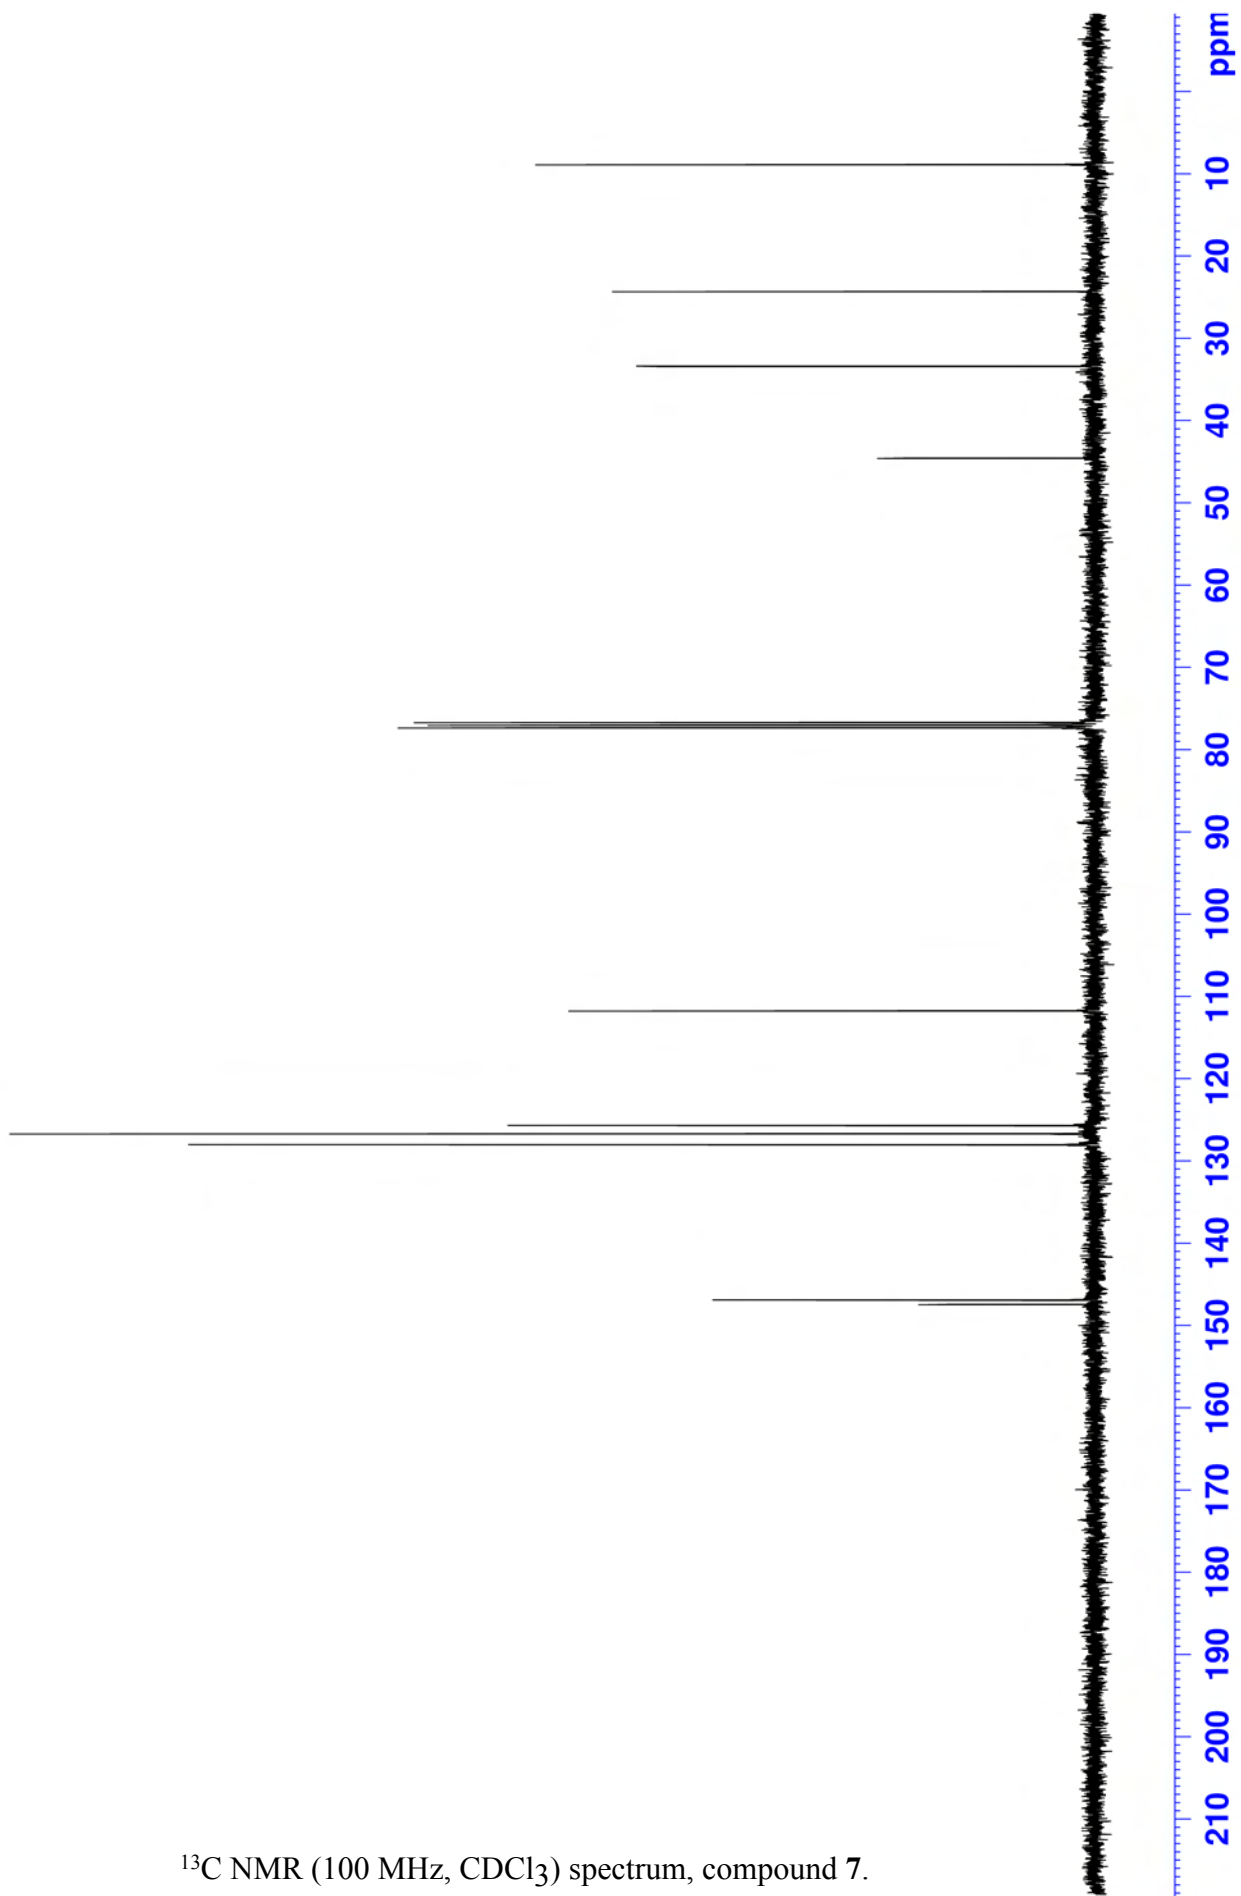

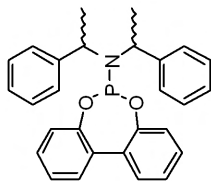

R<sub>1</sub>R<sub>2</sub> & S<sub>1</sub>S<sub>2</sub> (rac)

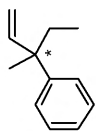

Closing signal file M:SIGMPL.BIN  
 RUN# 3235 JUN 12, 2007 14:01:00  
 SIGNAL FILE: M:SIGMPL.BIN  
 AREA TYPE WIDTH  
 RT  
 00.970 00000 PU 0.346  
 00.440 49000 UU 0.360  
 40.22004  
 TOTAL AREA= 99076  
 MULT FACTOR=1.0000E+00

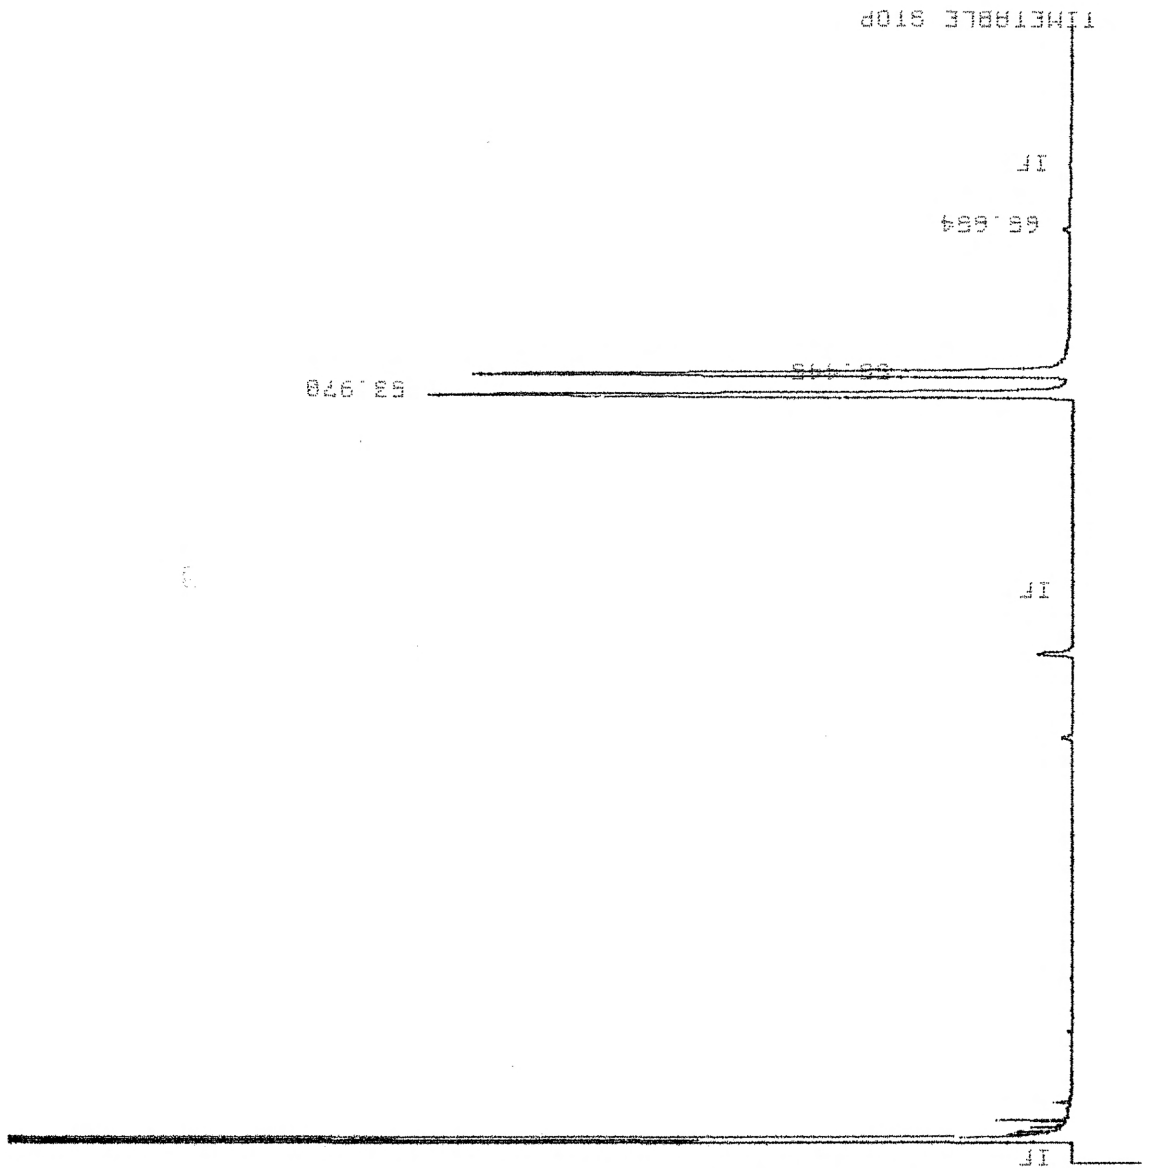

\*RN  
 RUN # 3235 JUN 12, 2007 14:01:00  
 01991

ZERO = 0.172  
 RT 2 = -1  
 CH1 SP = 0.2  
 BR REL = 1000  
 TRASH = -2  
 PK WD = 0.10

Chiral GC (racemic mixture): 40 min at 70°C,  
 5°C/min, 10 min at 90°C, compound 7.

\* BR REL 1000 @  
 \* LIST: LIST  
 PEAK CHIRALITY: 11

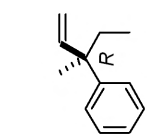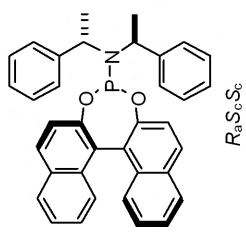

SIGNAL FILE: M:\SIGNBL.DMB  
 RUN# 3260 JUN 11, 2007 14:51:23  
 CLOSING SIGNAL FILE M:\SIGNBL.DMB

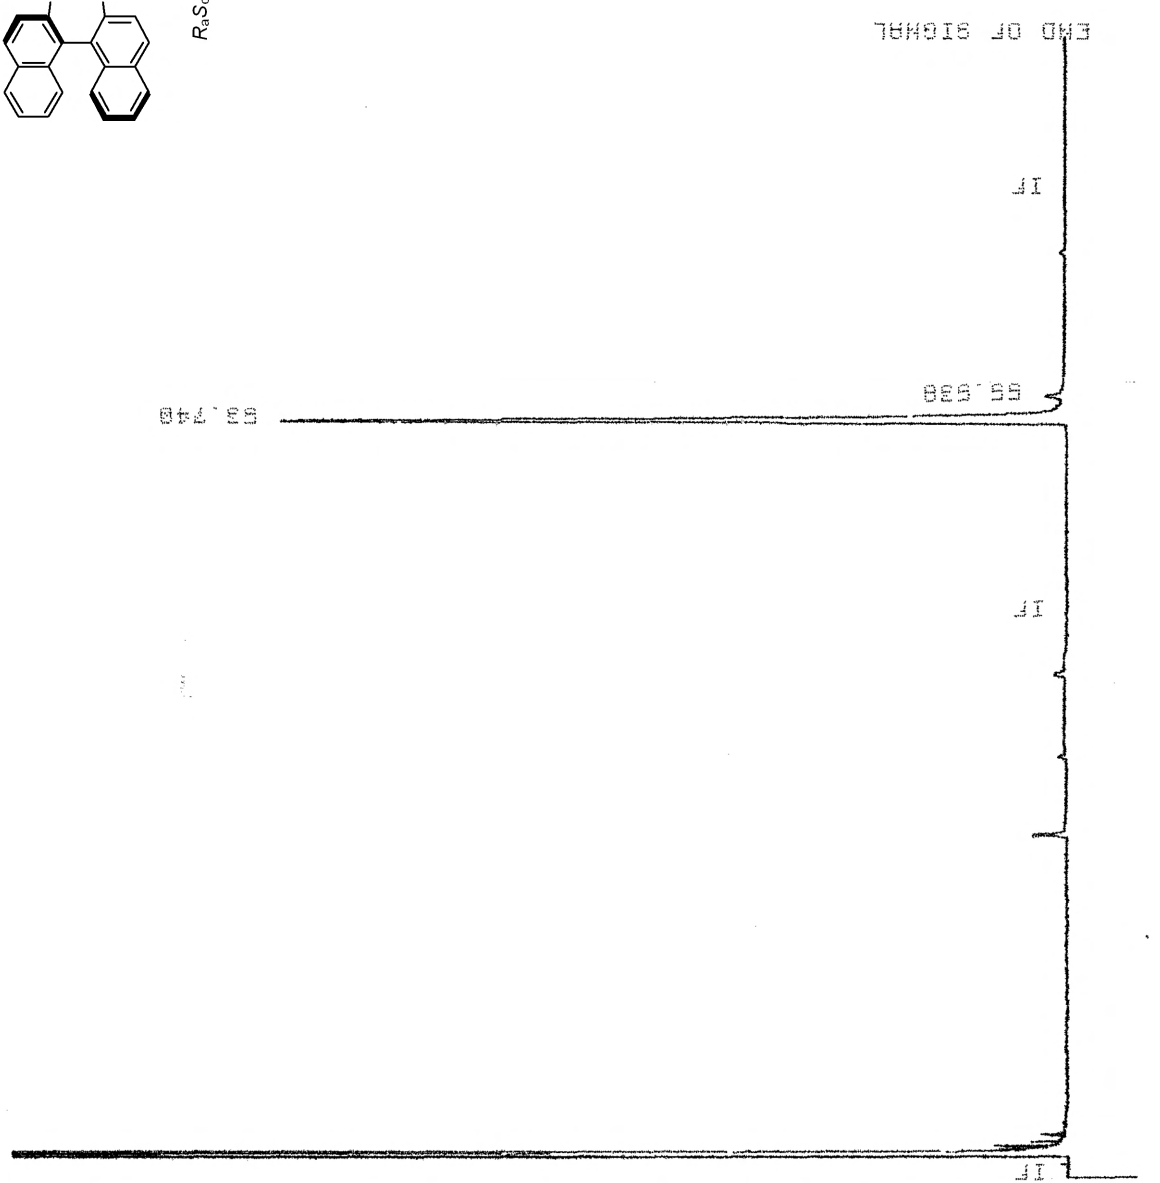

START  
 RUN # 3260 JUN 11, 2007 14:51:23  
 +BN  
 +  
 +  
 +  
 +

ZERO = 0  
 BIT 2 = -1  
 CH1 SP = 0.2  
 PR RCU = 200  
 THRESH = -2  
 PK WD = 0.10

Chiral GC: 40 min at 70°C, 5°C/min, 10 min at 90°C,  
 compound 7.

\* LIST: LIST  
 PEAK CAPACITY: 1164



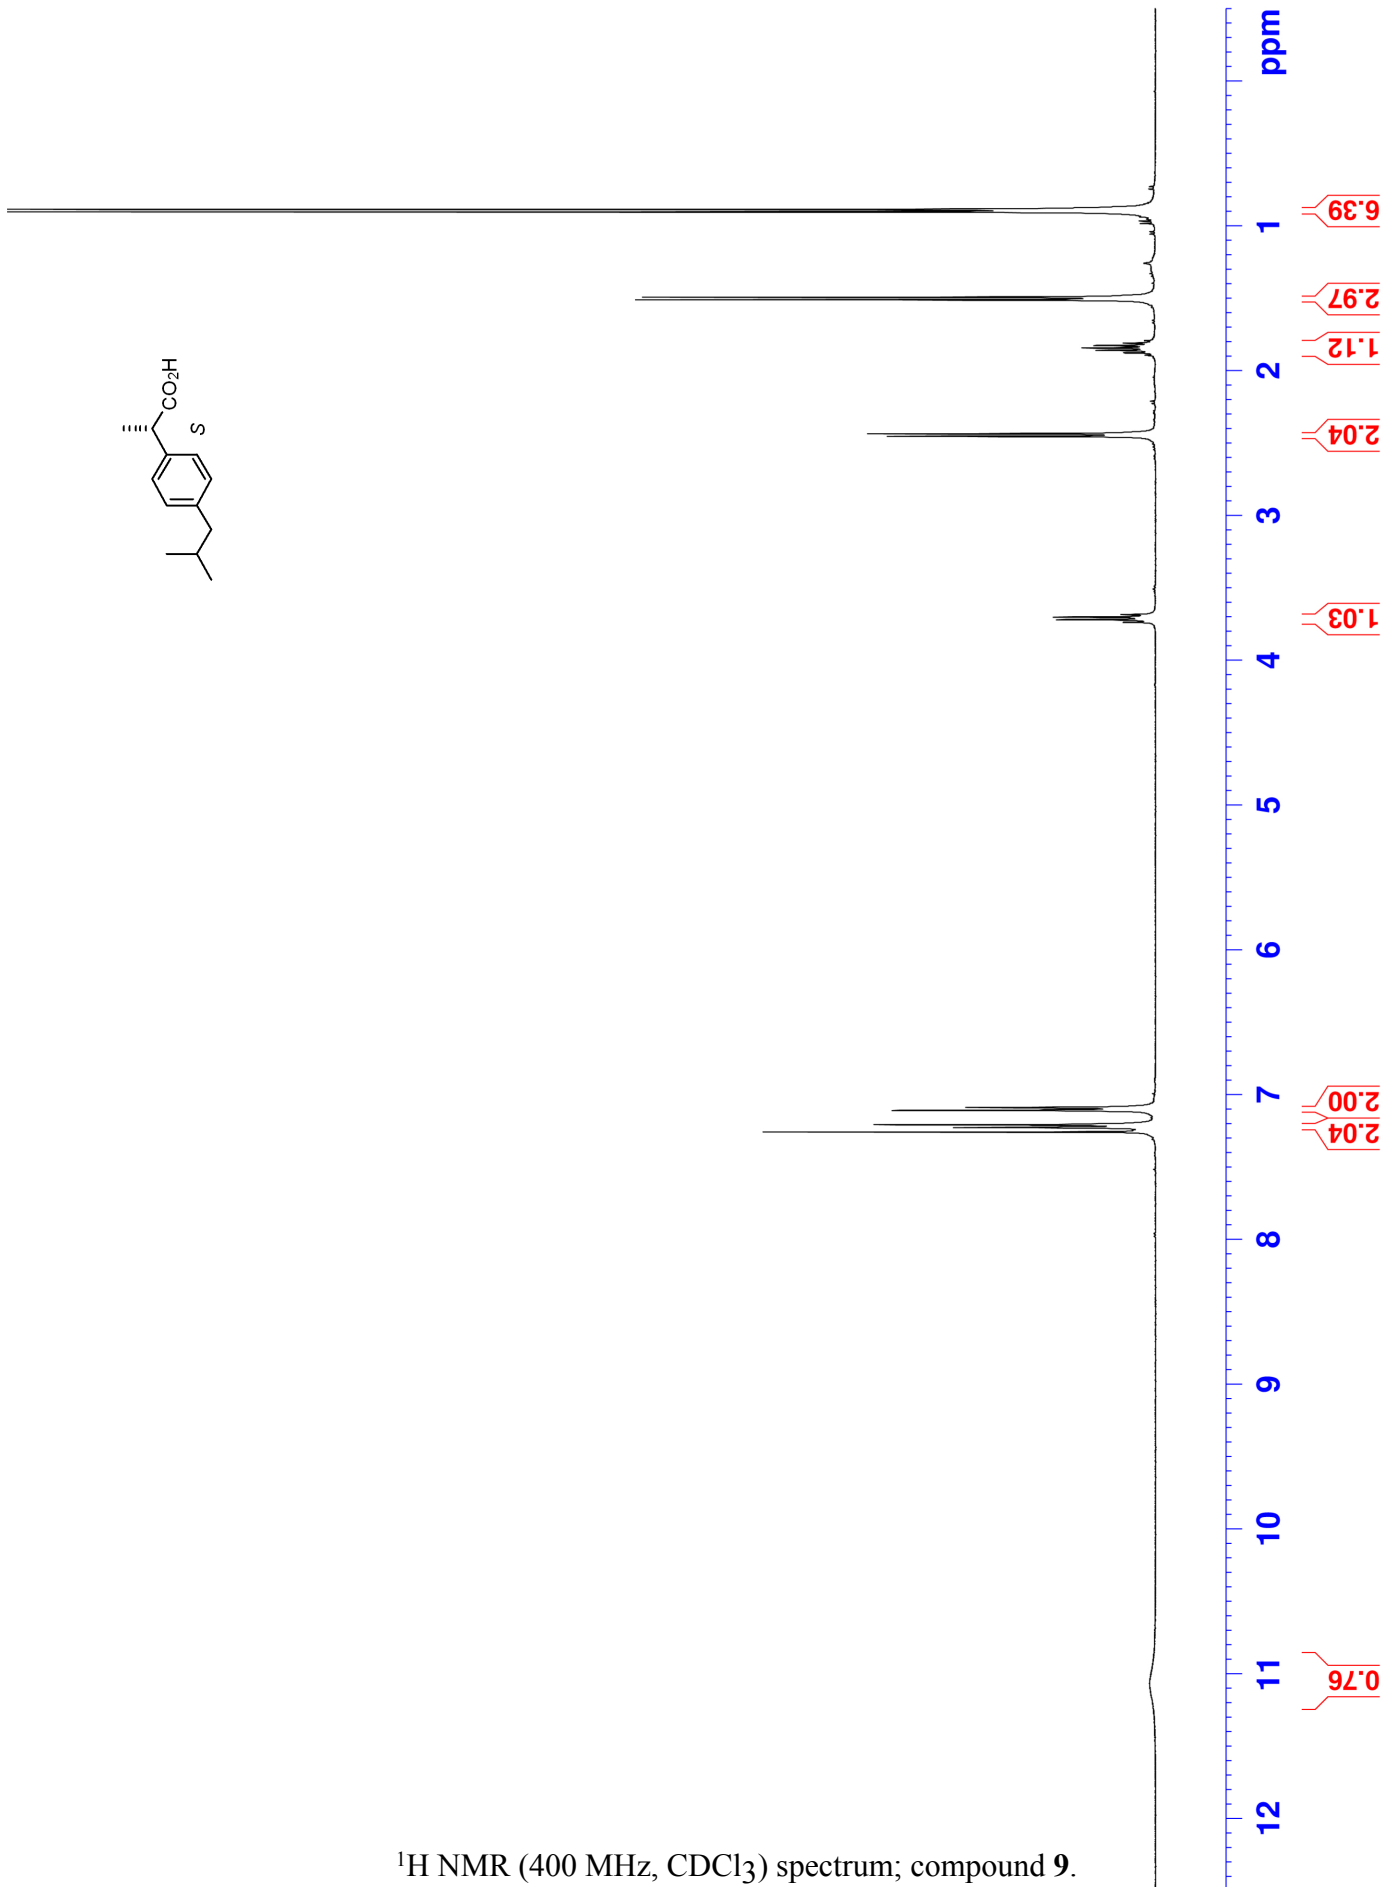

<sup>1</sup>H NMR (400 MHz, CDCl<sub>3</sub>) spectrum; compound 9.

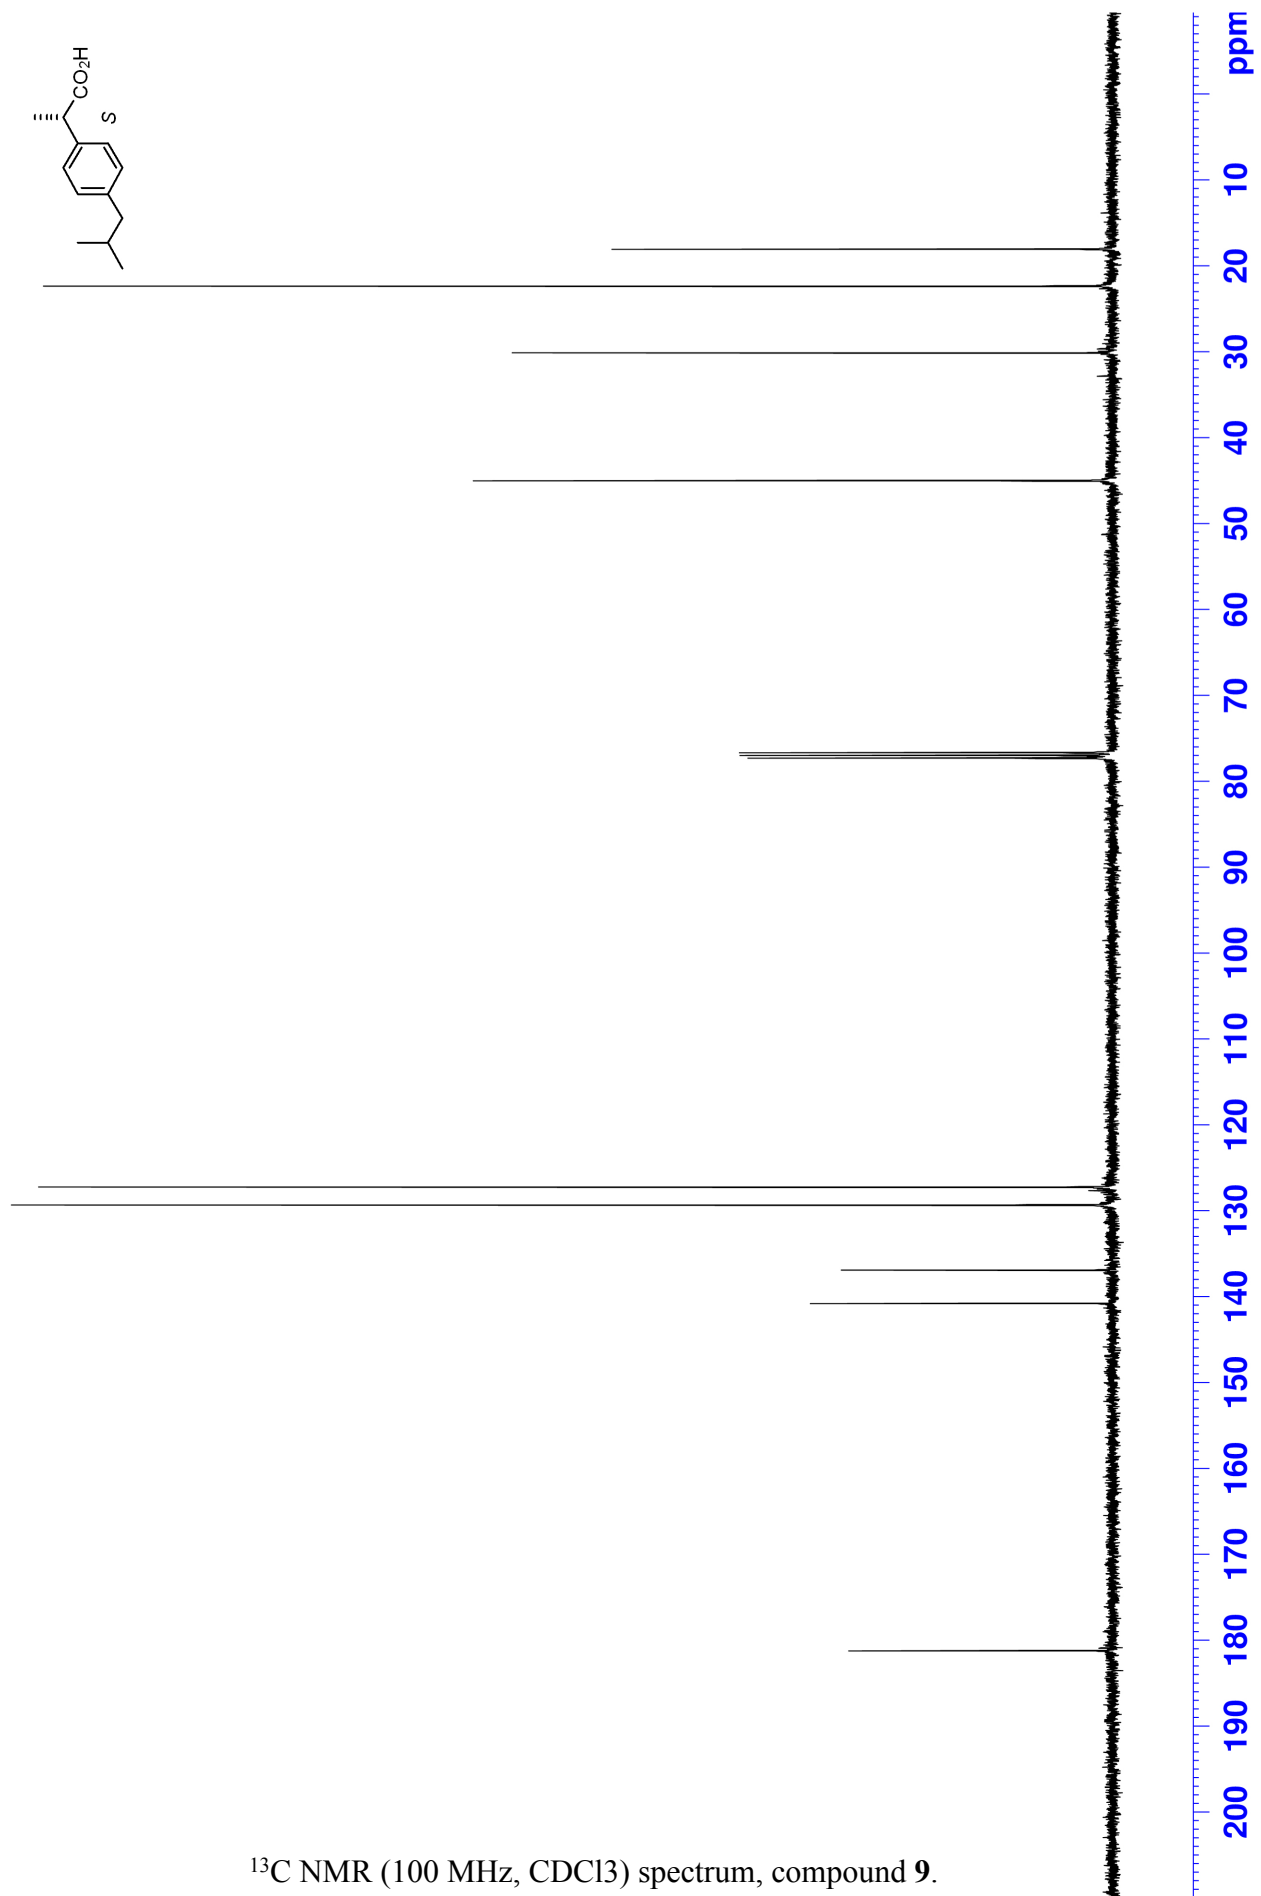

TOTAL AREA= 110399  
MUL FACTOR=1.0000E+00

| RT     | AREA TYPE | WIDTH | AREA%    |
|--------|-----------|-------|----------|
| 39.554 | PB        | .302  | 60.53949 |
| 42.551 | BU        | .347  | 39.46051 |

SIGNAL FILE: M:SIGNAL.BNC  
AREA%

Closing signal file M:SIGNAL.BNC  
RUN# 3549 FEB 22, 2008 08:40:42

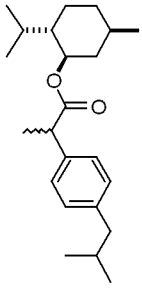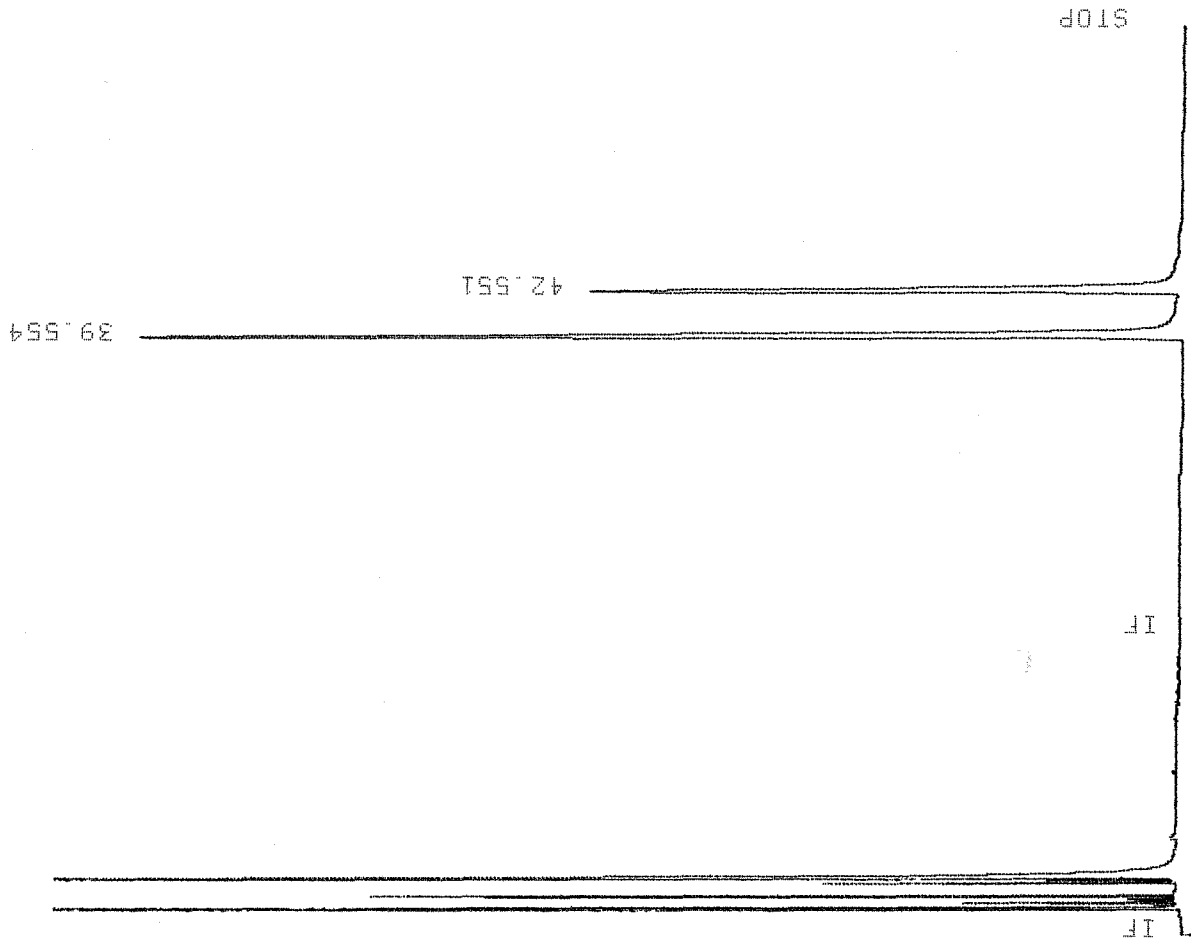

\* LIST: LIST  
PEAK CAPACITY: 1164  
ZERO = 0, -0.046  
RT 2 = -1  
CHT SP = 0.2  
AR RES = 500  
THRESH = -3  
PK WD = 0.10  
\*  
\* RUN # 3549 FEB 22, 2008 08:40:42  
START: not ready  
IF

Chiral GC (Cyclodex-β): 60 min at 160°C;  
L-menthyl ester of compound 9 (enriched).

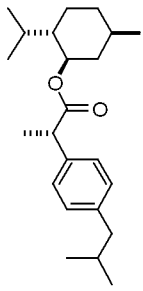

SIGNAL FILE: M:SIGNAL.BNC  
 RUN# 3550 FEB 22, 2008 09:43:47  
 Closing signal file M:SIGNAL.BNC  
 AREA%  
 RT AREA TYPE WIDTH AREA%  
 24.378 1919 PU .205 1.33908  
 36.462 737 PU .267 .51428  
 39.424 139401 PB .300 97.27437  
 42.585 1250 UU .331 .87225  
 TOTAL AREA= 143307  
 MUL FACTOR=1.000E+00

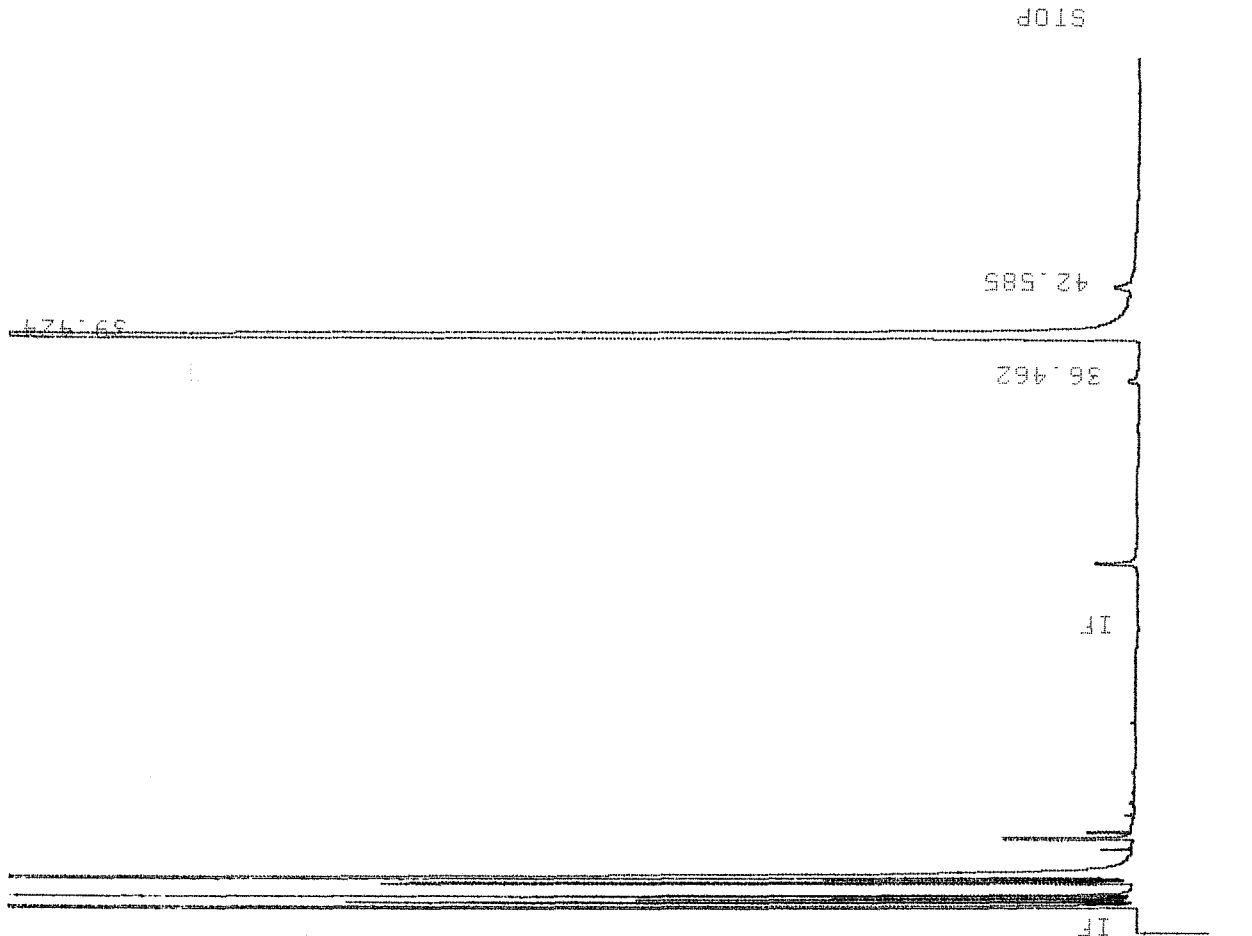

\* RUN # 3550 FEB 22, 2008 09:43:47  
 START; not ready  
 IF  
 ZERO = 0, -0.050  
 RTI Z = -1  
 CHI SP = 0.2  
 AR REJ = 500  
 THRESH = -3  
 PK MD = 0.10  
 \* LIST: LIST  
 PEAK CAPACITY: 1164

Chiral GC (Cyclodex- $\beta$ ): 60 min at 160°C;  
 L-menthyl ester of compound **9** (from **2**).

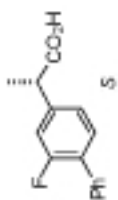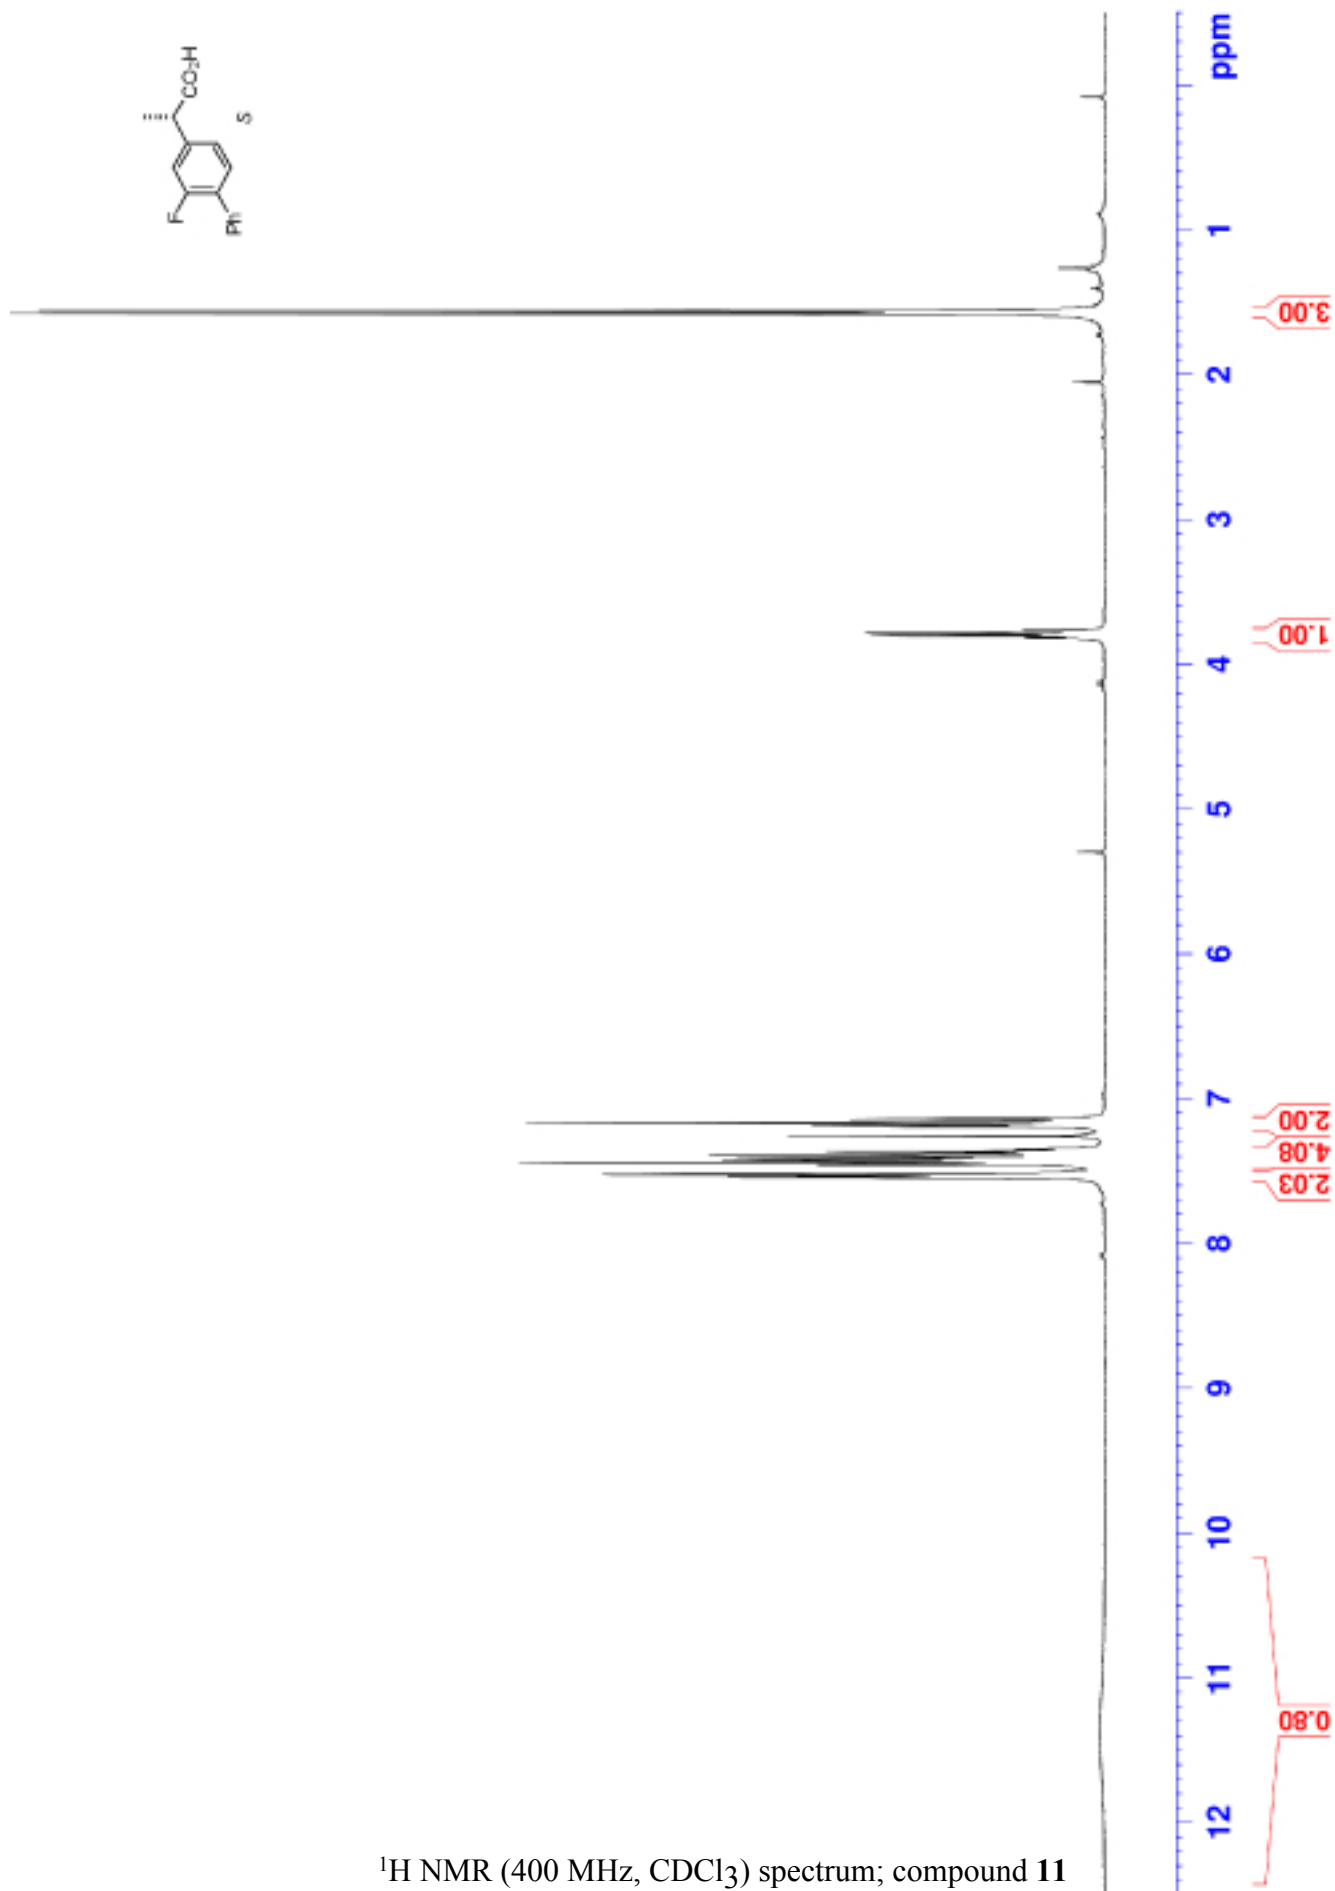

<sup>1</sup>H NMR (400 MHz, CDCl<sub>3</sub>) spectrum; compound 11

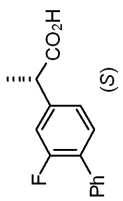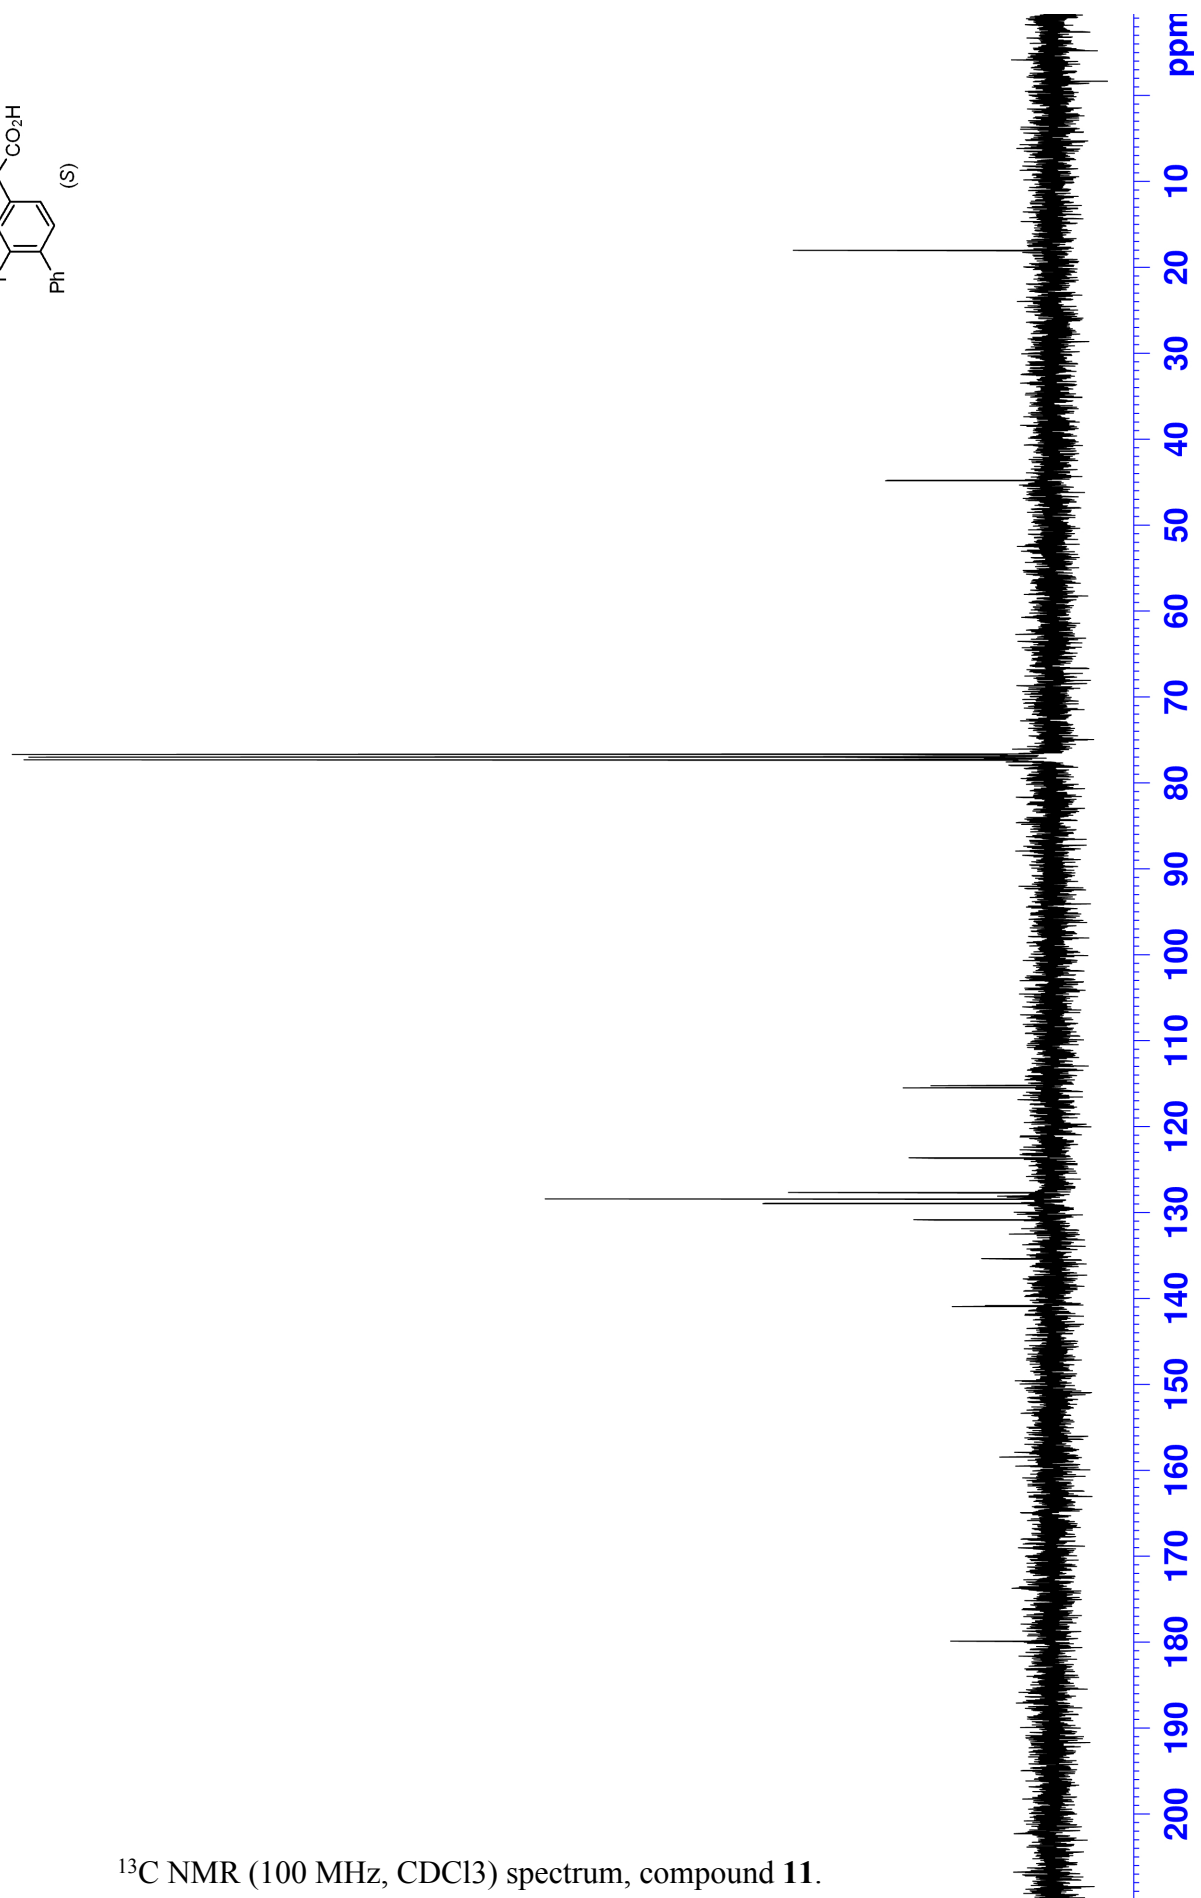

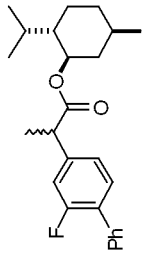

| RT     | AREA TYPE | WIDTH | AREA%    |
|--------|-----------|-------|----------|
| 87.215 | BV        | .226  | 21.68634 |
| 82.244 | VV        | .479  | 78.31366 |

RUN# 210  
 APR 12, 1991 22:00:55  
 Error stopping signal to M: SIGNAL .BNC  
 ATTEMPTED WRITE PAST END OF FILE

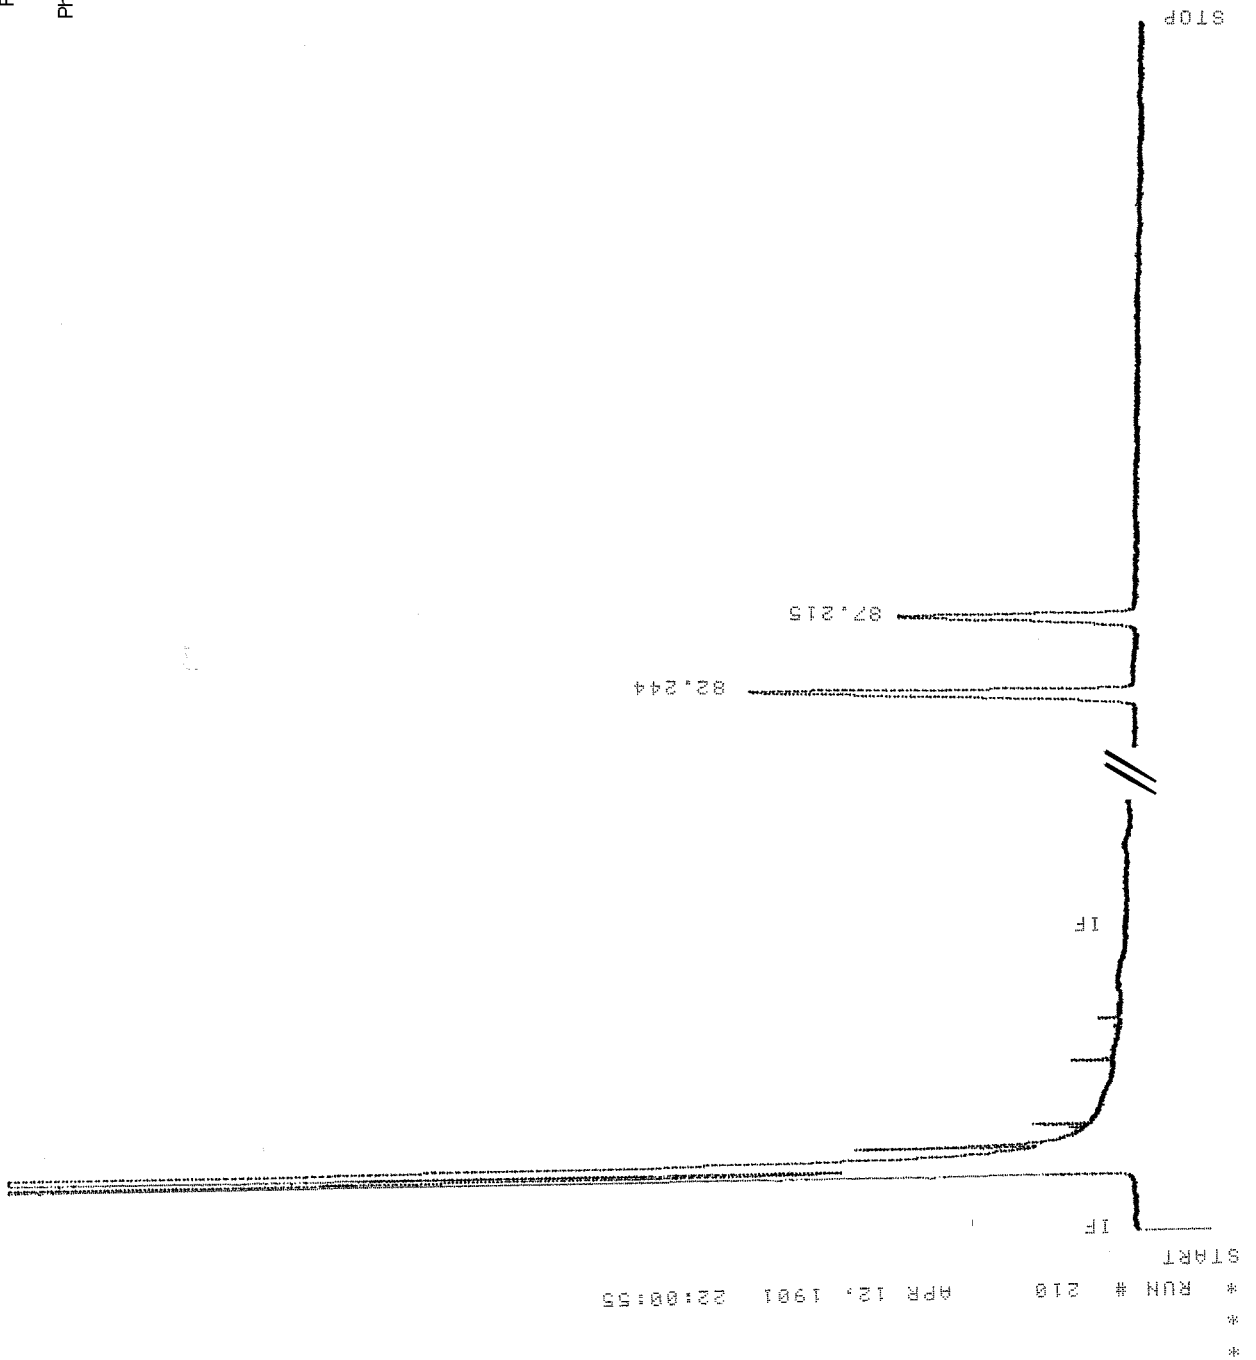

ZERO = 0.849  
 ATT 2 = 2  
 CH1 SP = 0.2  
 AR REU = 3000  
 THRESH = 2  
 PK WD = 0.04

Chiral GC (Chirasil-S-Val): 120 min at 200°C;  
 L-menthyl ester of compound 11 (enriched).

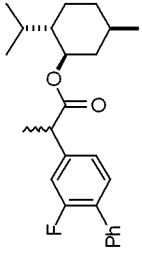

TOTAL AREA= 248399  
 MUL FACTOR=1.0000E+00

| RT     | AREA   | TYPE | WIDTH | AREA%    |
|--------|--------|------|-------|----------|
| 87.365 | 742554 | BP   | .522  | 99.21901 |
| 81.902 | 5845   | UV   | .115  | .28100   |

AREA%  
 RUN# 211  
 APR 13, 1901 00:25:25

Error storing signal to M: SIGNAL .BNC  
 ATTEMPTED WRITE PAST END OF FILE

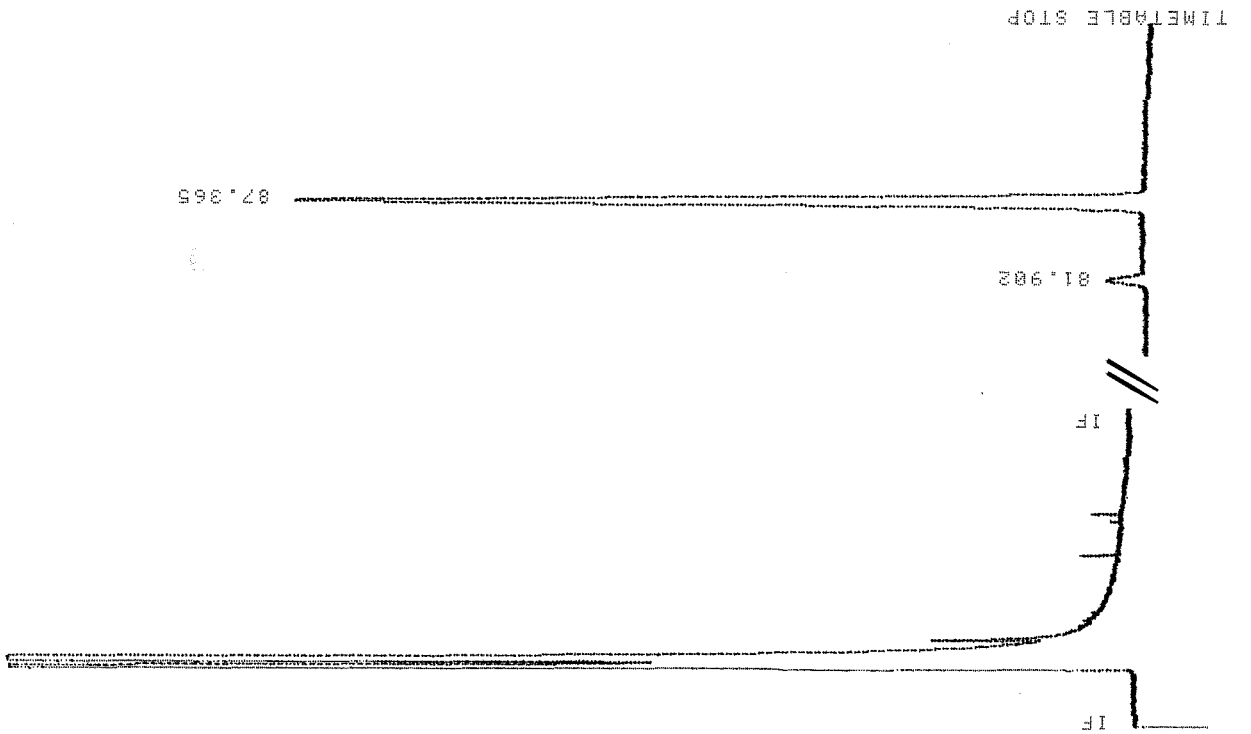

\*  
 \*  
 \* RUN # 211 APR 13, 1901 00:25:25  
 \*  
 \*  
 START

\* LIST: LIST  
 PEAK CAPACITY: 1243  
 ZERO = 0.8777  
 ATT 2V = 2  
 CH1 SP = 0.2  
 AR REF = 5000  
 THRESH = 2  
 PK MD = 0.04

Chiral GC (Chirasil-S-Val): 120 min at 200°C;  
 L-menthyl ester of compound 11 from 3.



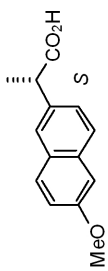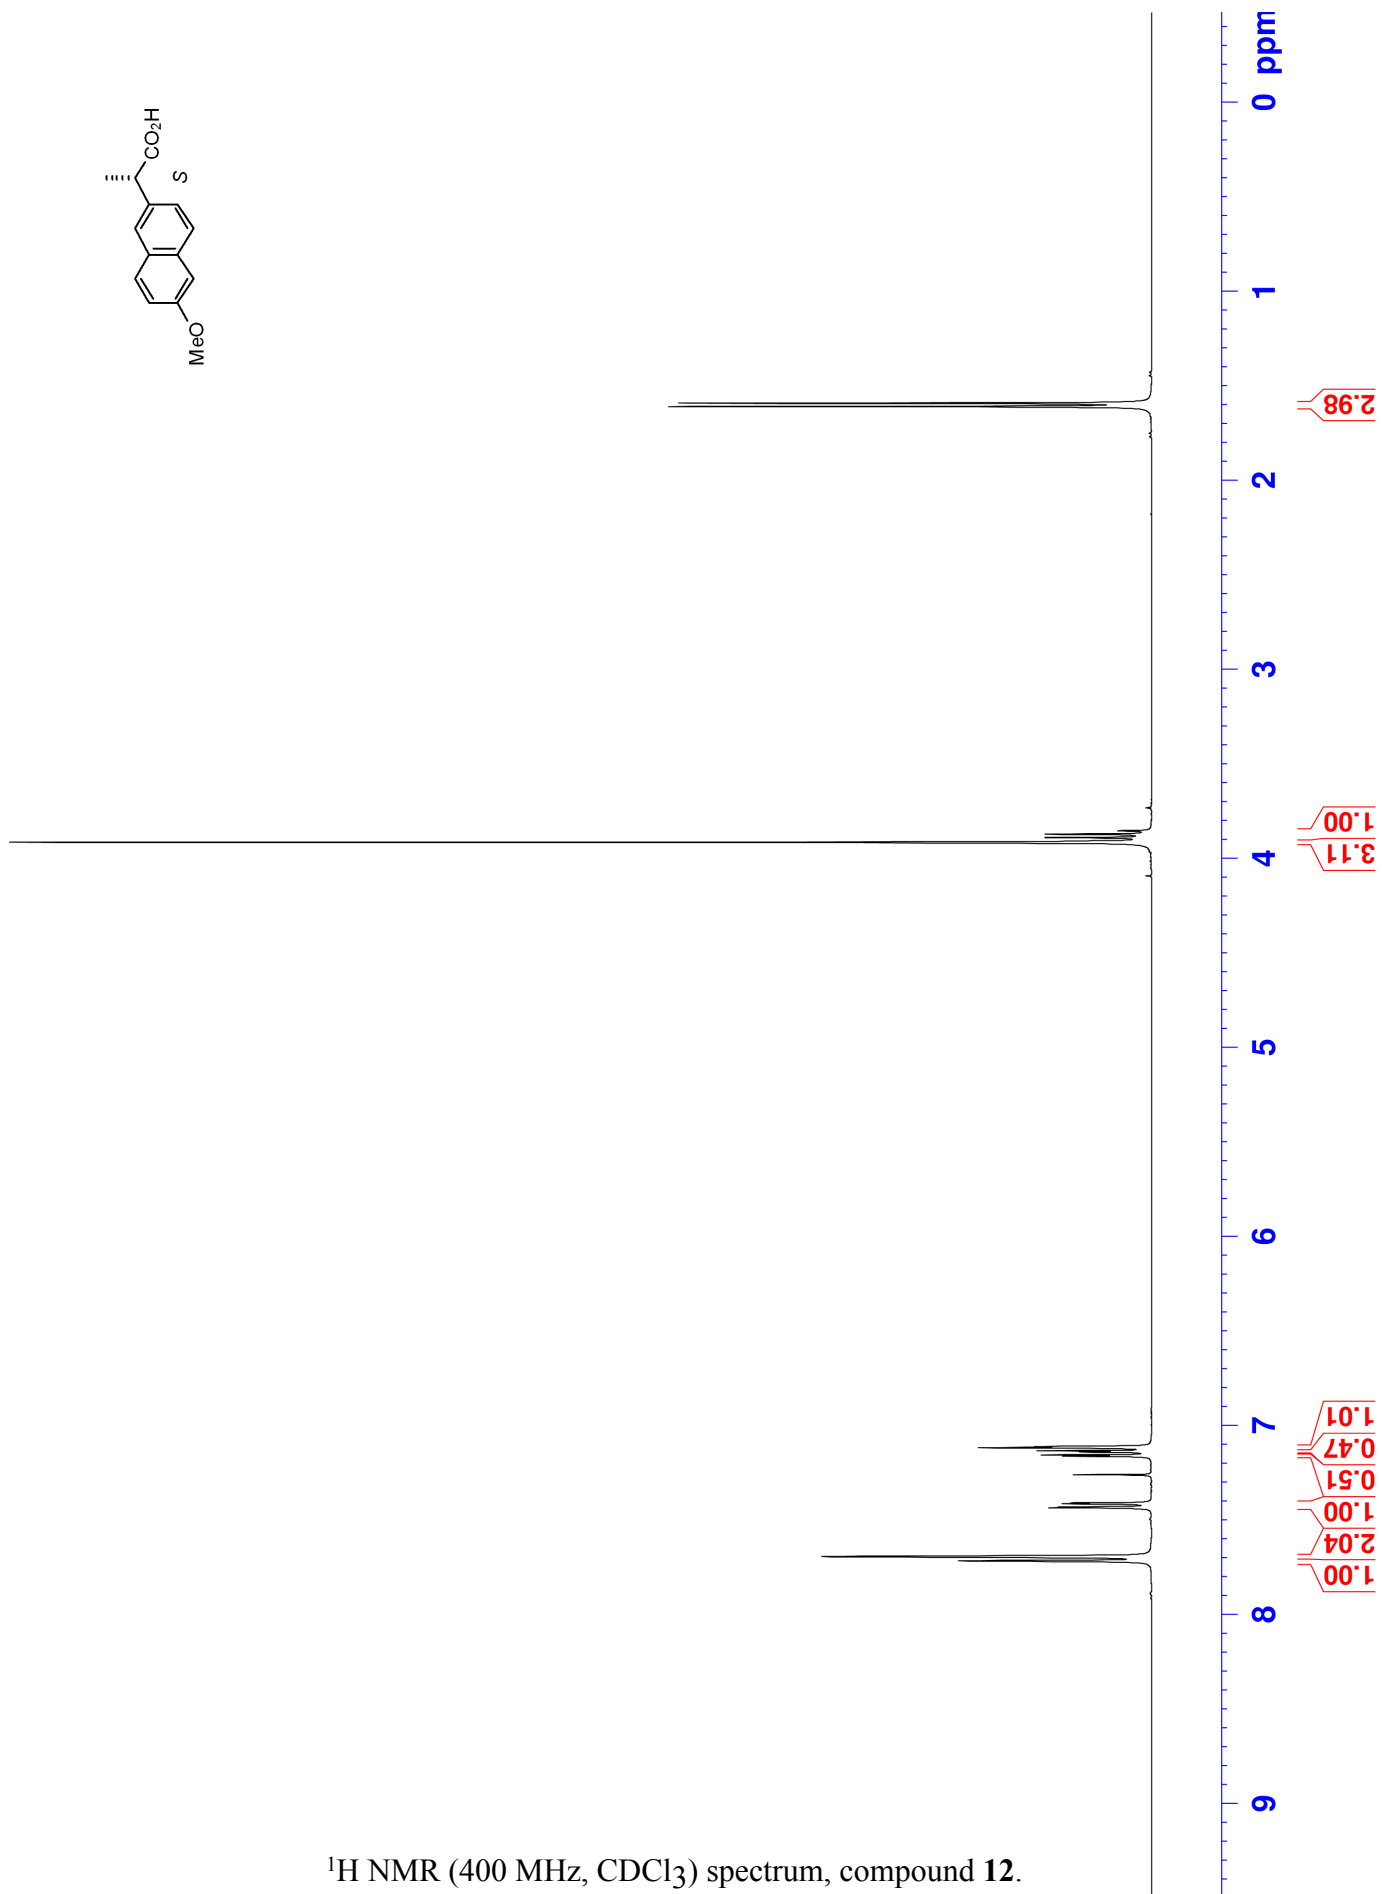

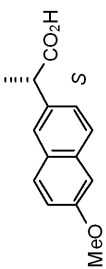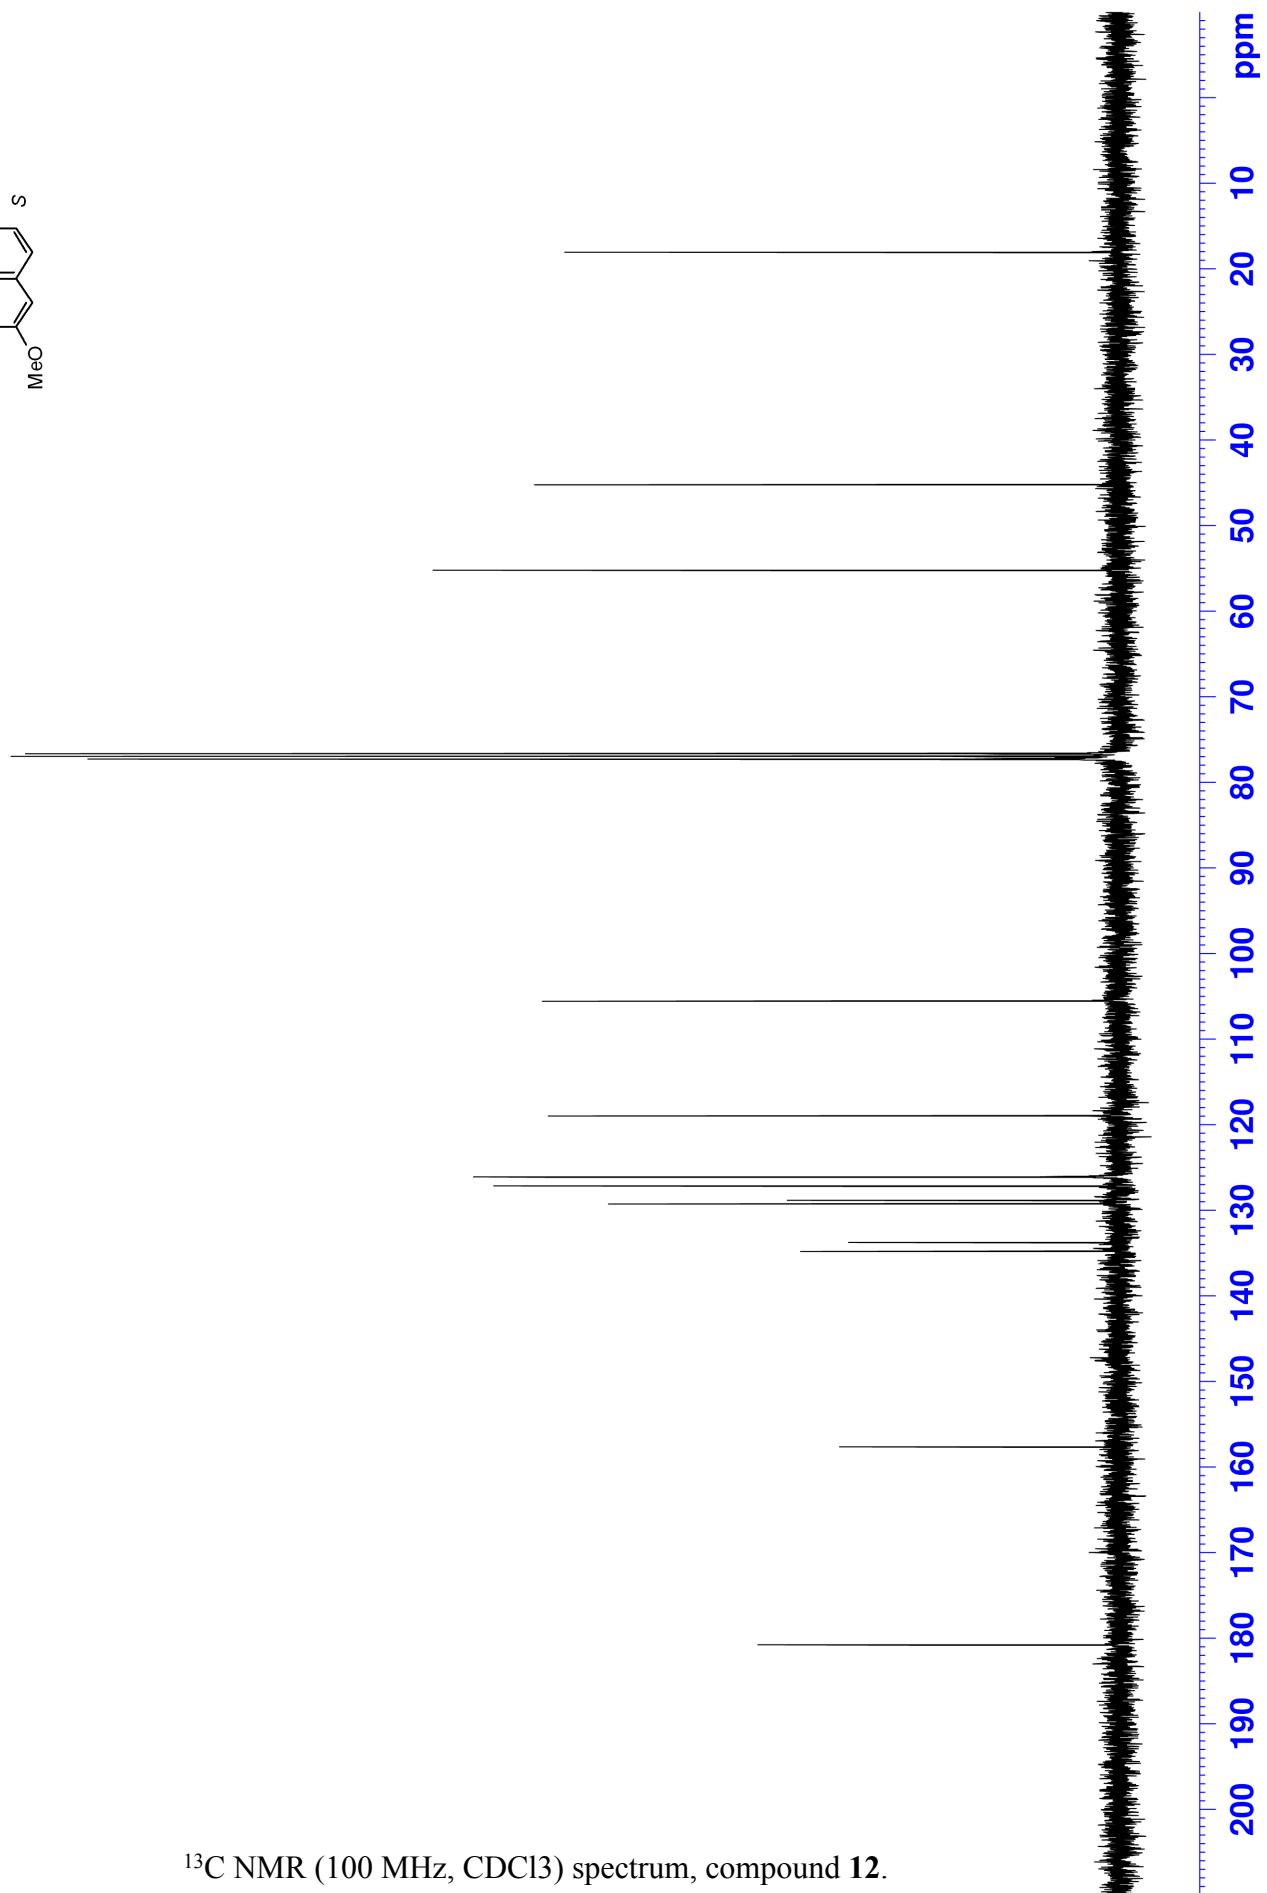

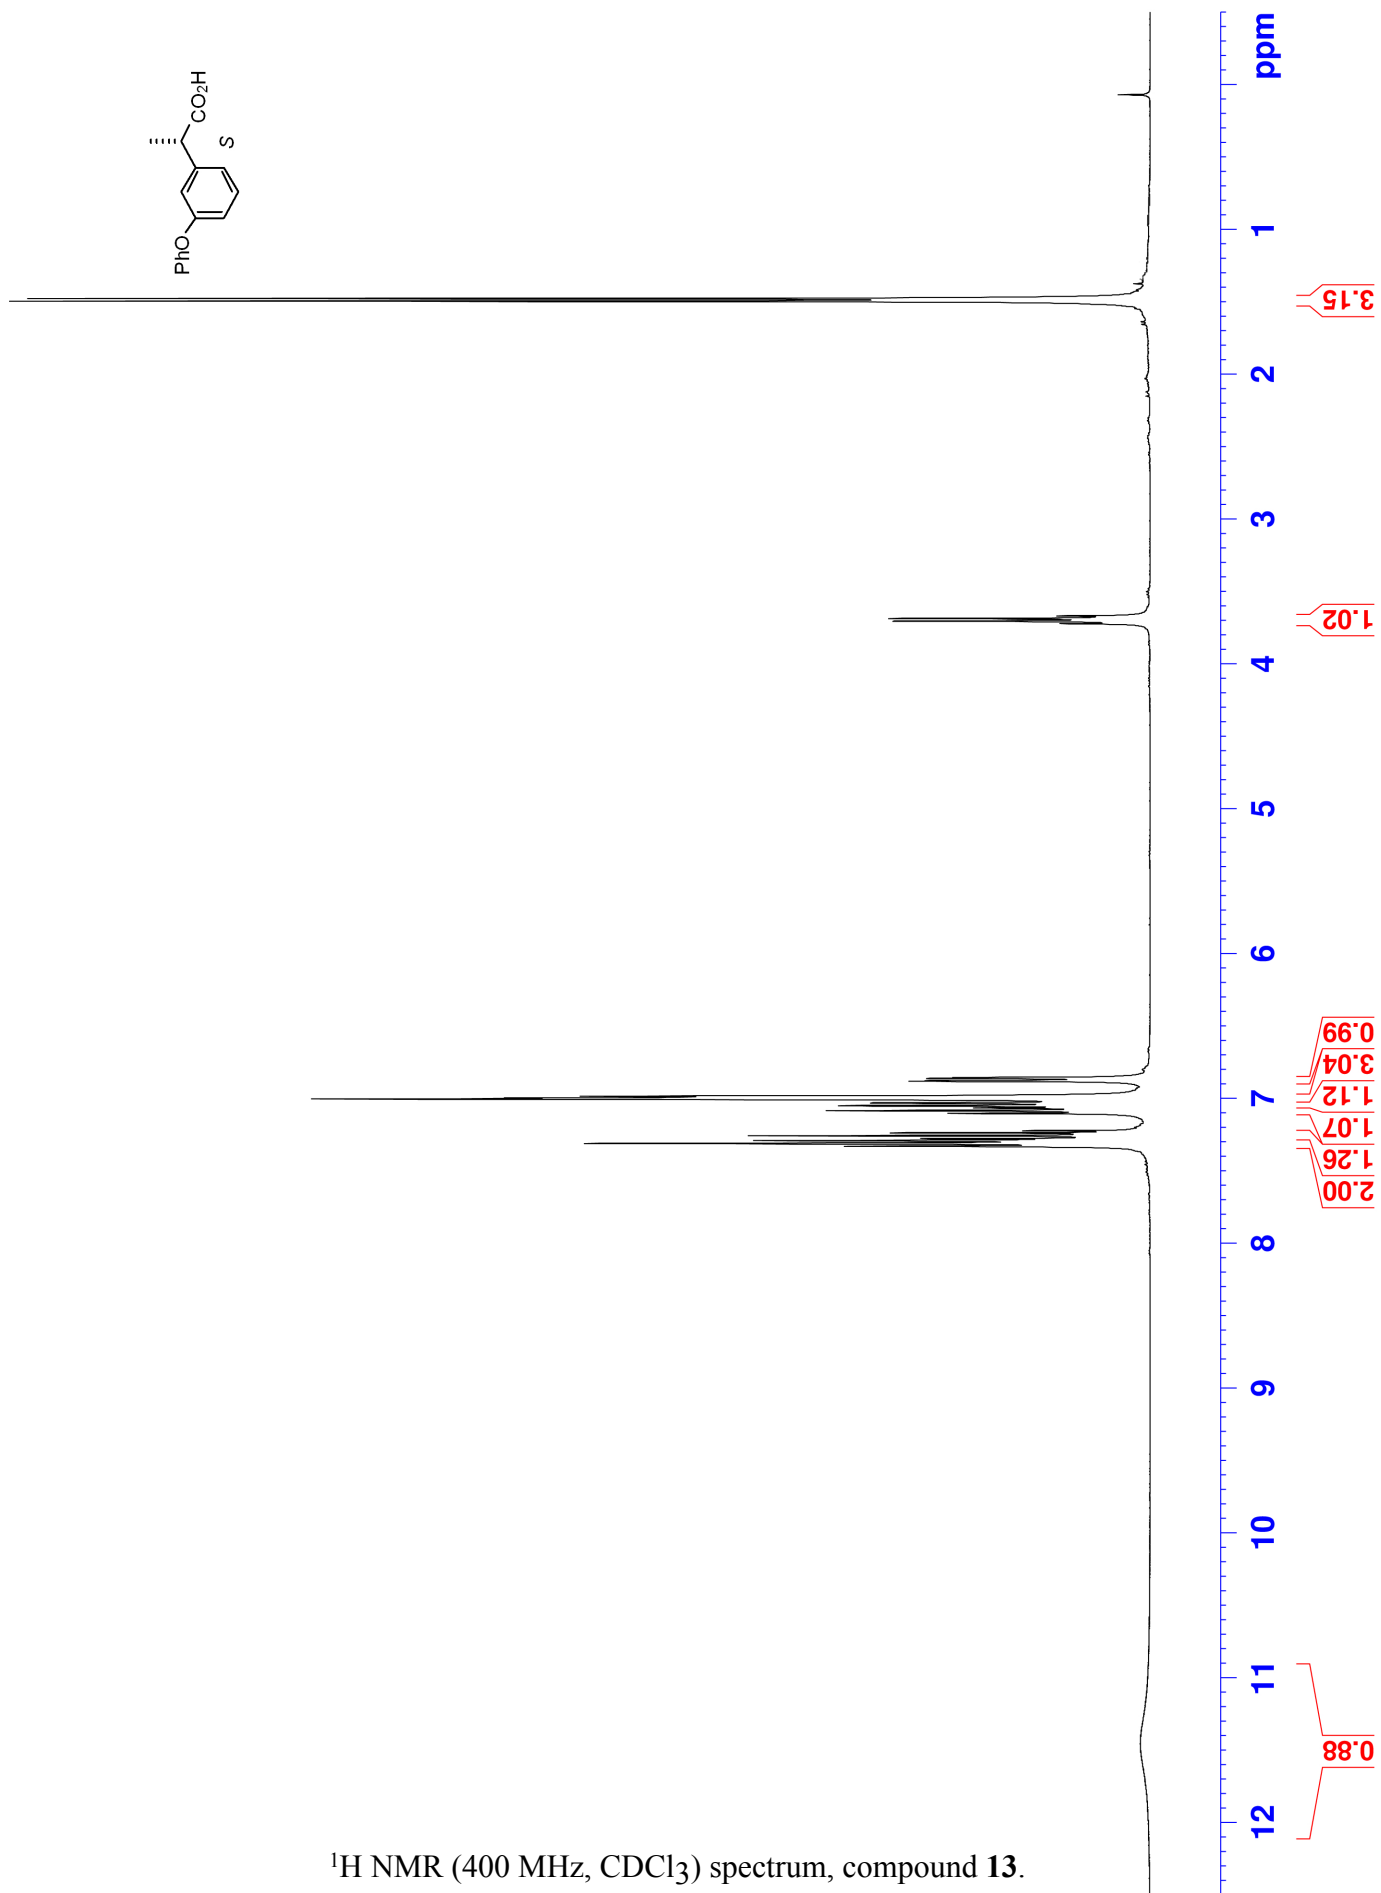

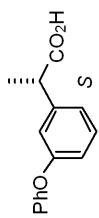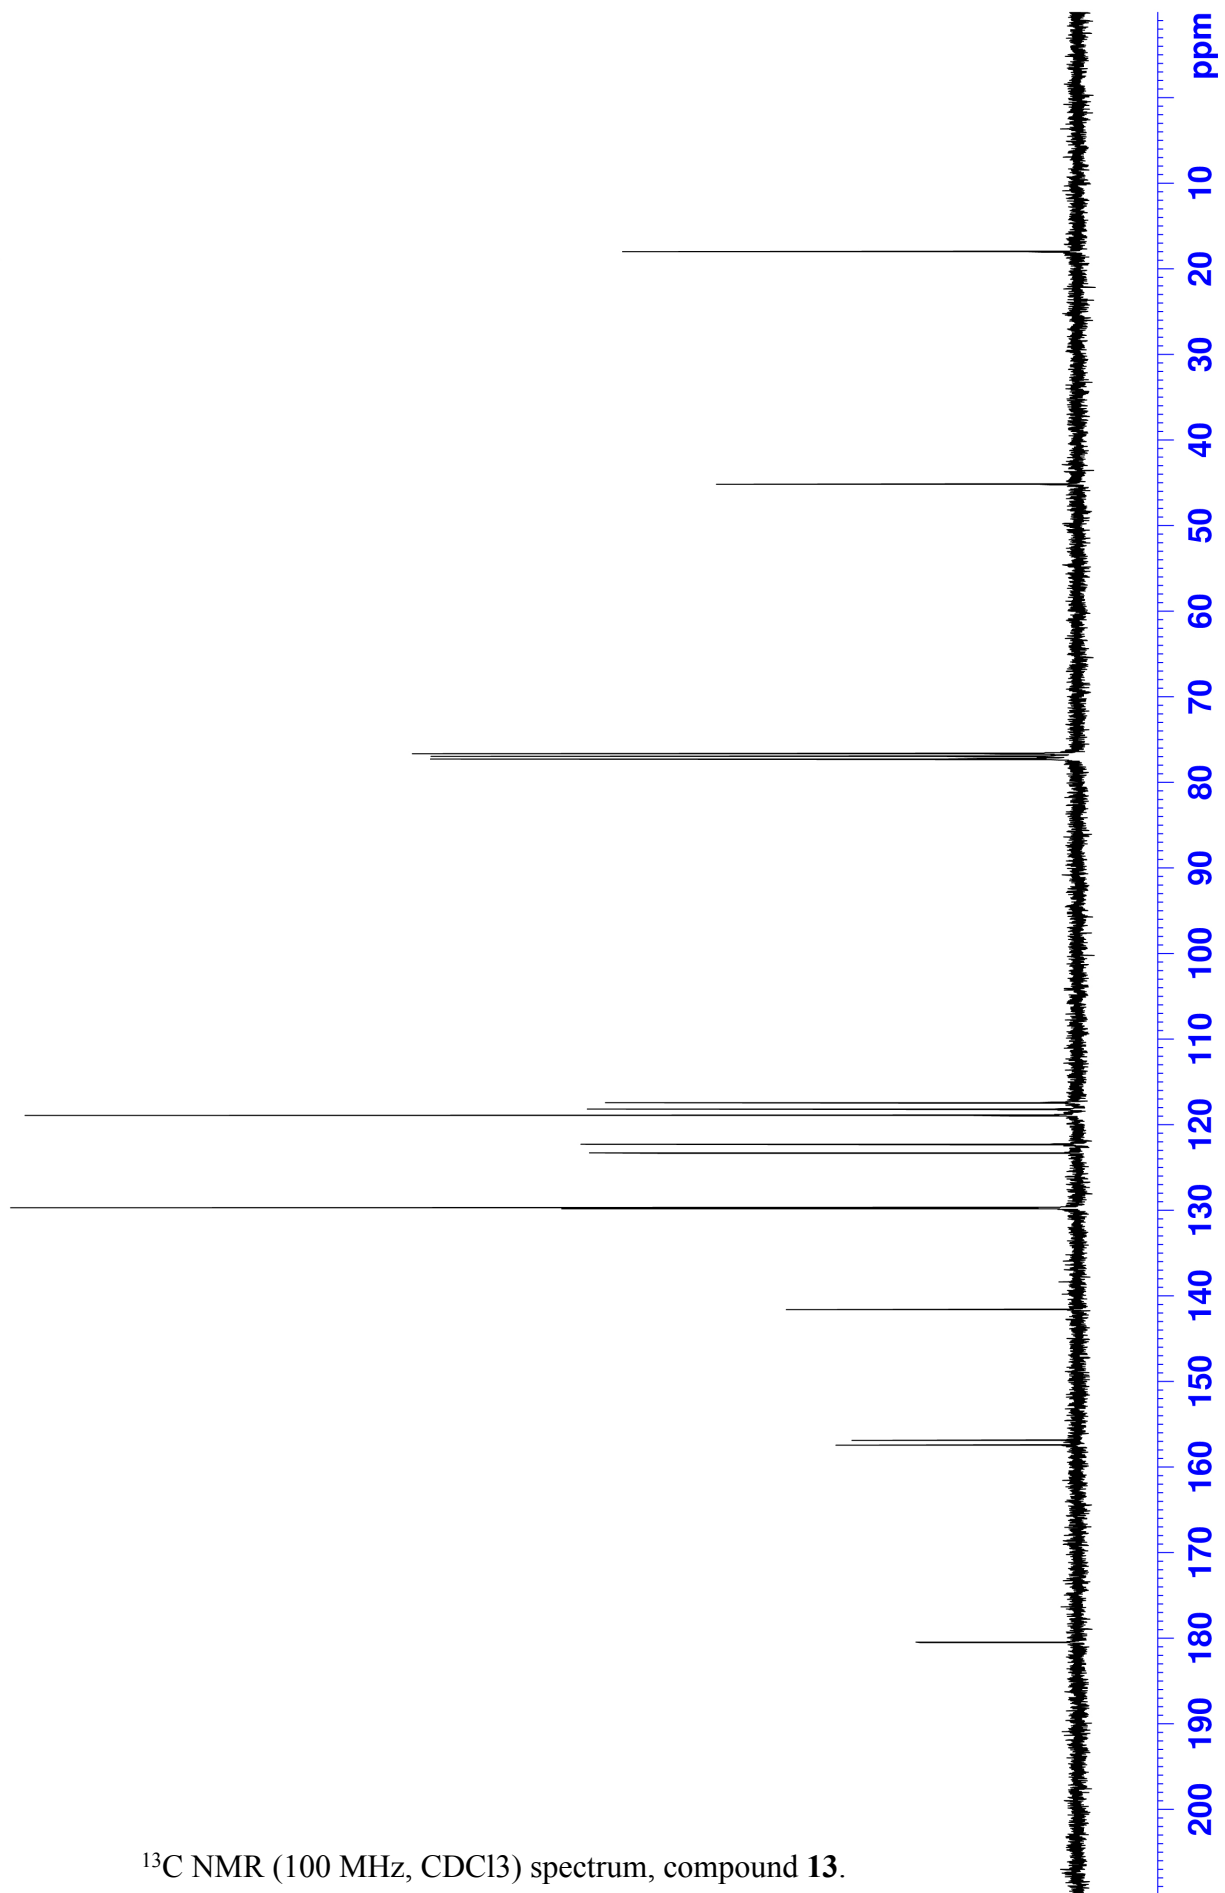

<sup>13</sup>C NMR (100 MHz, CDCl<sub>3</sub>) spectrum, compound 13.

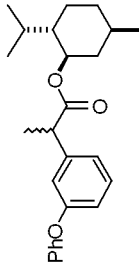

RUN# 214 APR 13, 1901 23:54:42  
 AREA% RT AREA TYPE WIDTH AREA  
 95.805 303850 WV .542 46.77824  
 94.329 345704 WV .565 53.22174  
 TOTAL AREA= 649554  
 MUL FACTOR=1.0000E+00  
 Error stopping signal to M: SIGNAL .BNC  
 ATTEMPTED WRITE PAST END OF FILE

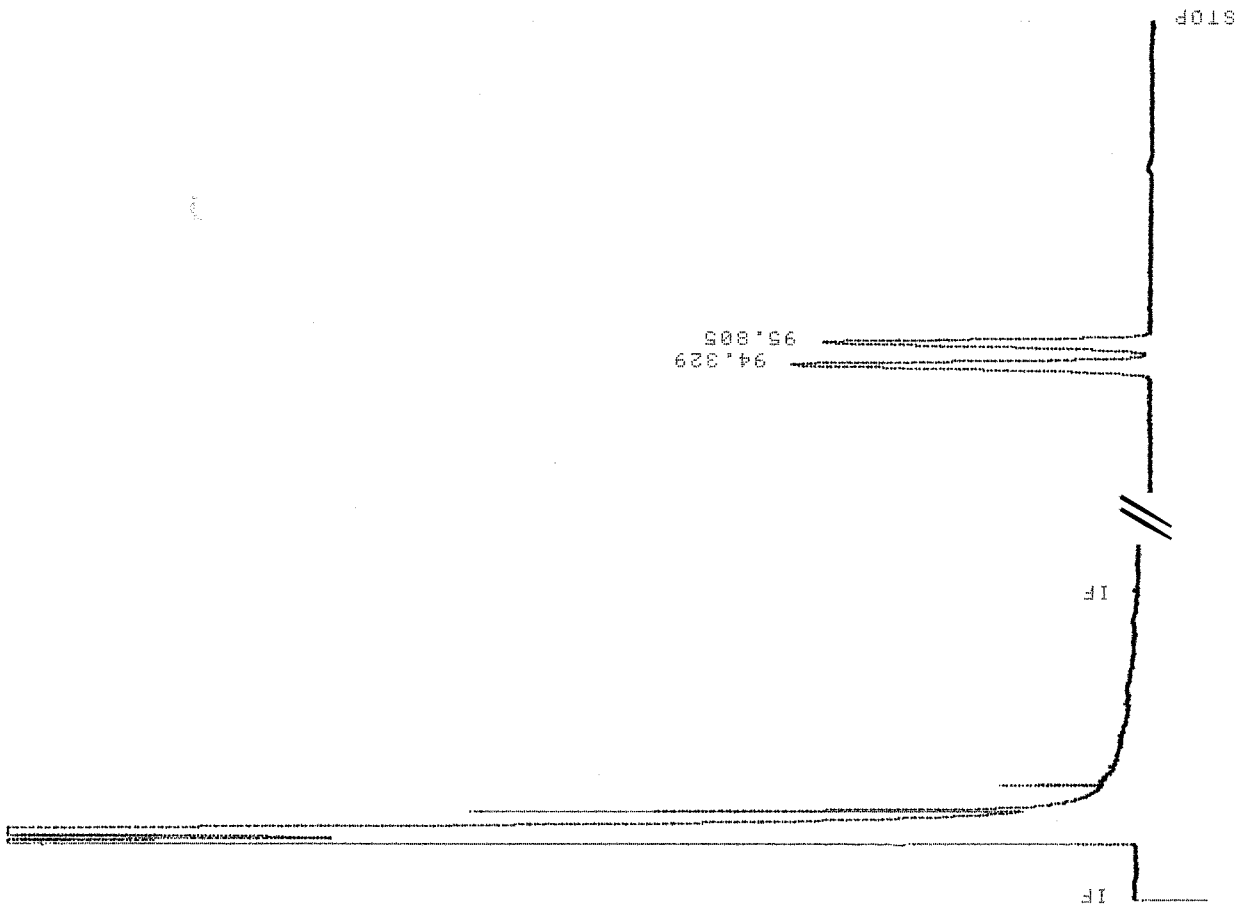

\* RUN # 214 APR 13, 1901 23:54:42  
 START  
 ZERO = 0.7072  
 ATT 2 = 2  
 CH1 SP = 0.2  
 AR RES = 5000  
 THRESH = 2  
 PK WD = 0.04

Chiral GC (Chirasil-S-Val): 120 min at 195°C;  
 L-menthyl ester of compound 13 (enriched).

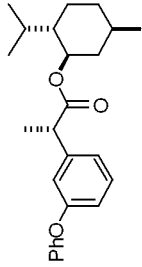

TOTAL AREA=1408758  
 MUL FACTOR=1.0000E+00

| RT     | AREA TYPE | WIDTH | AREA%    |
|--------|-----------|-------|----------|
| 22.300 | BV        | .110  | .19620   |
| 95.345 | VP        | .631  | 99.80381 |

RUN# 221 APR 14, 1901 21:42:26

Error storing signal to M: SIGNAL, BNC  
 ATTEMPTED WRITE PAST END OF FILE

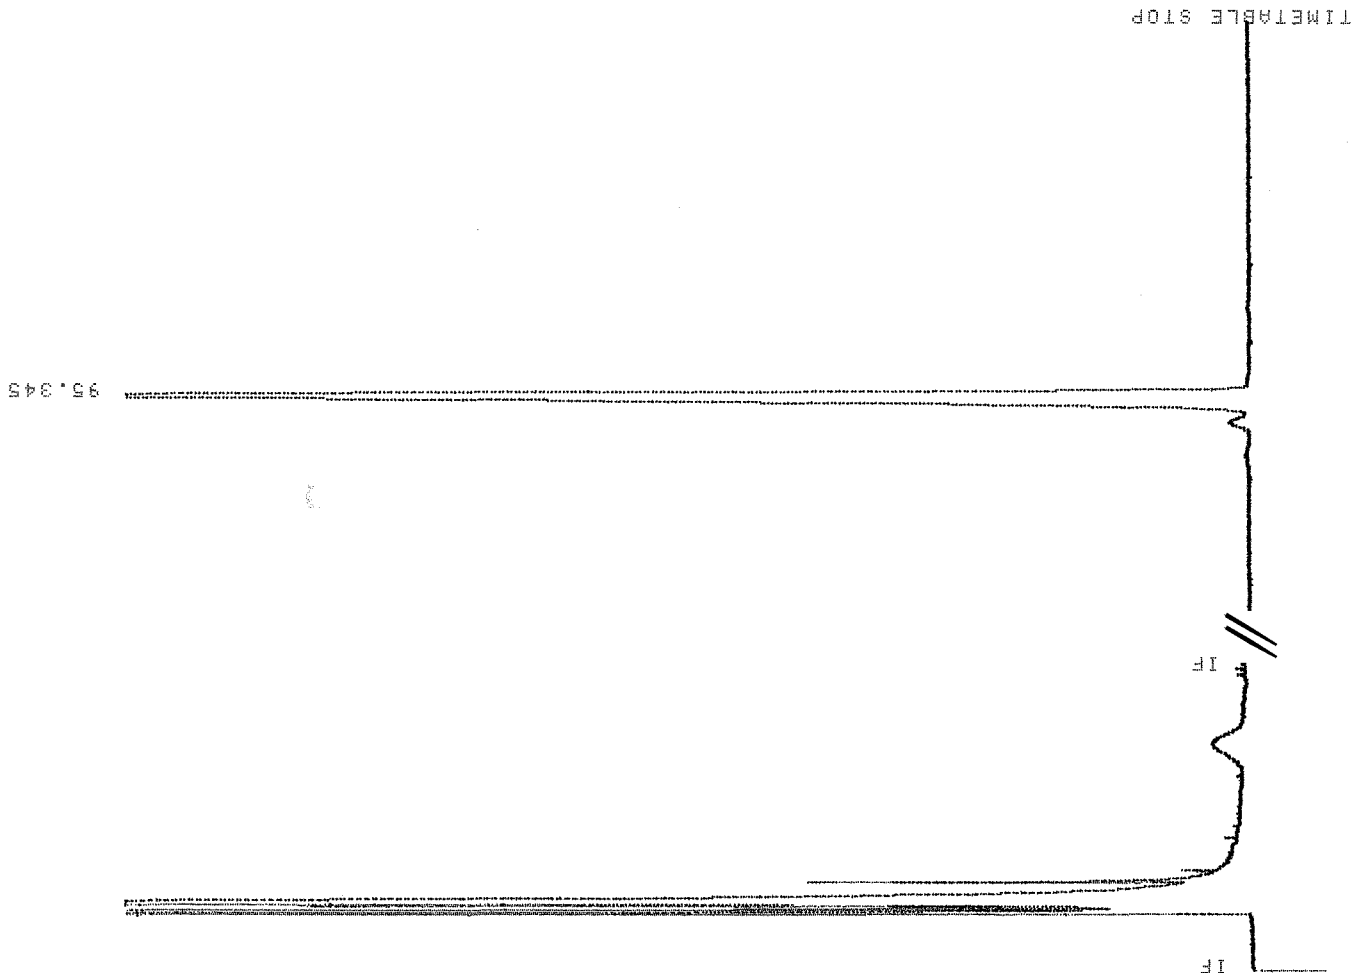

START  
 \* RUN # 221 APR 14, 1901 21:42:26

\* AR REJ 2500 @  
 \*  
 \*  
 ZERO = 0.2660  
 ATT 2 = 2  
 CH1 SP = 0.2  
 AR REJ = 250  
 THRS = 1  
 PK WD = 0.04

\* LIST: LIST  
 PEAK CAPACITY: 1243

Chiral GC (Chirasil-S-Val): 120 min at 195°C;  
 L-menthyl ester of compound 13 (from 5).

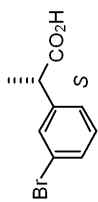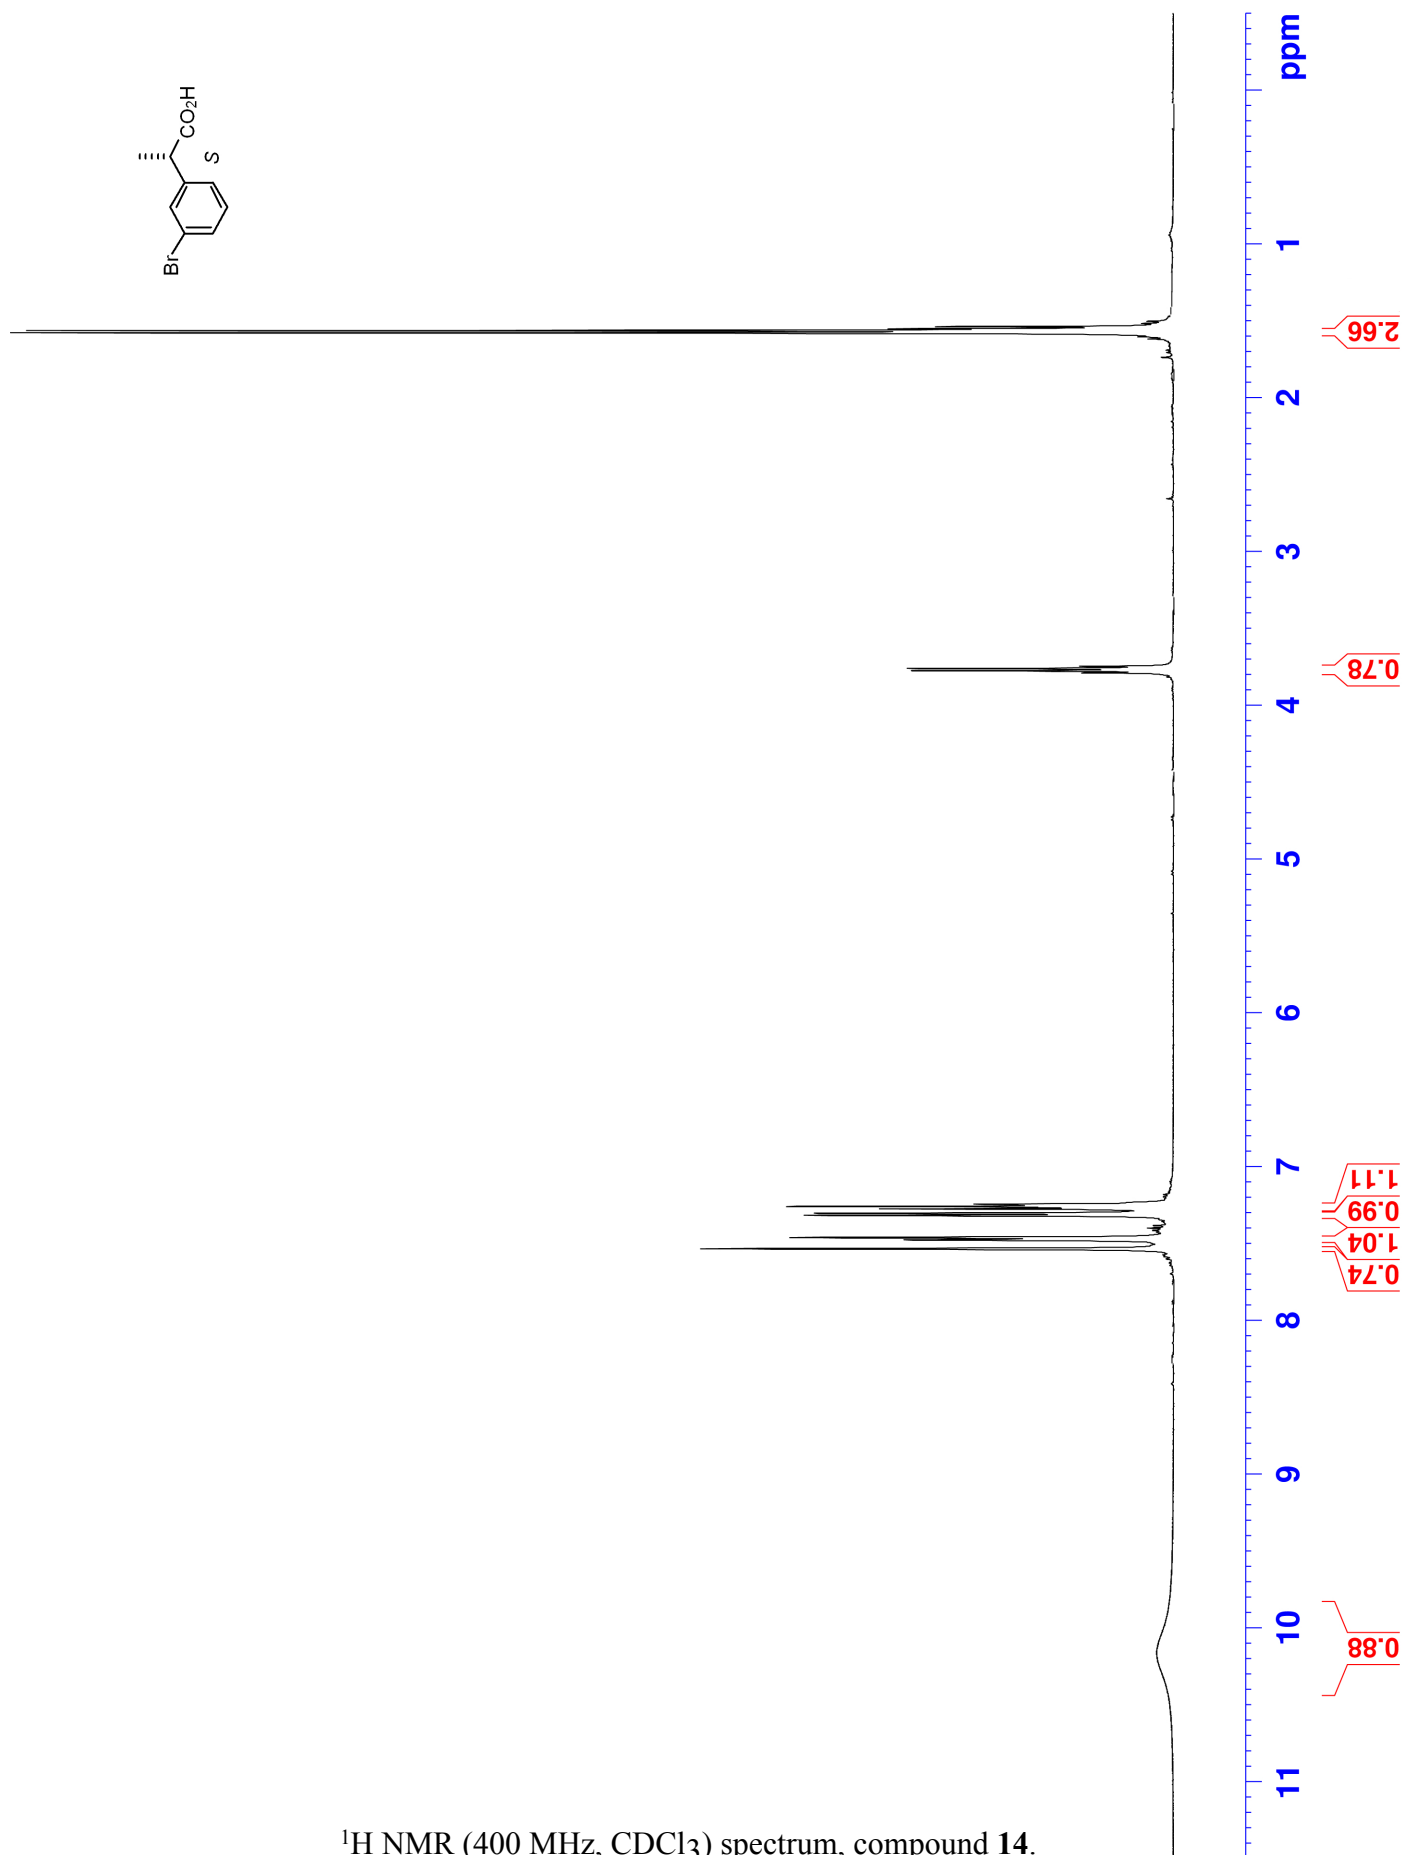

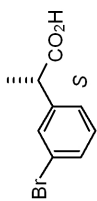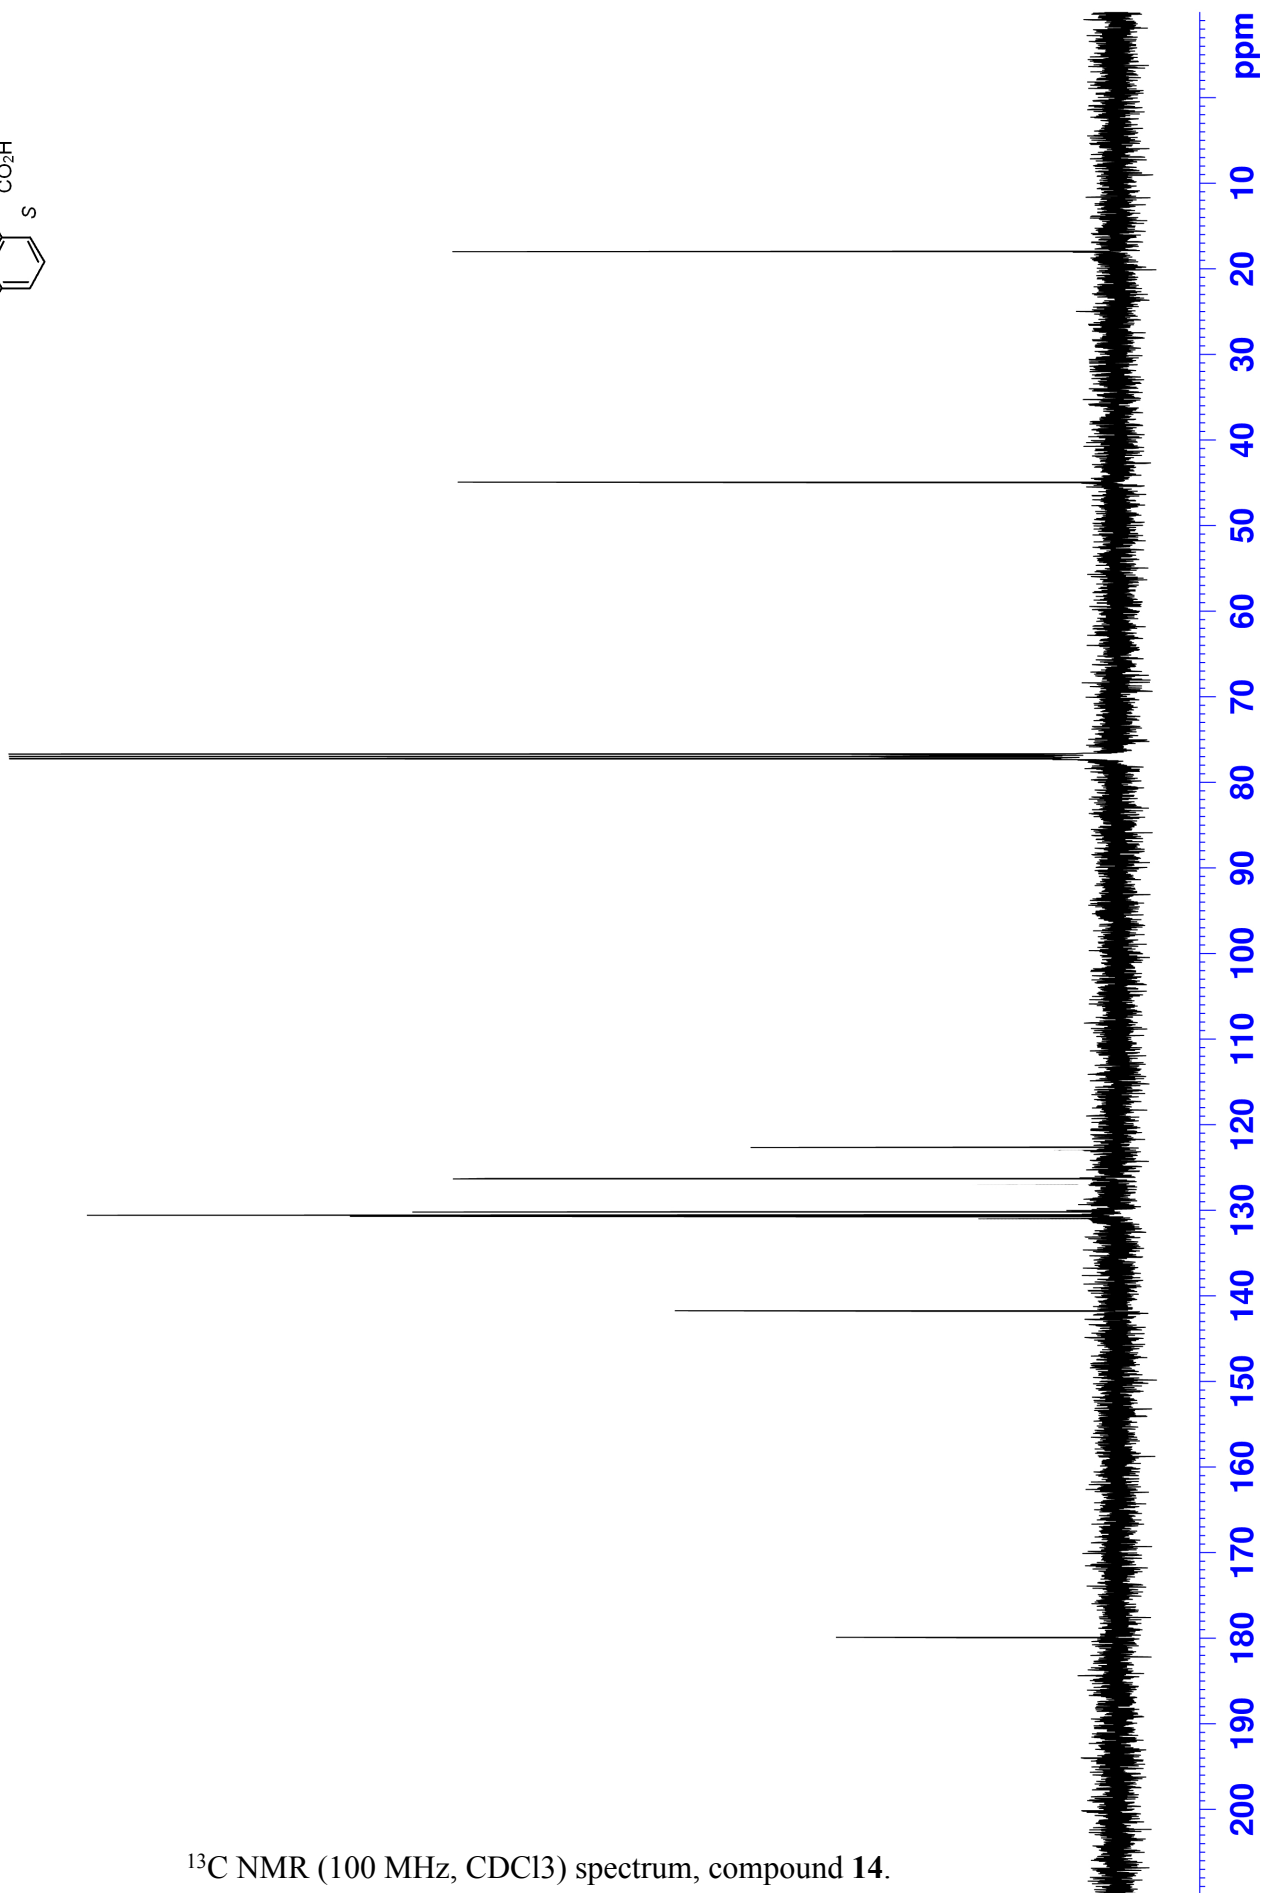

<sup>13</sup>C NMR (100 MHz, CDCl<sub>3</sub>) spectrum, compound 14.



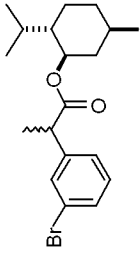

MUL FACTOR=1.0000E+00  
 TOTAL AREA= 424005  
 26.698 191996 VP .151 45.28154  
 25.720 232009 BP .145 54.71845  
 AREA% RT AREA TYPE WIDTH AREA  
 RUN# 199 APR 8, 1901 22:25:25  
 Error storing signal to M: SIGNAL .BNC  
 ATTEMPTED WRITE PAST END OF FILE

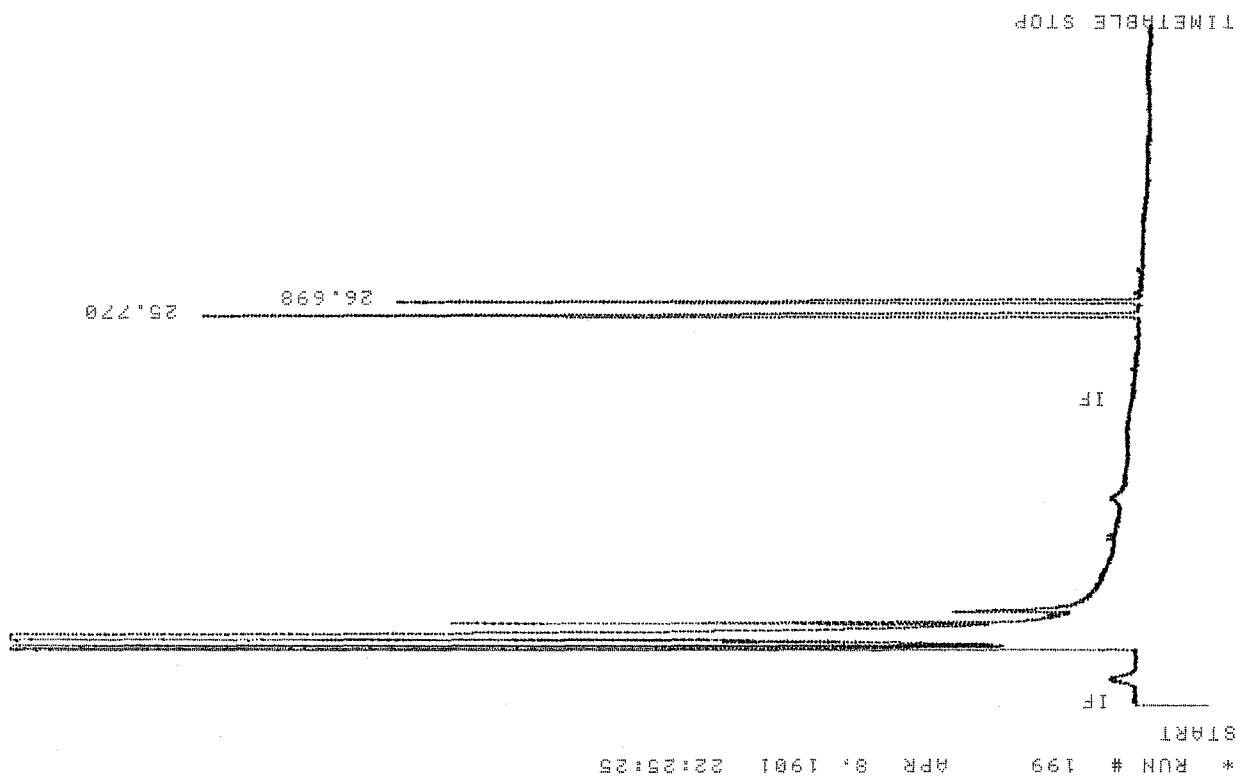

\* LIST: LIST  
 PEAK CAPACITY: 1243  
 ZERO = 0.9425  
 ATT 2 = 2  
 CHT SP = 0.2  
 AR REJ = 5000  
 THRSH = 2  
 PK WD = 0.04

Chiral GC (Chirasil-S-Val): 45 min at 190°C;  
 (racemic mixture) (L)-menthyl esters of **14**  
 (enriched).

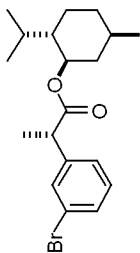

MULTI FACTOR=1.0000E+00  
 TOTAL AREA= 274143  
 26.676 262038 BP .150 95.58445  
 25.733 12105 PP .139 4.41550  
 RT AREA TYPE WIDTH AREA%  
 RUN# 202 APR 9, 1901 00:48:09

ERROR STOPPING SIGNAL TO M: SIGNAL .BNC  
 ATTEMPTED WRITE PAST END OF FILE

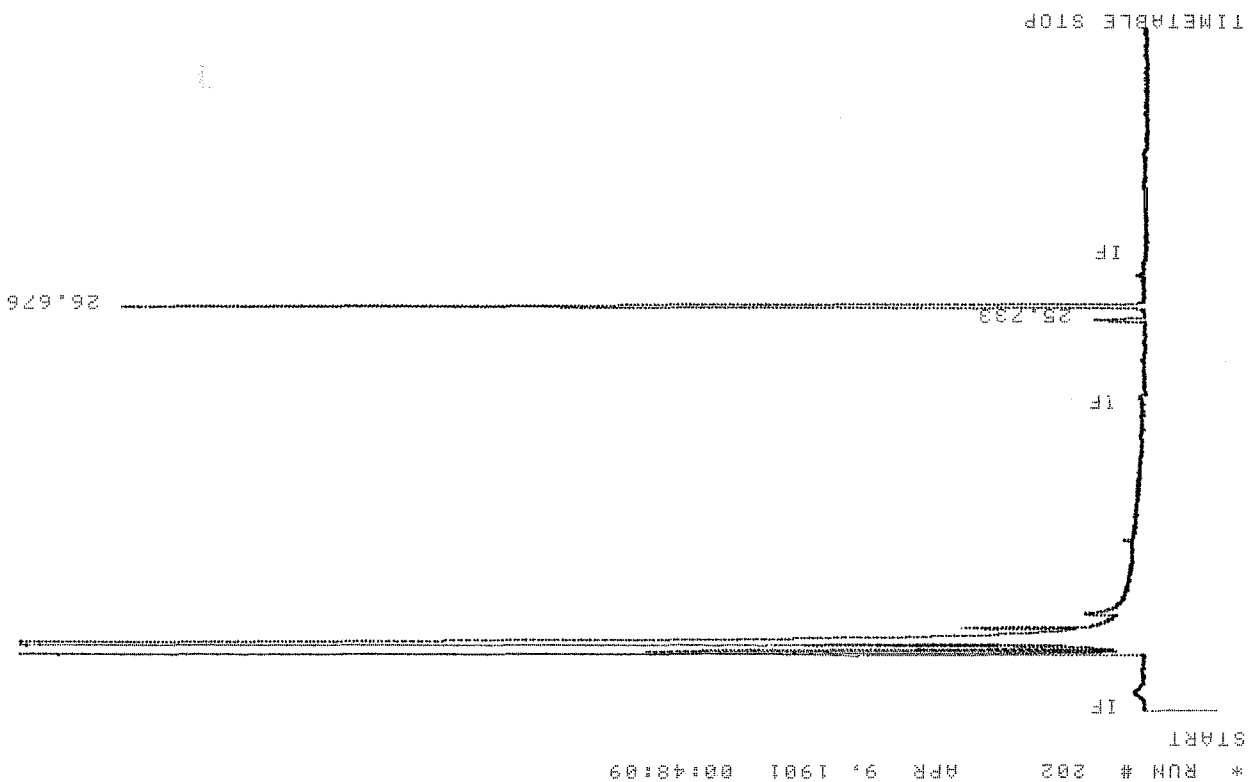

\* RUN # 202 APR 9, 1901 00:48:09  
 START  
 ZERO = 0, 9,304  
 ATT 2 = 2  
 CHT SP = 0.2  
 AR REJ = 5000  
 THRESH = 2  
 PK WD = 0.04  
 \* LIST: LIST  
 PEAK CAPACITY: 1243

Chiral GC (Chirasil-S-Val): 45 min at 190°C;  
 (L)-menthyl ester of **14** from **6**.

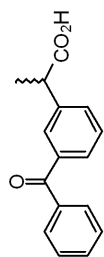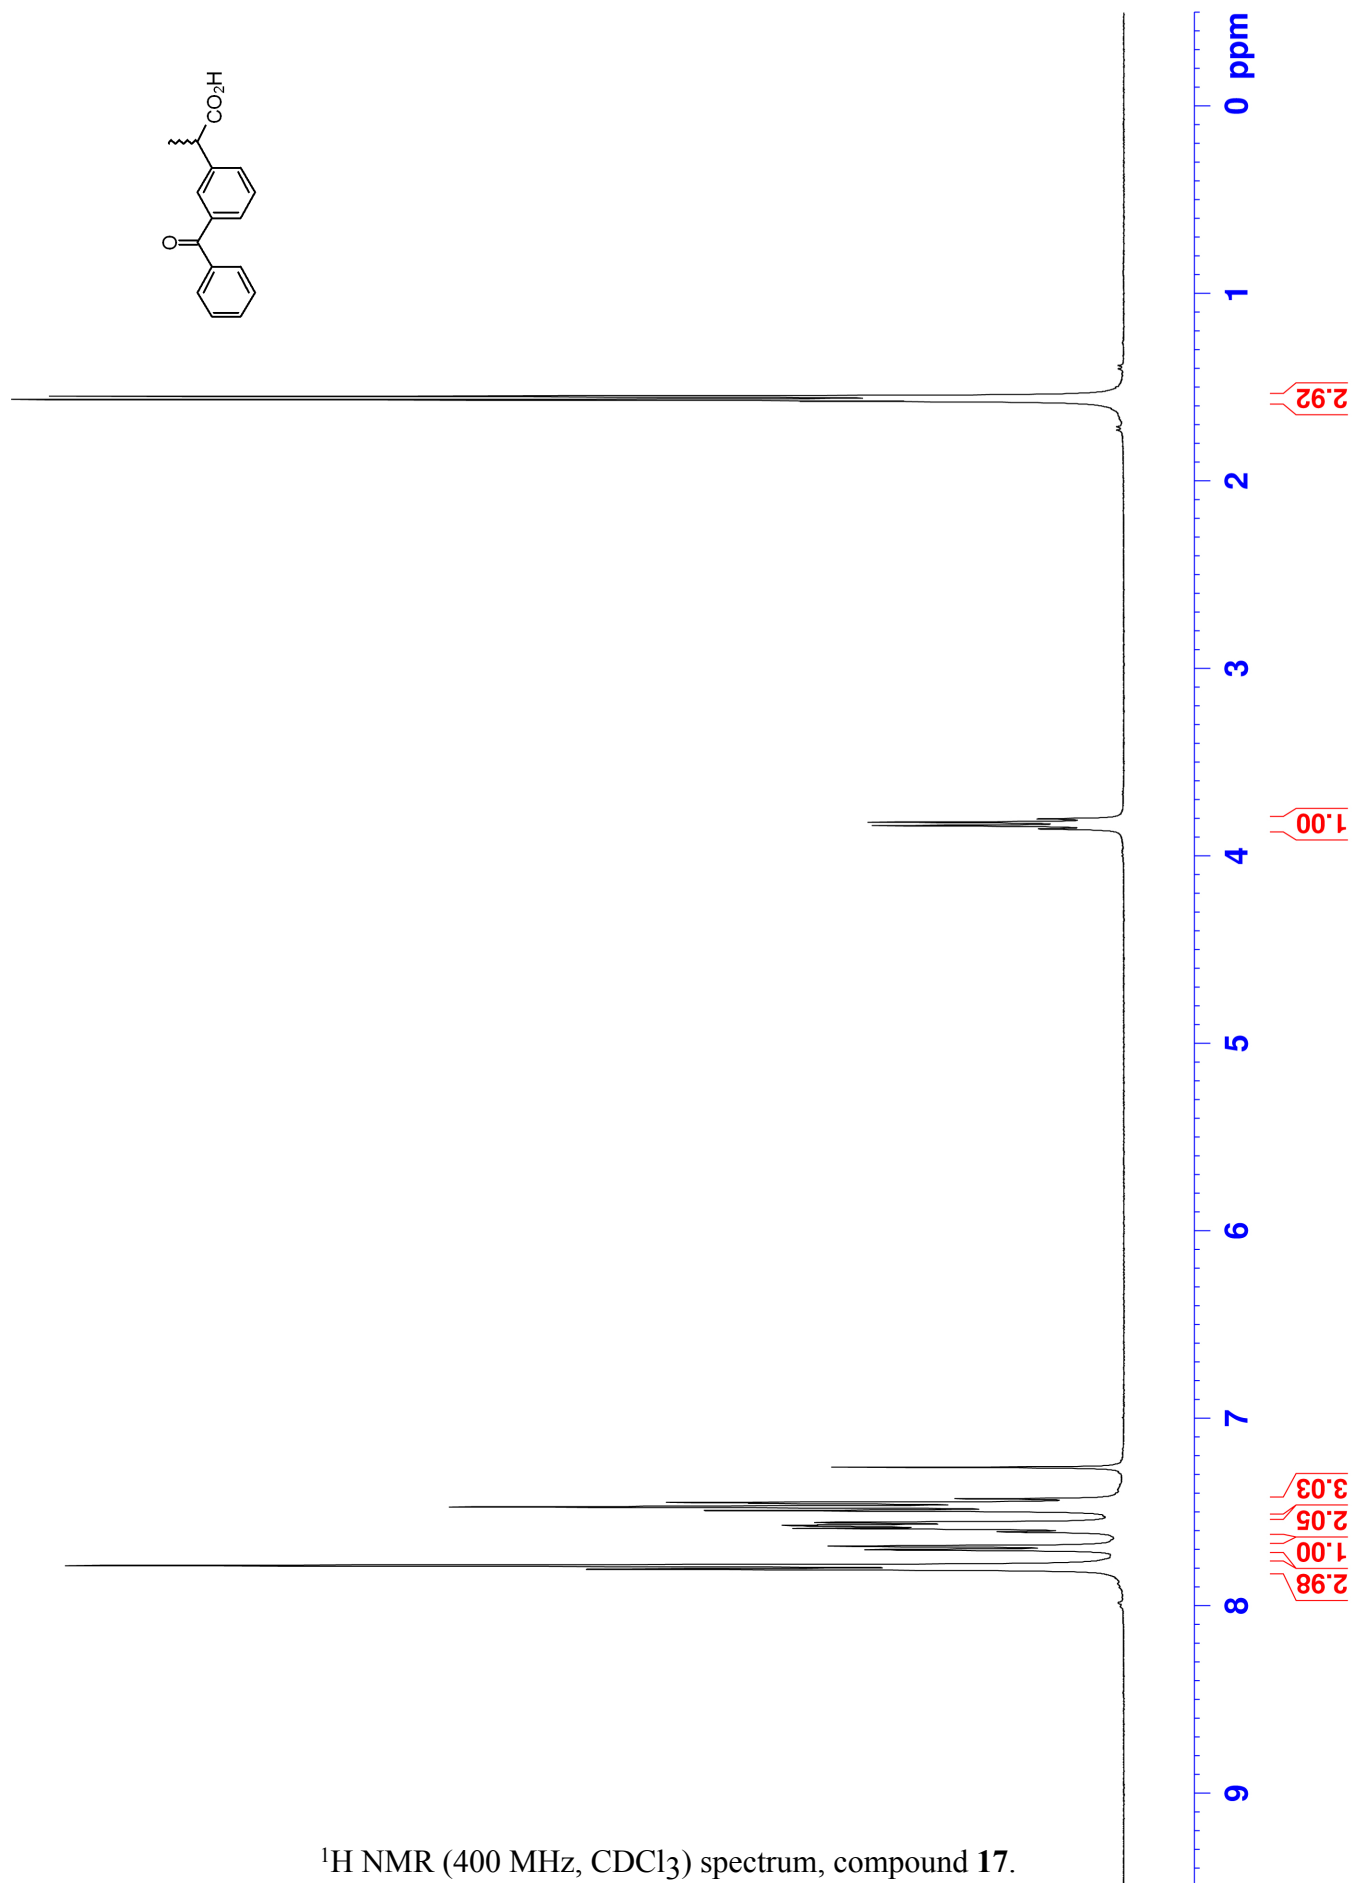

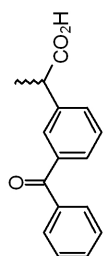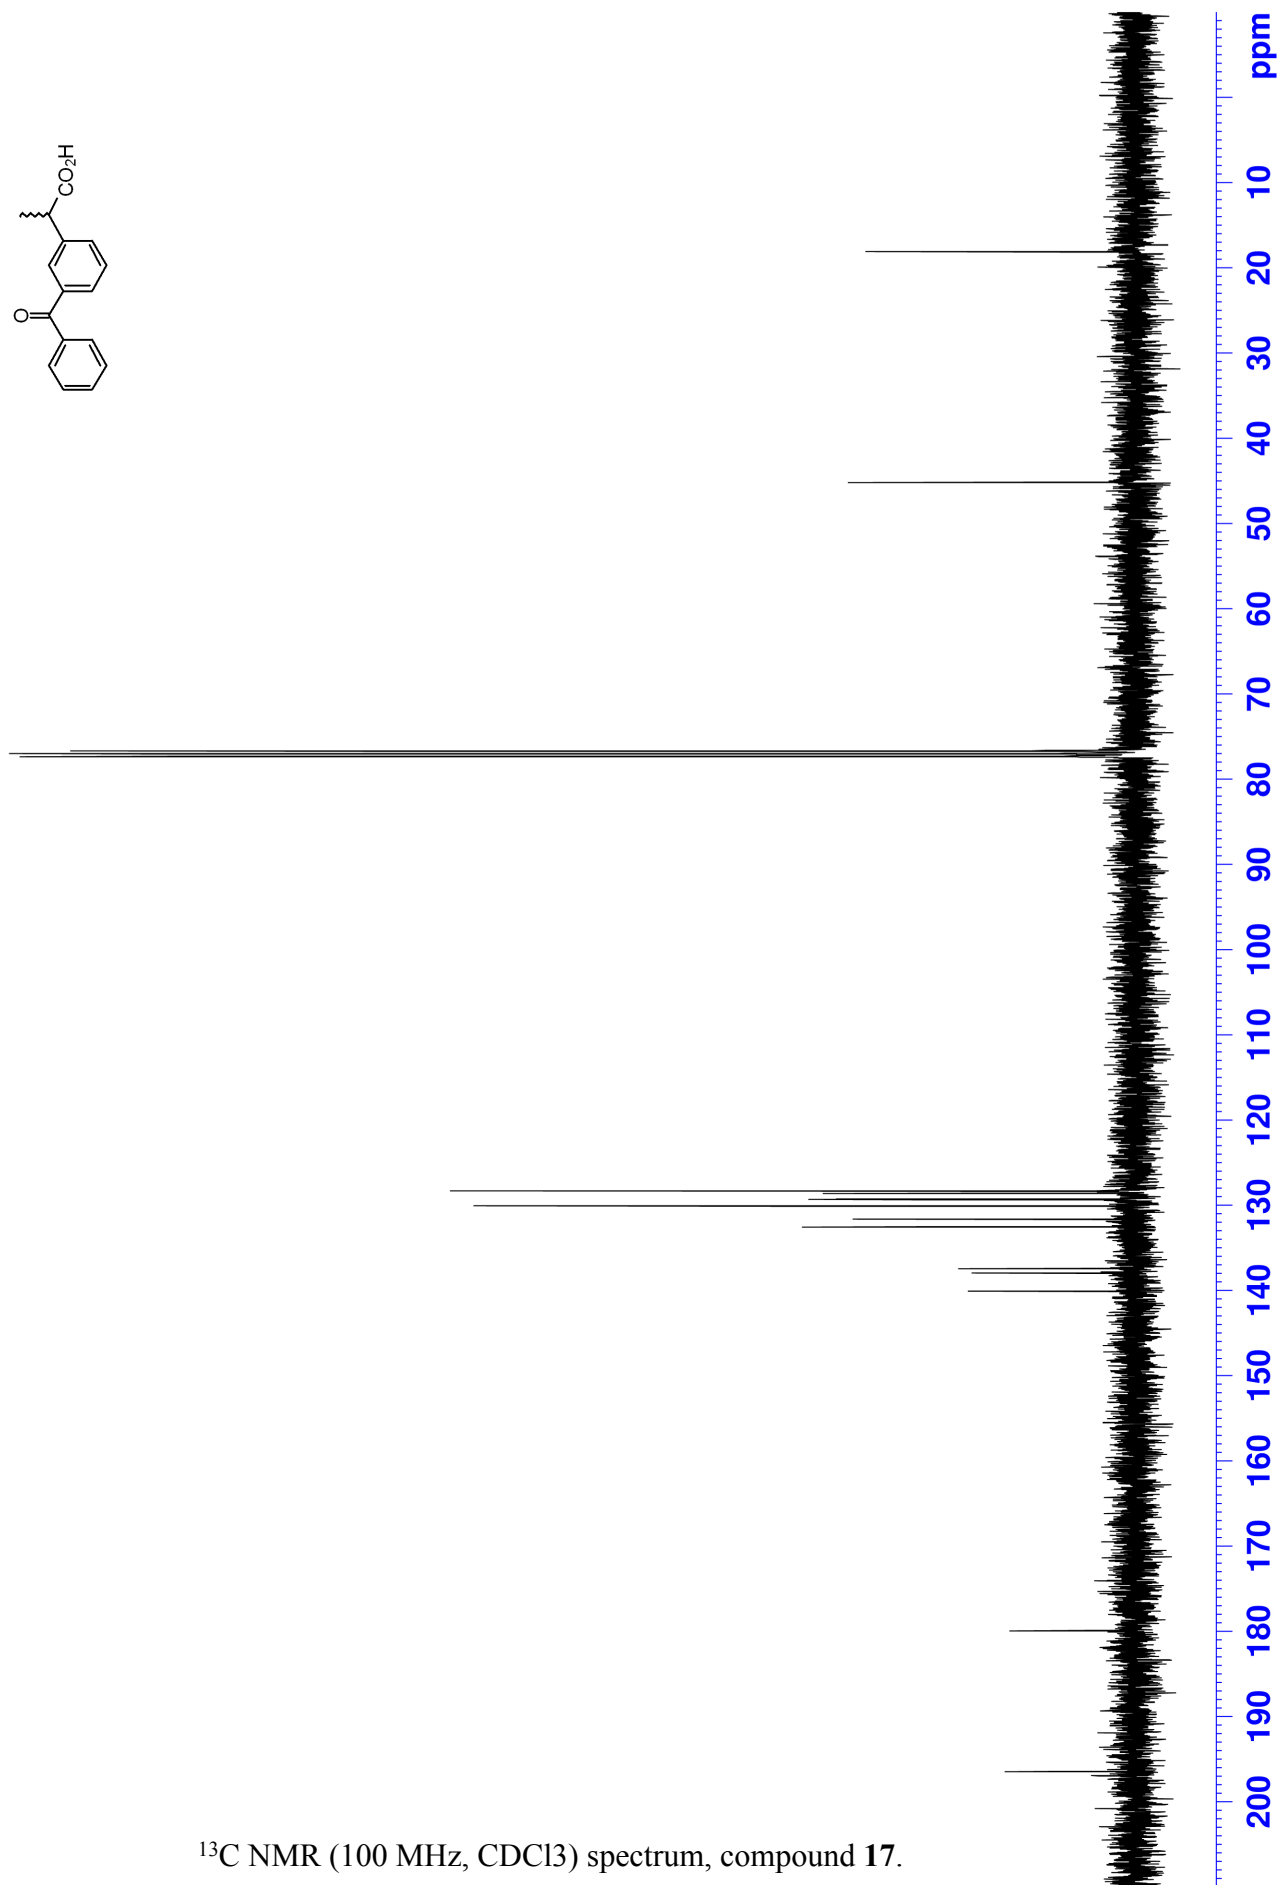

<sup>13</sup>C NMR (100 MHz, CDCl<sub>3</sub>) spectrum, compound 17.

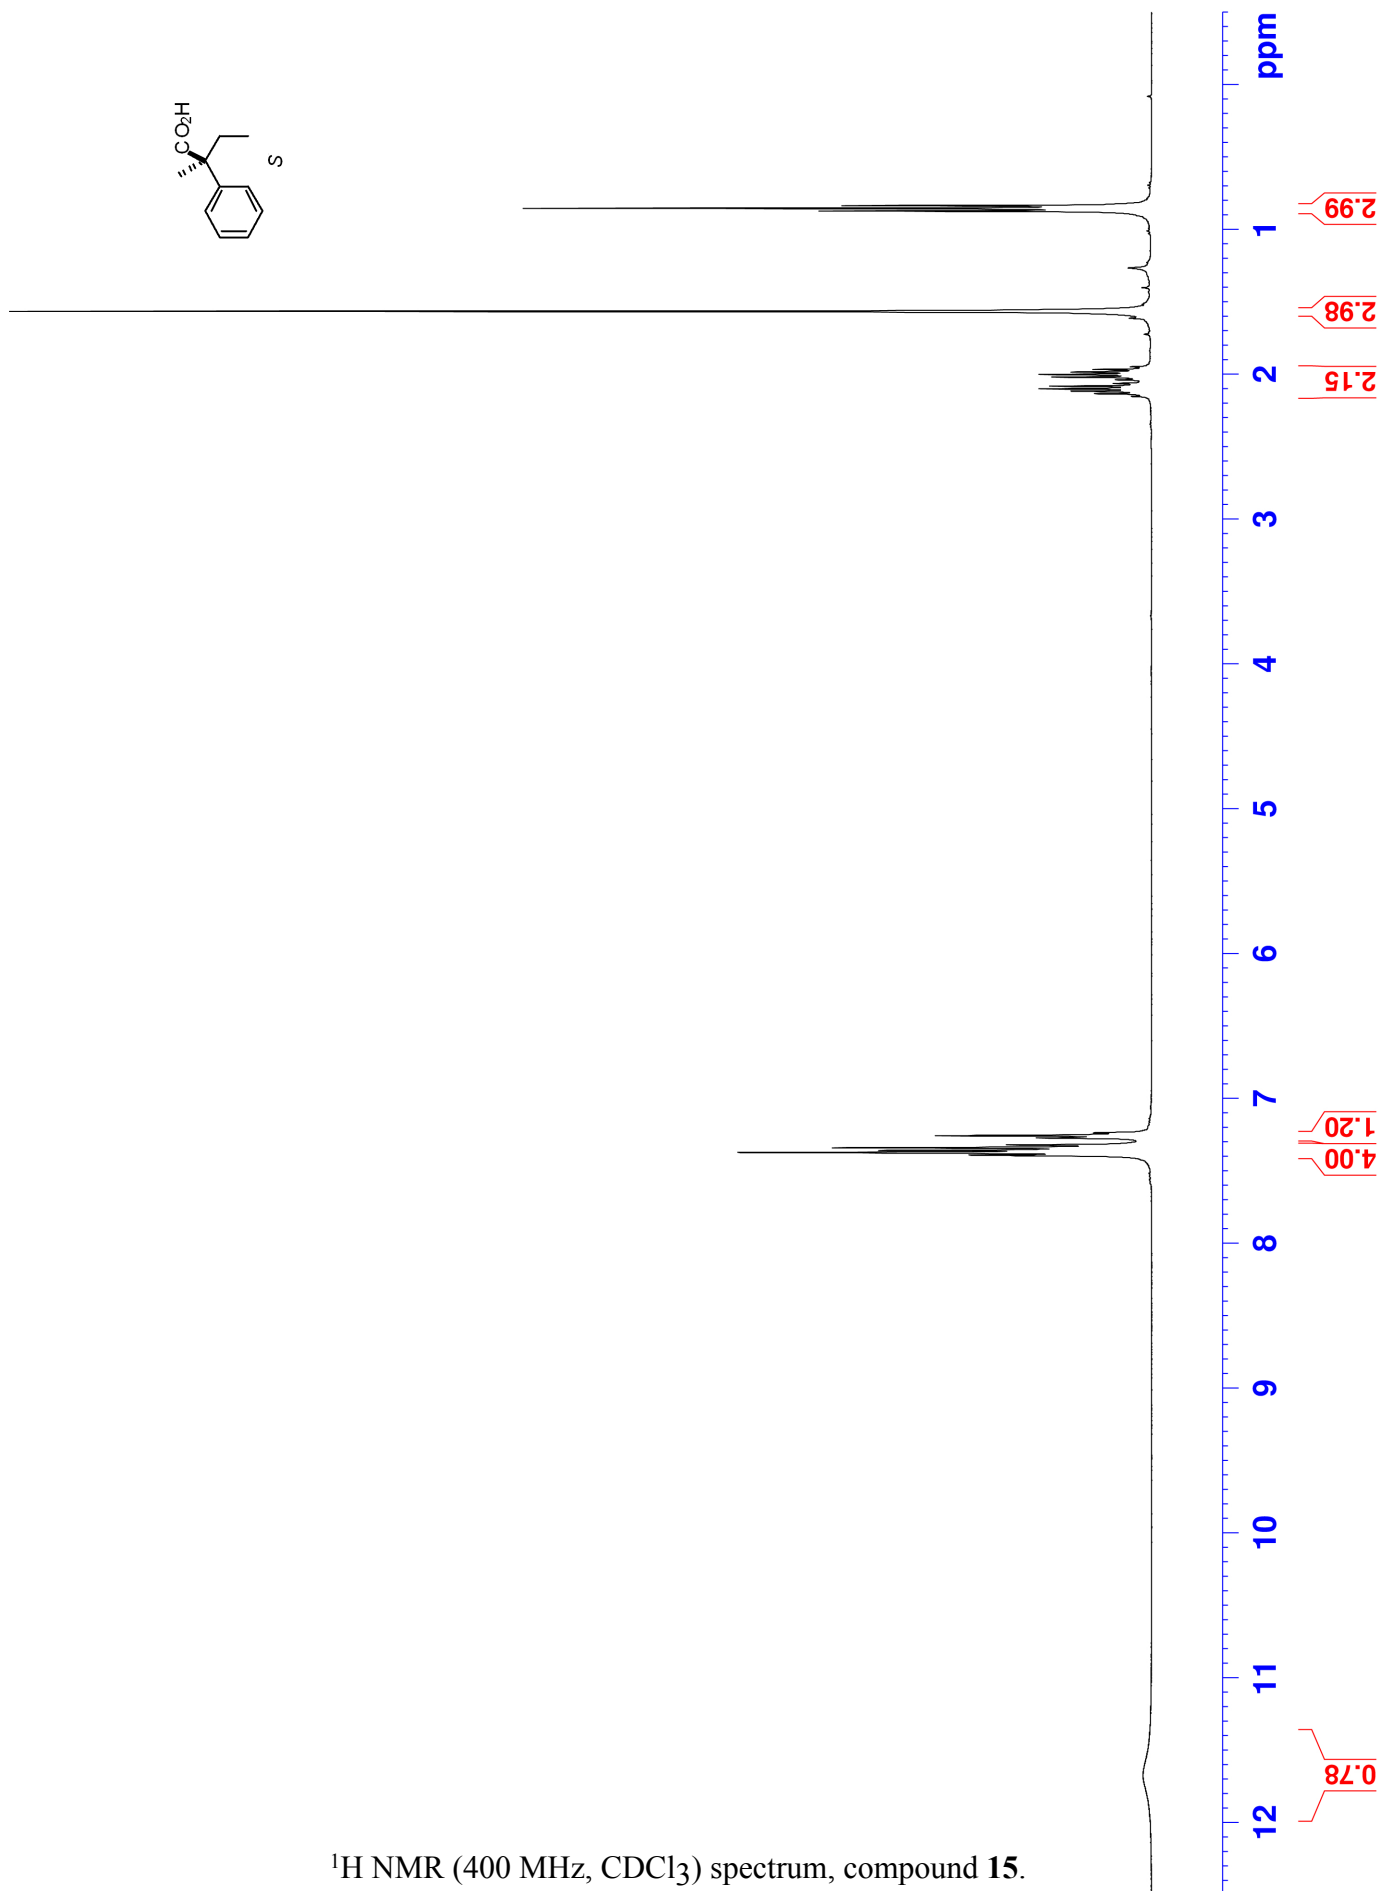

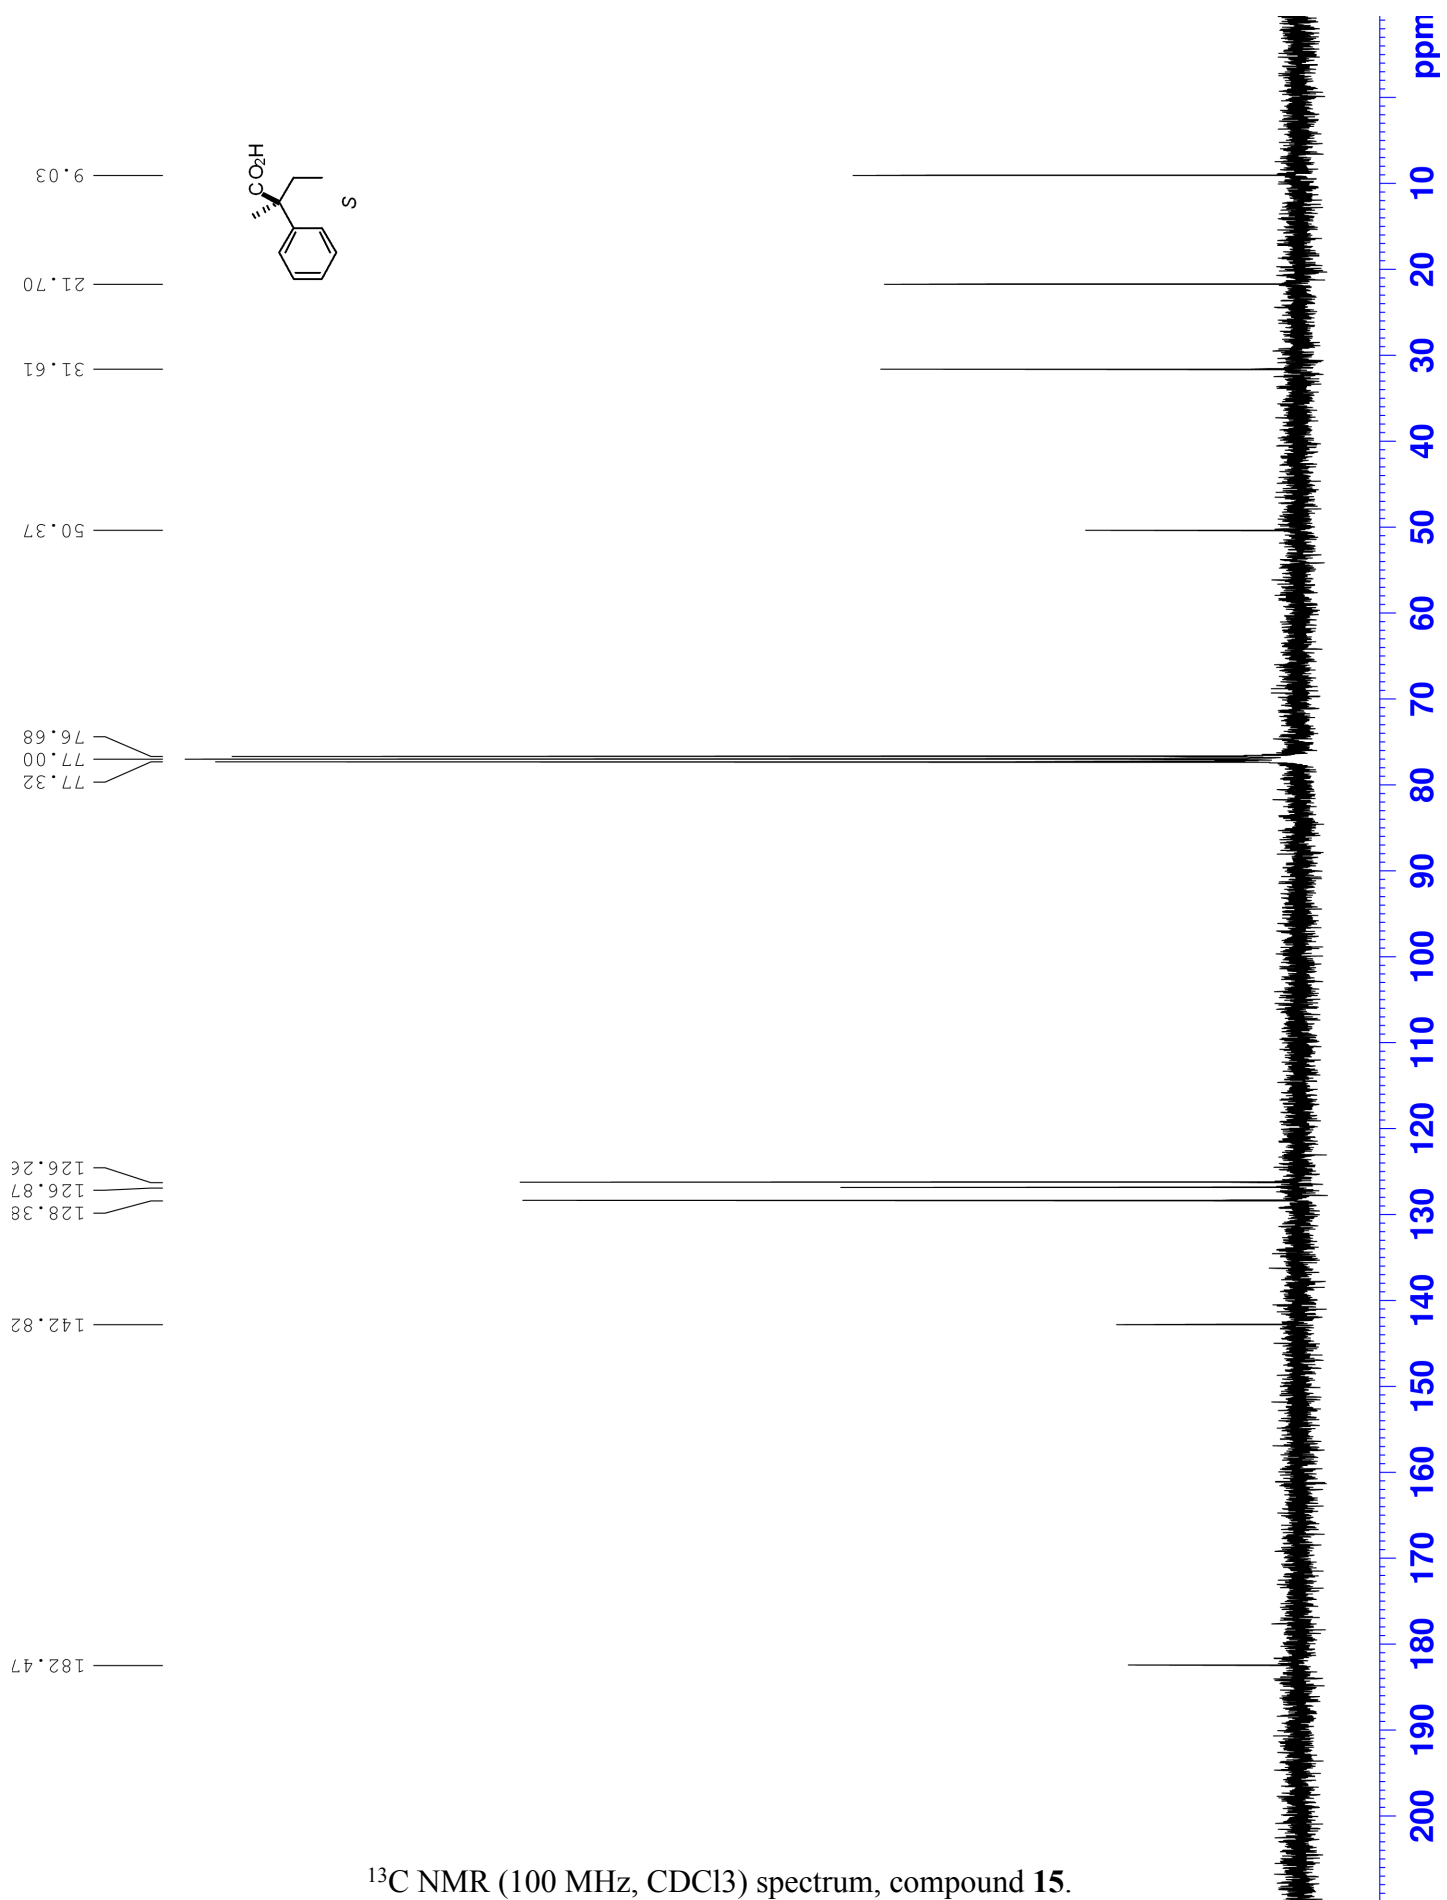

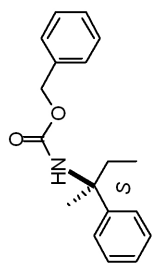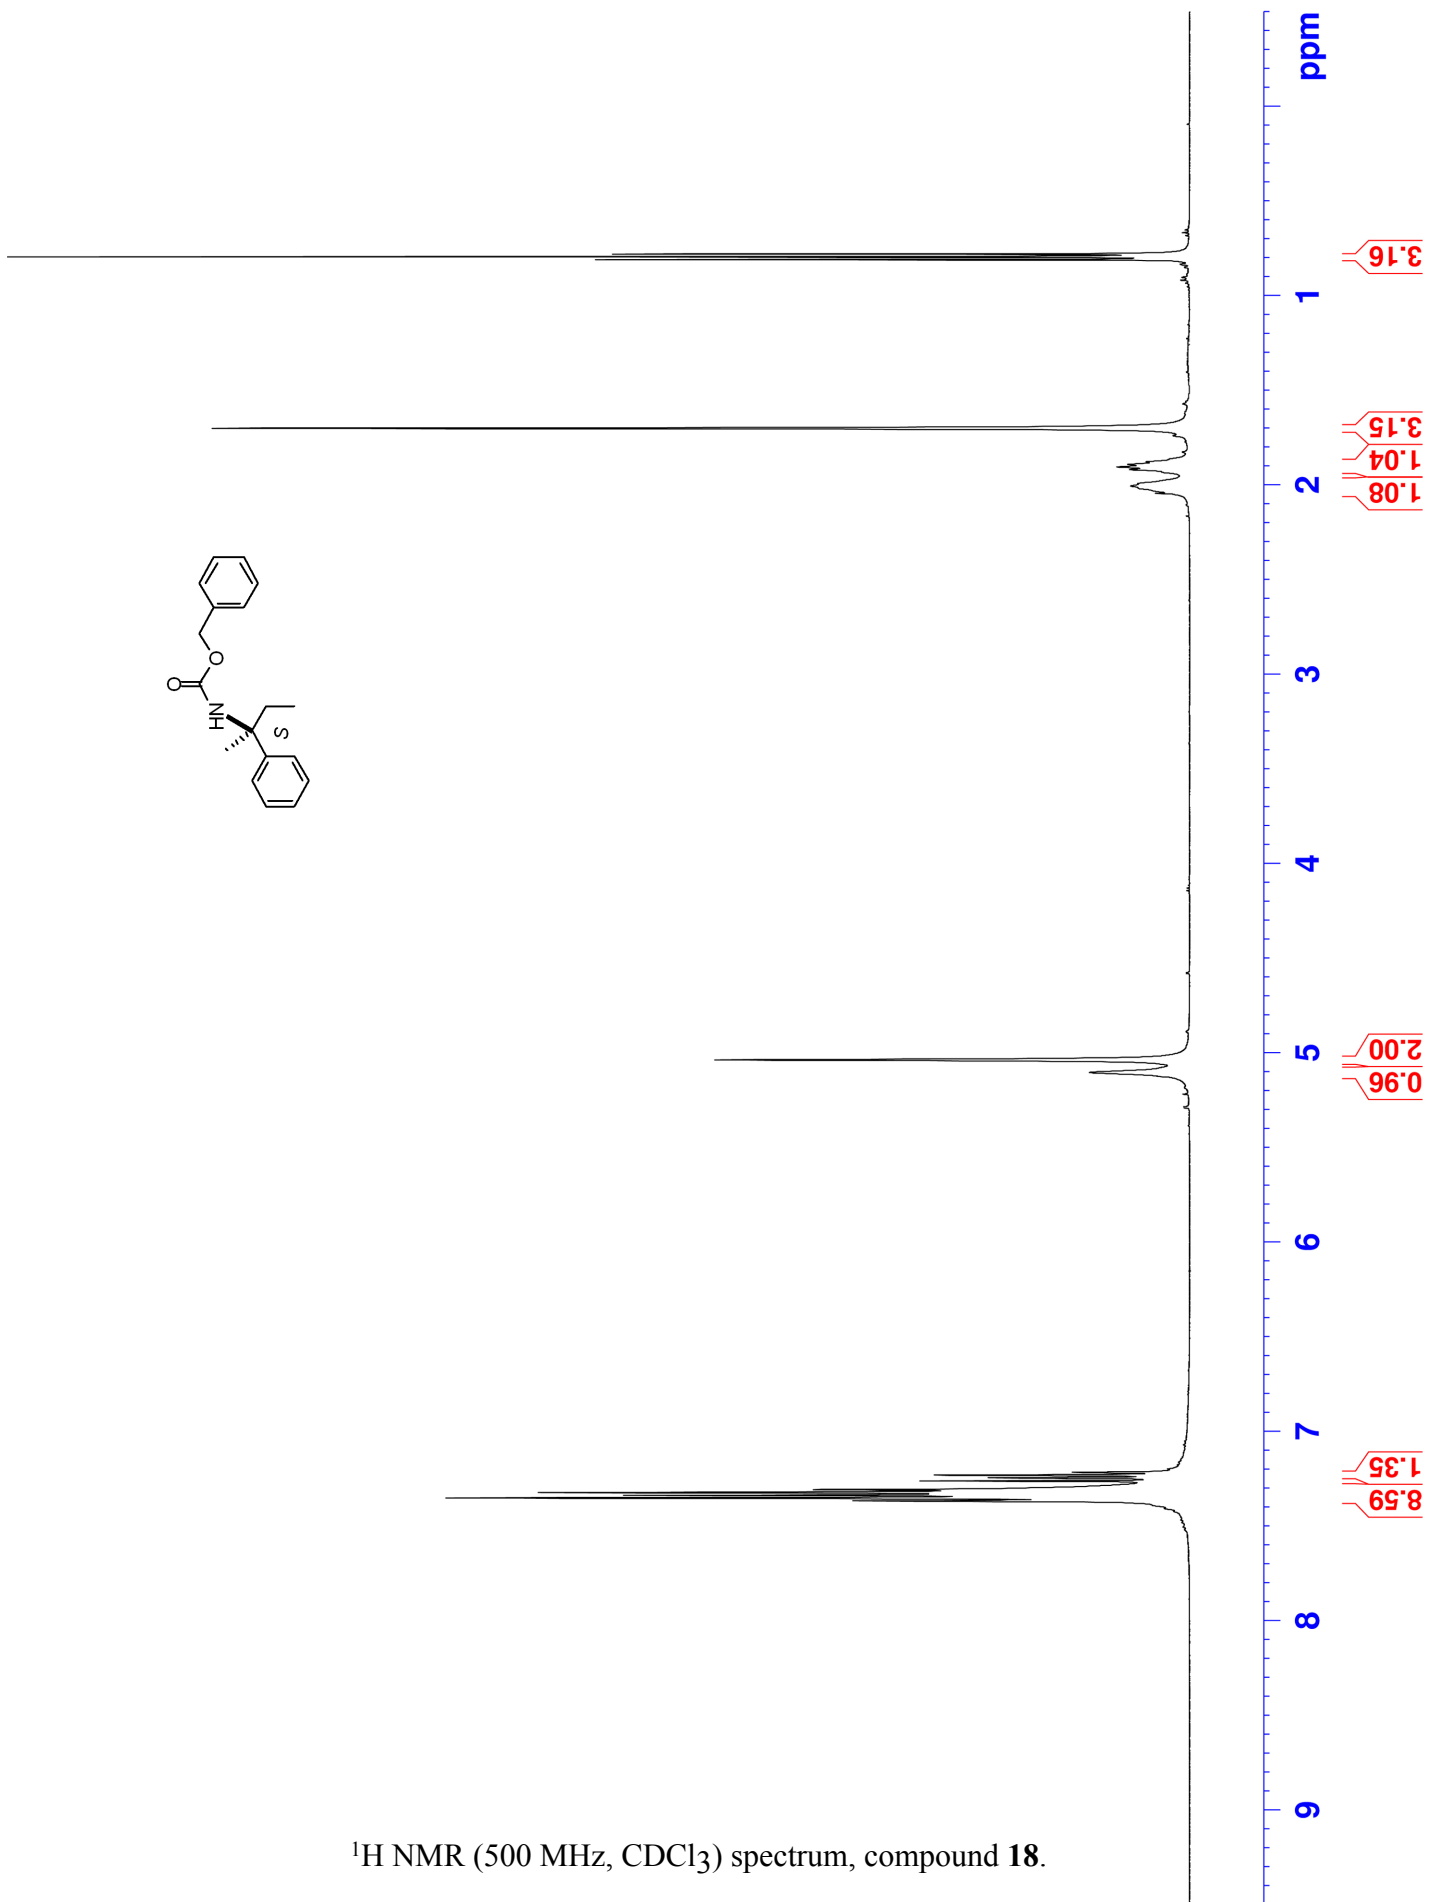

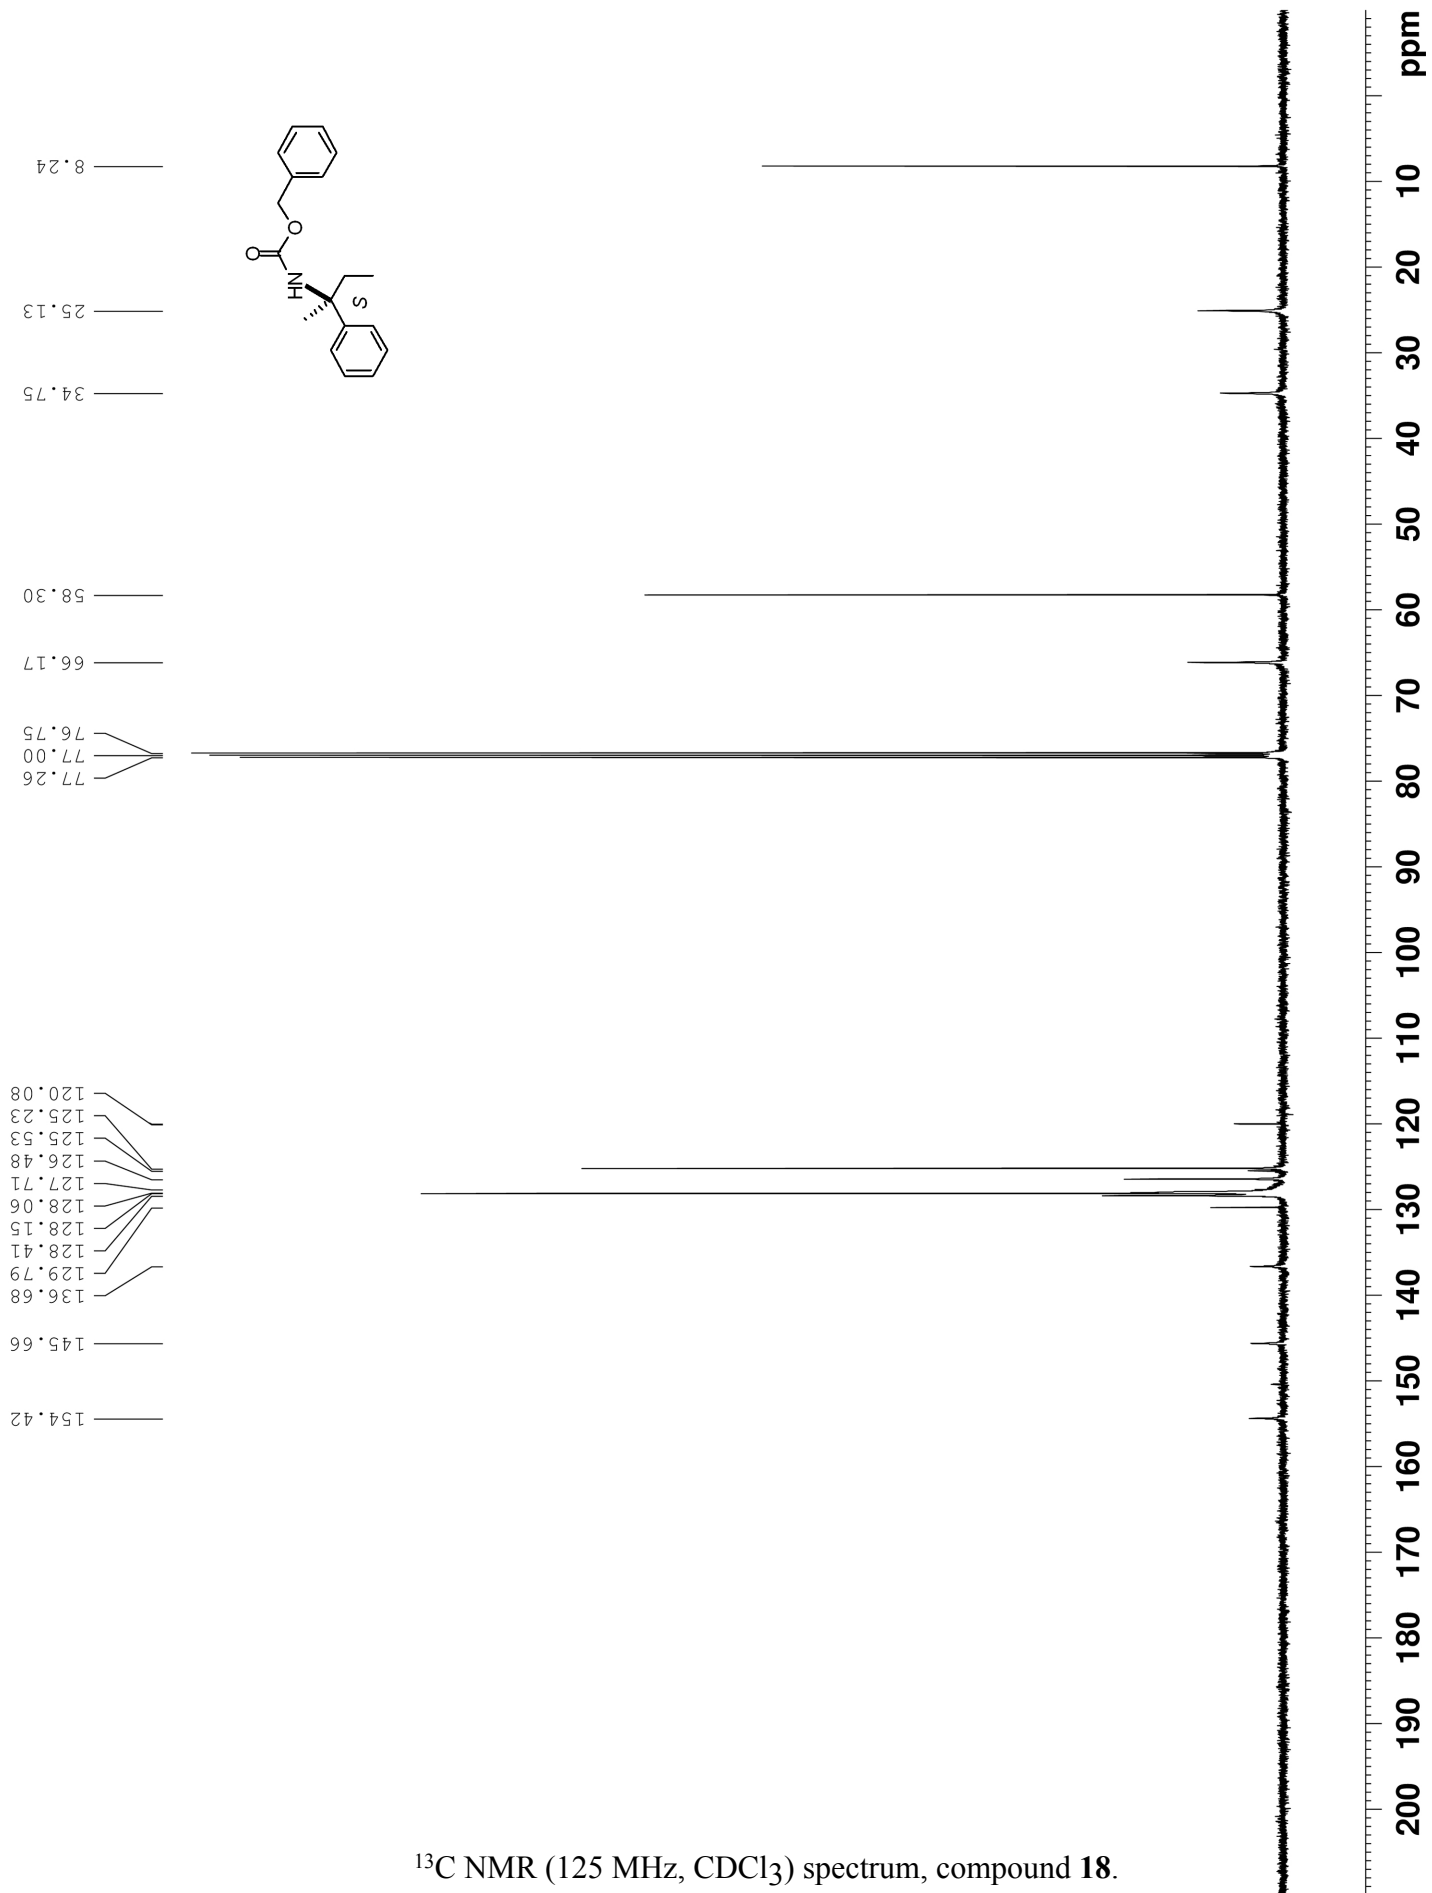



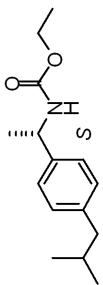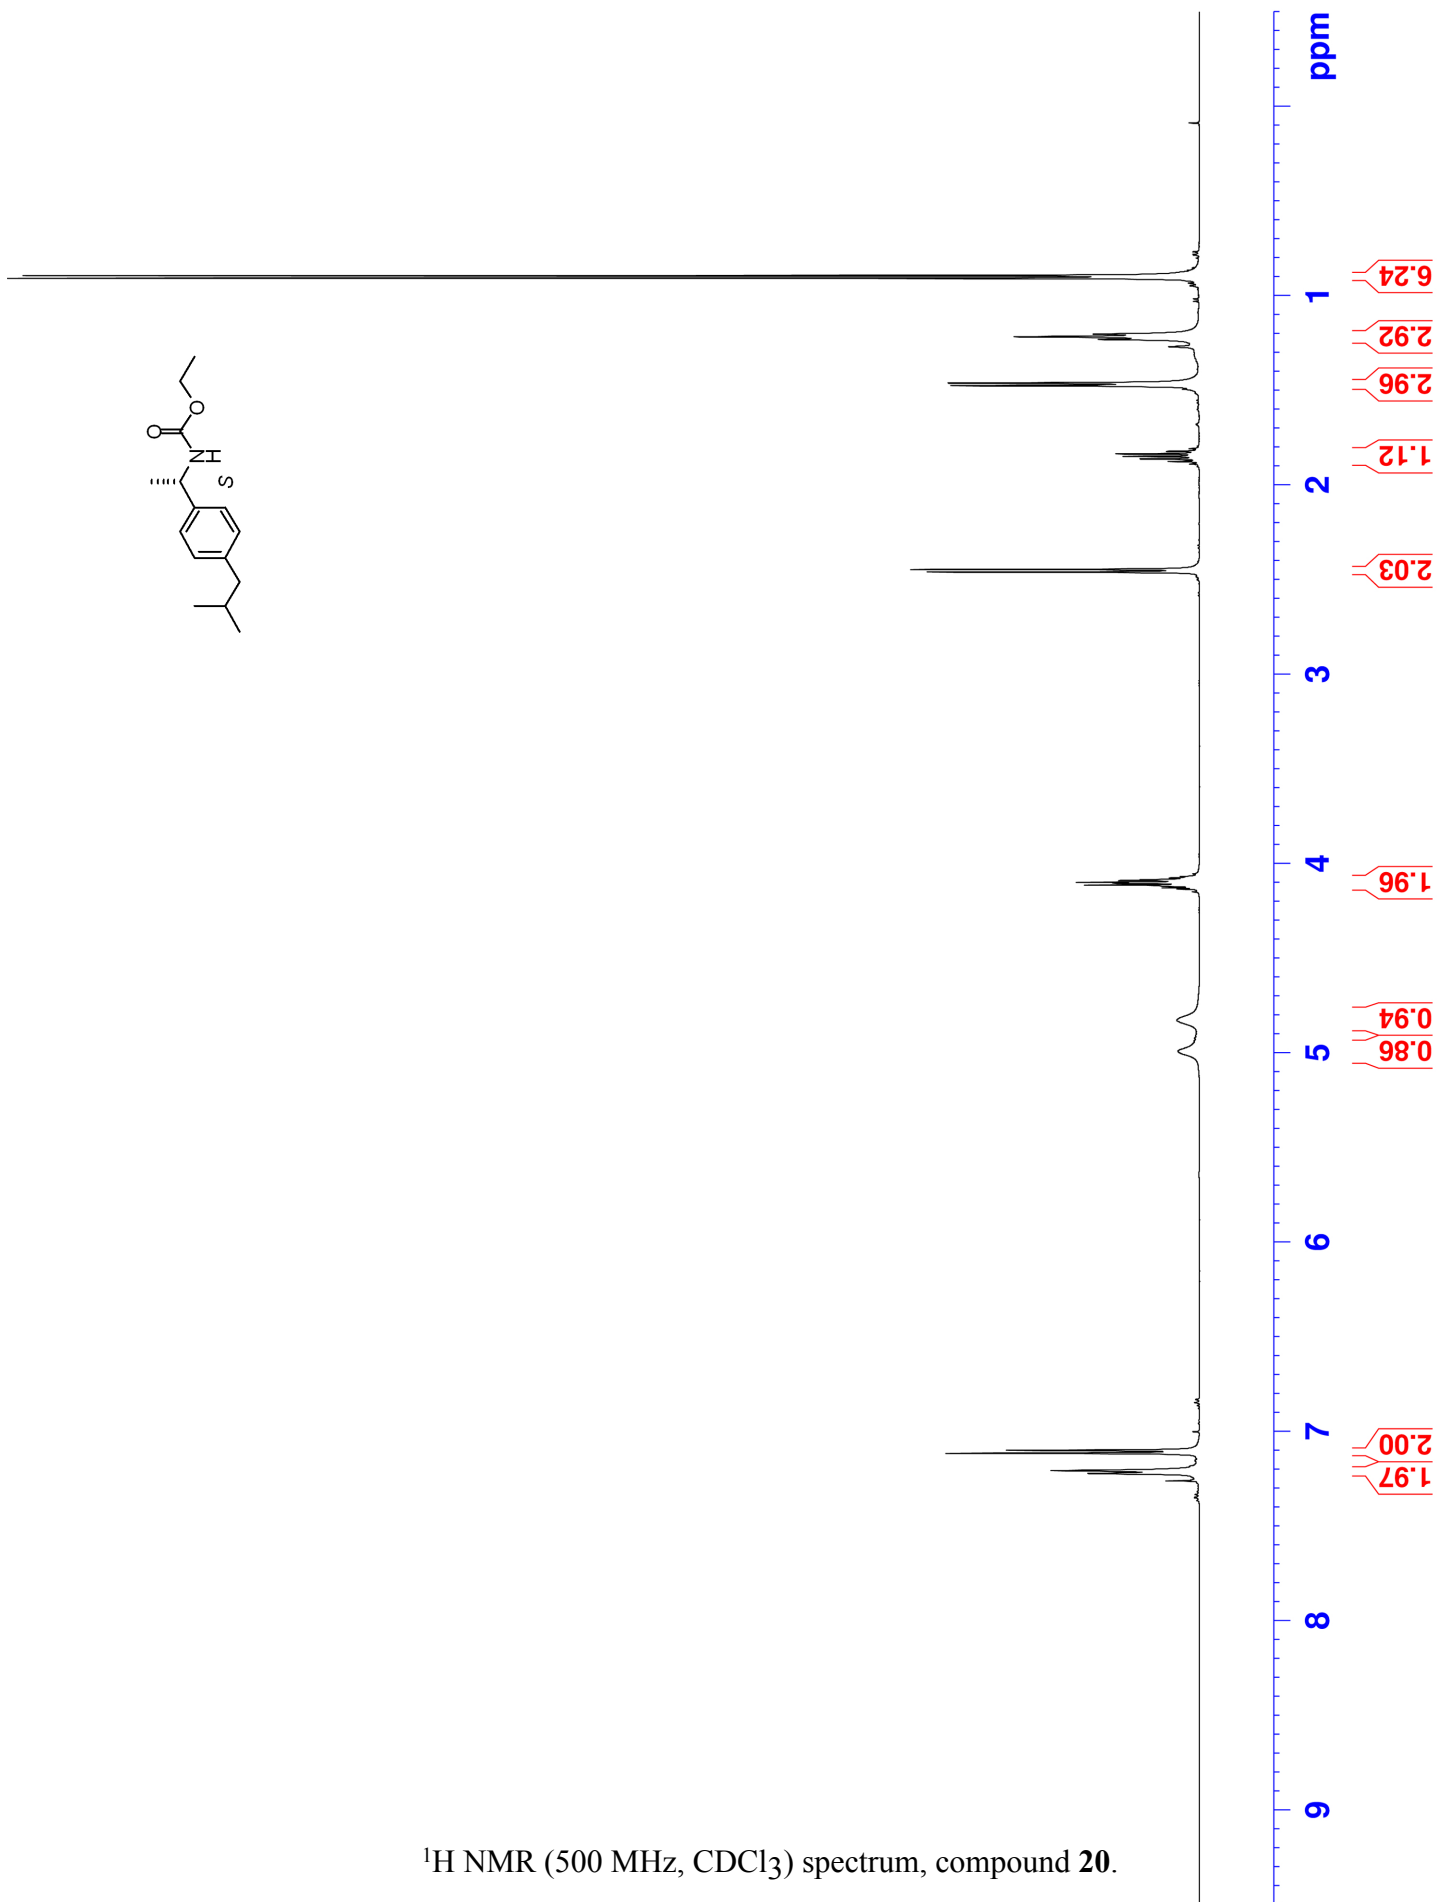

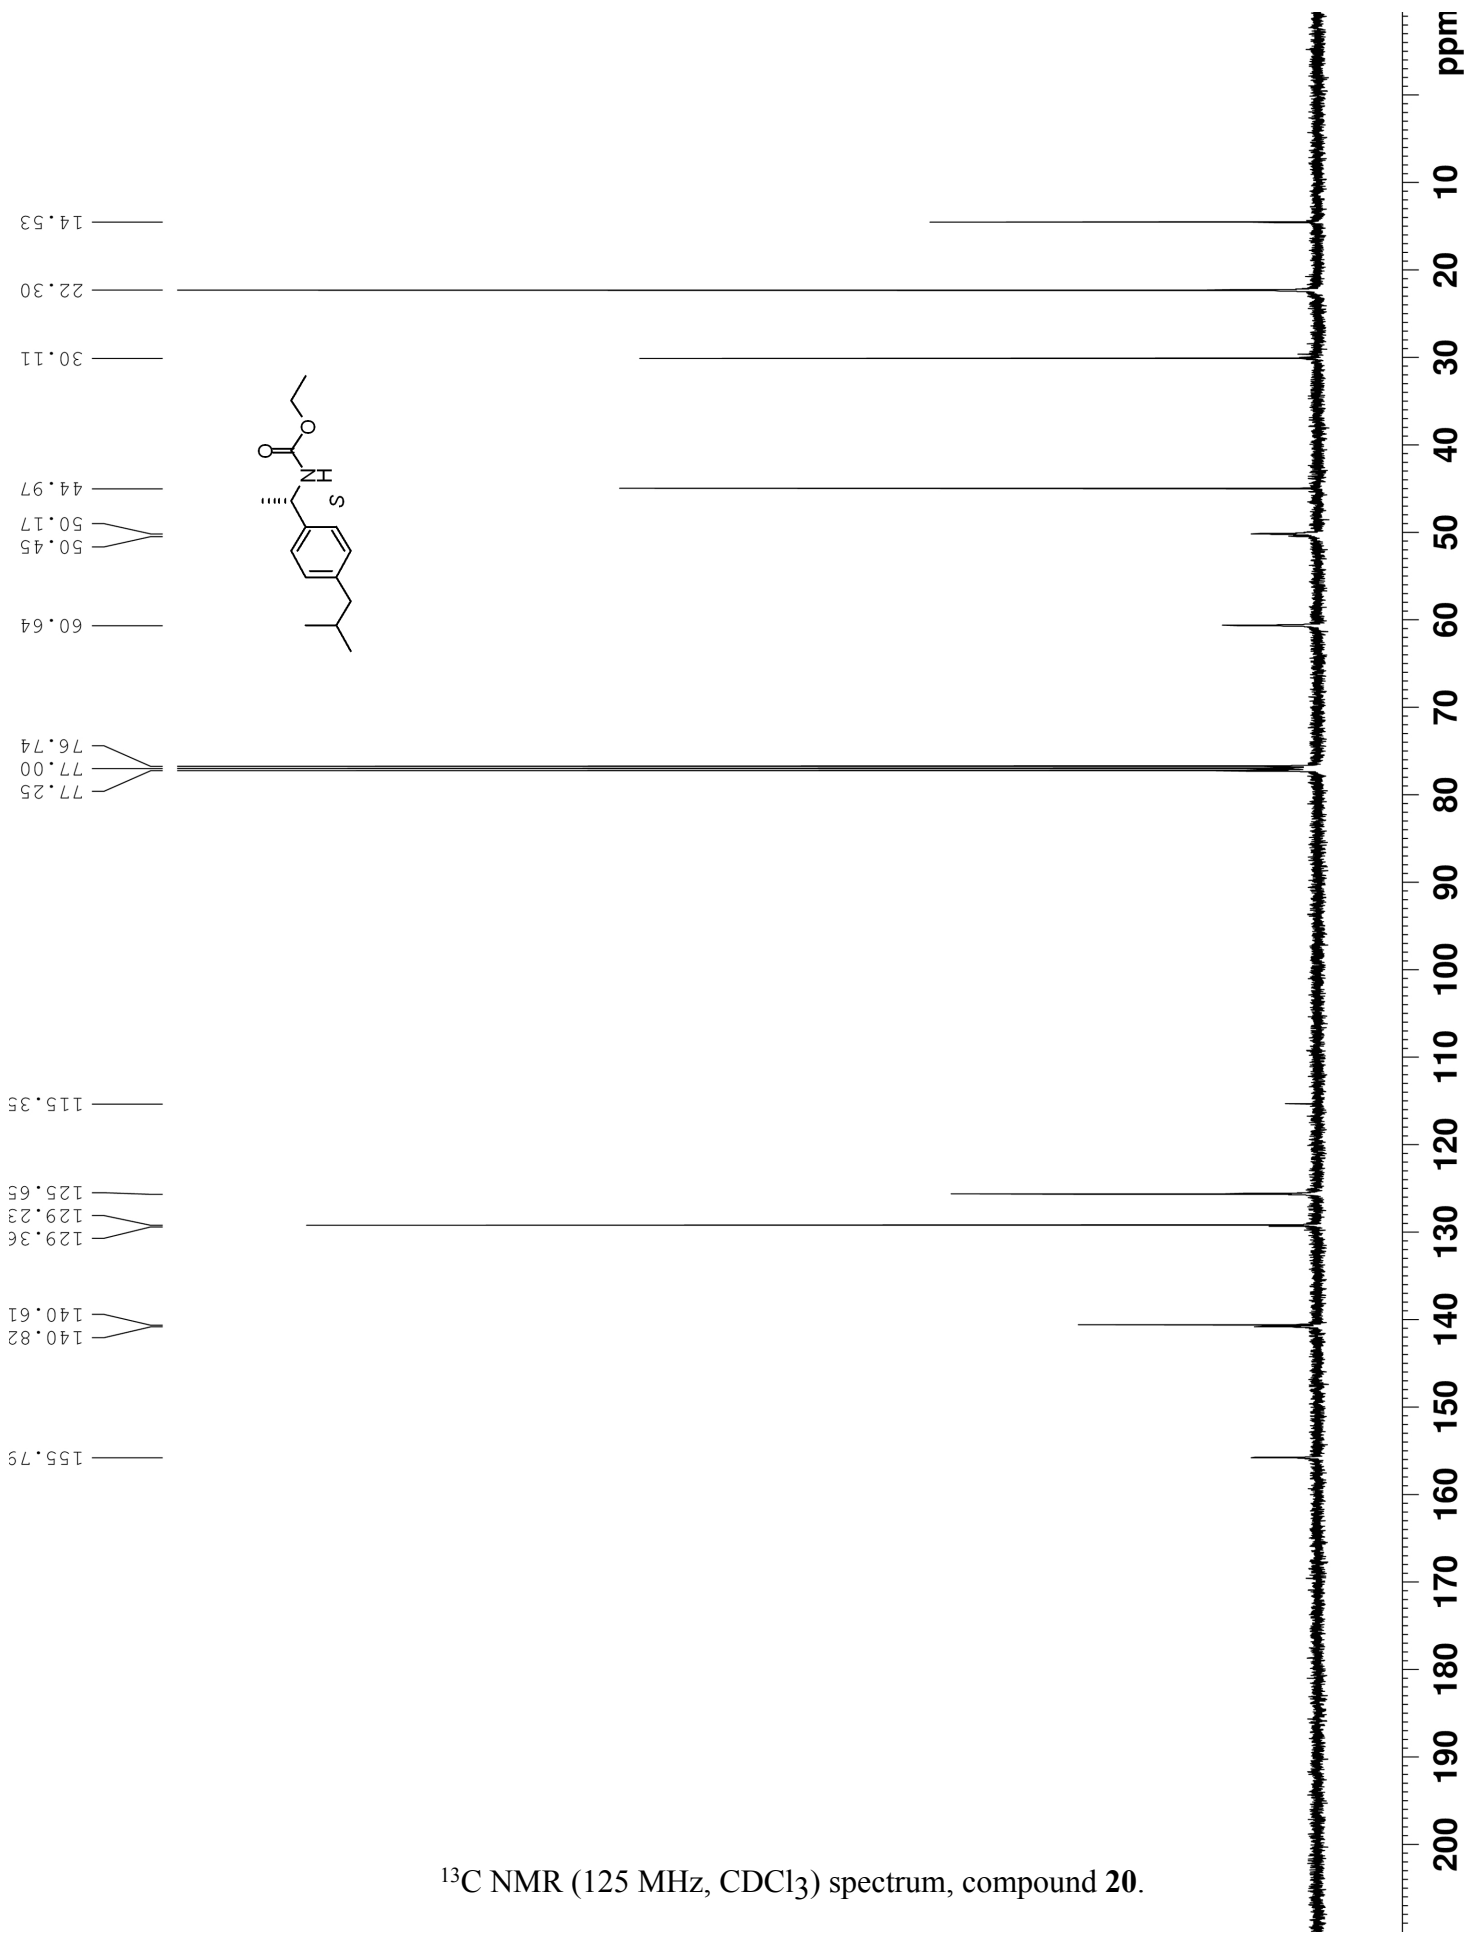

$^{13}\text{C}$  NMR (125 MHz,  $\text{CDCl}_3$ ) spectrum, compound 20.

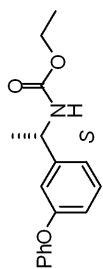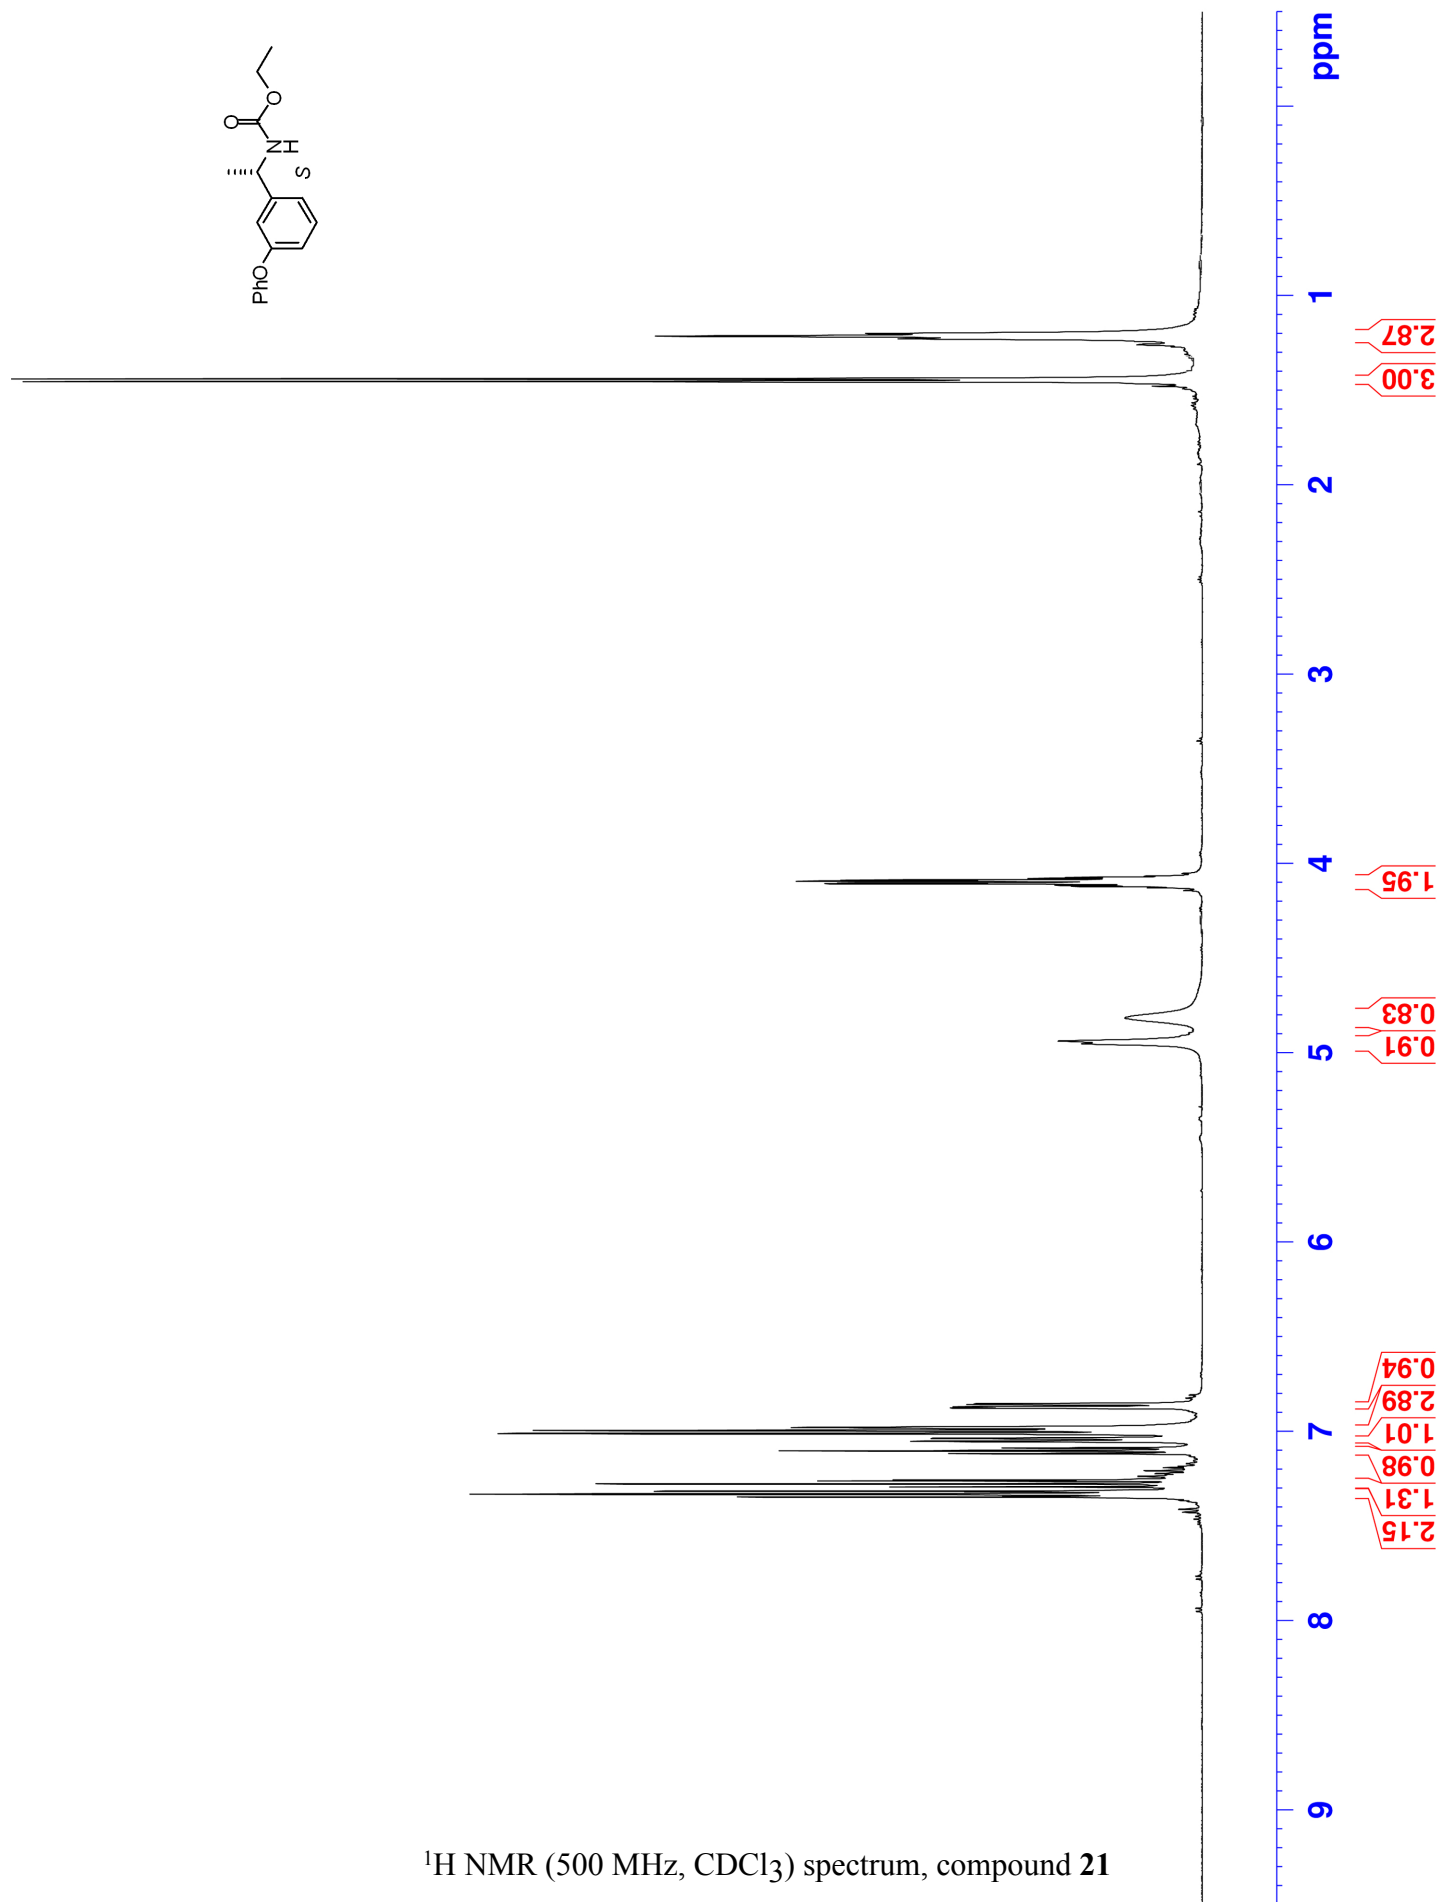

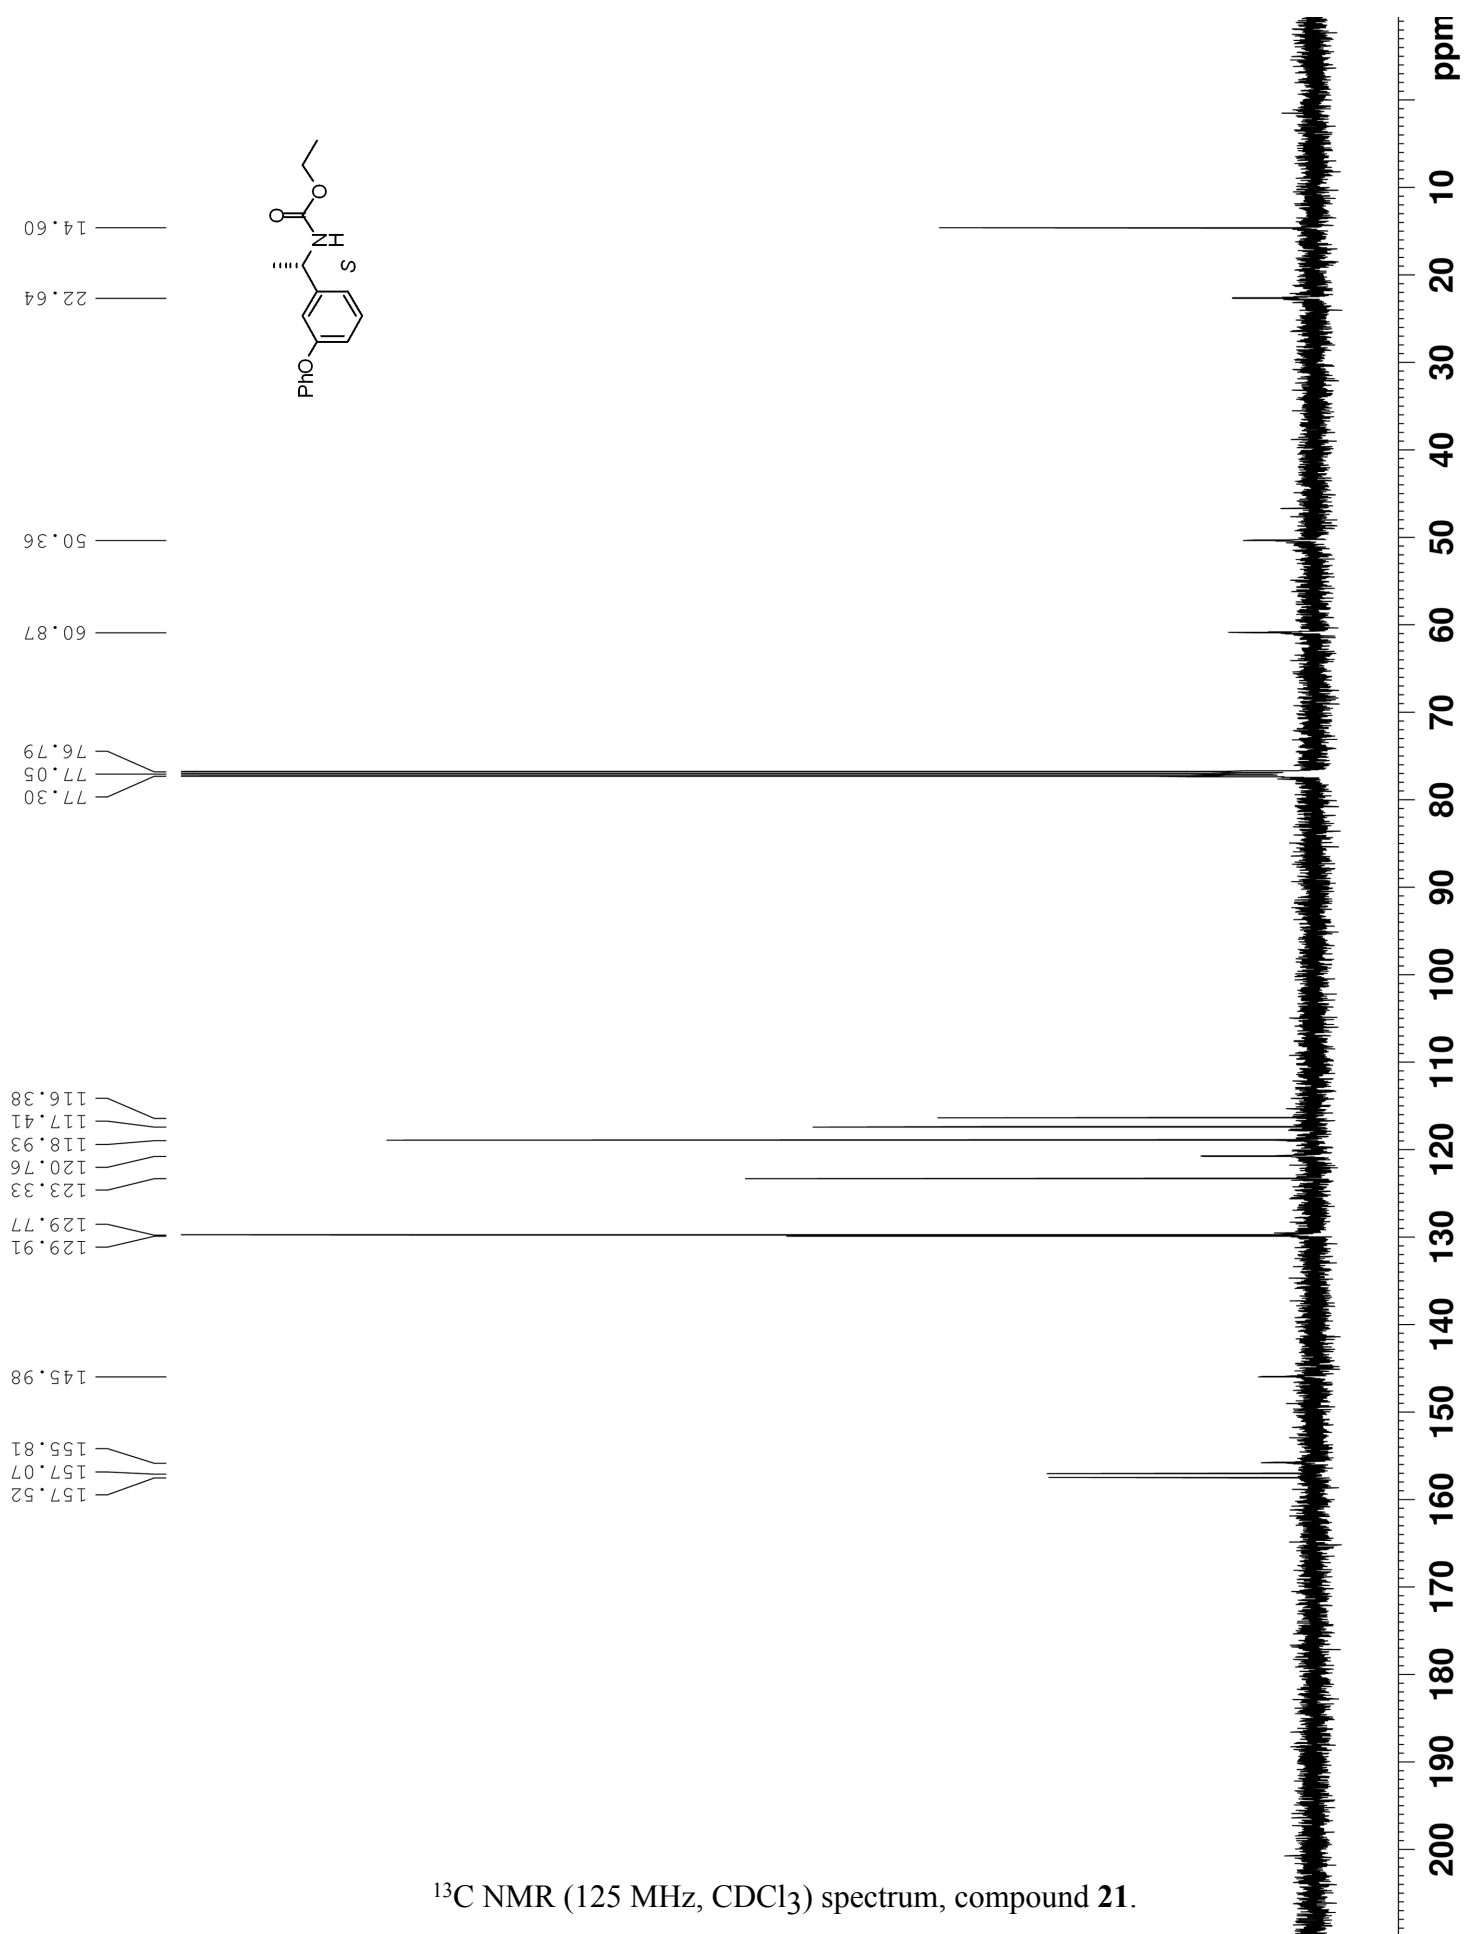

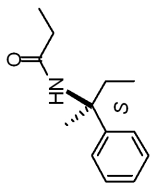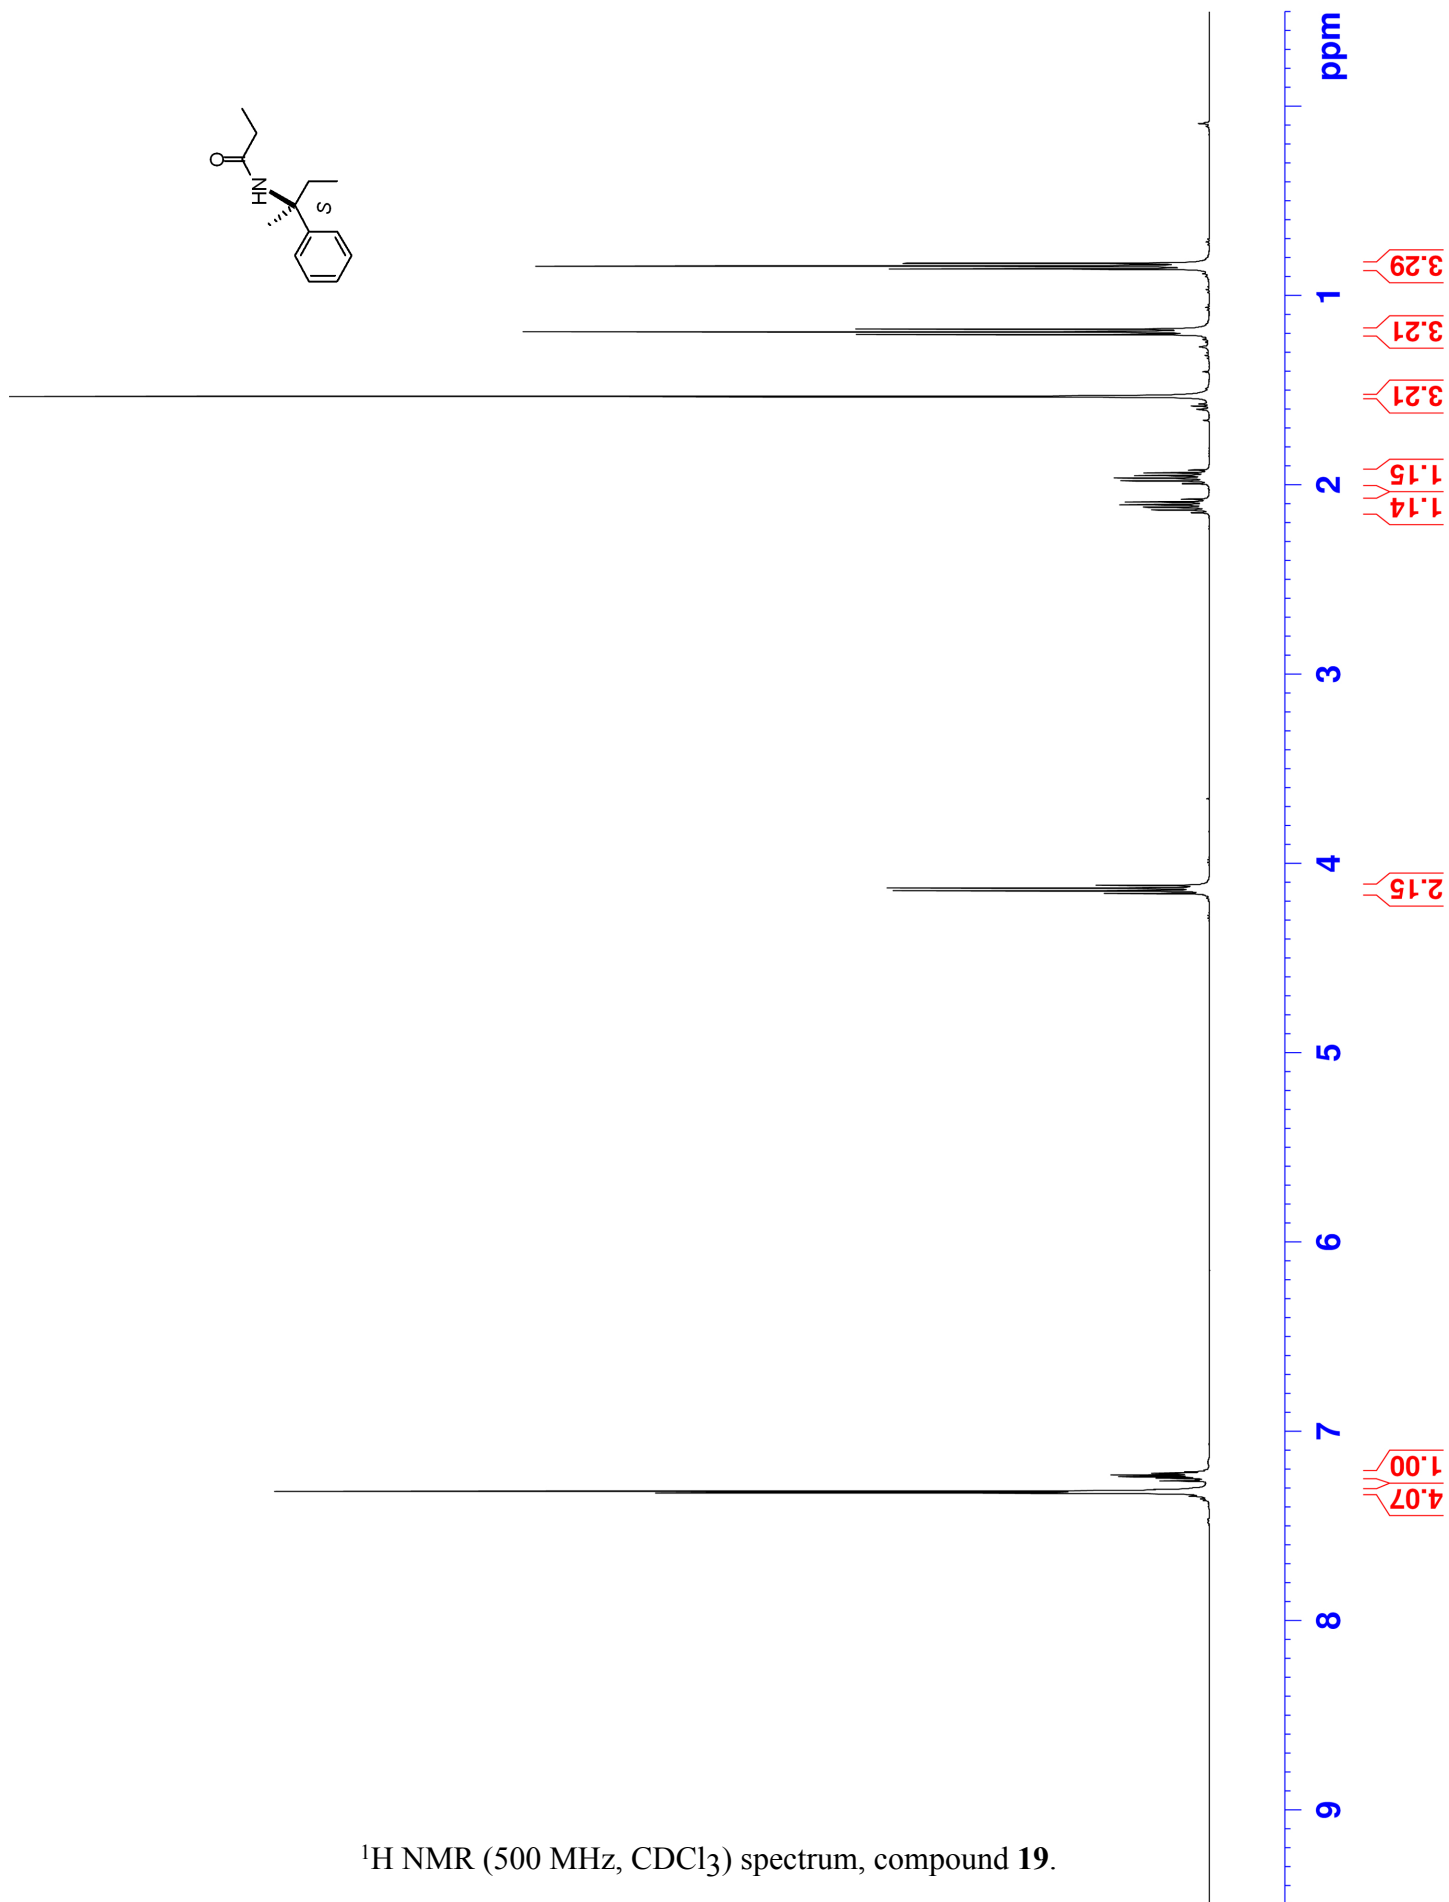

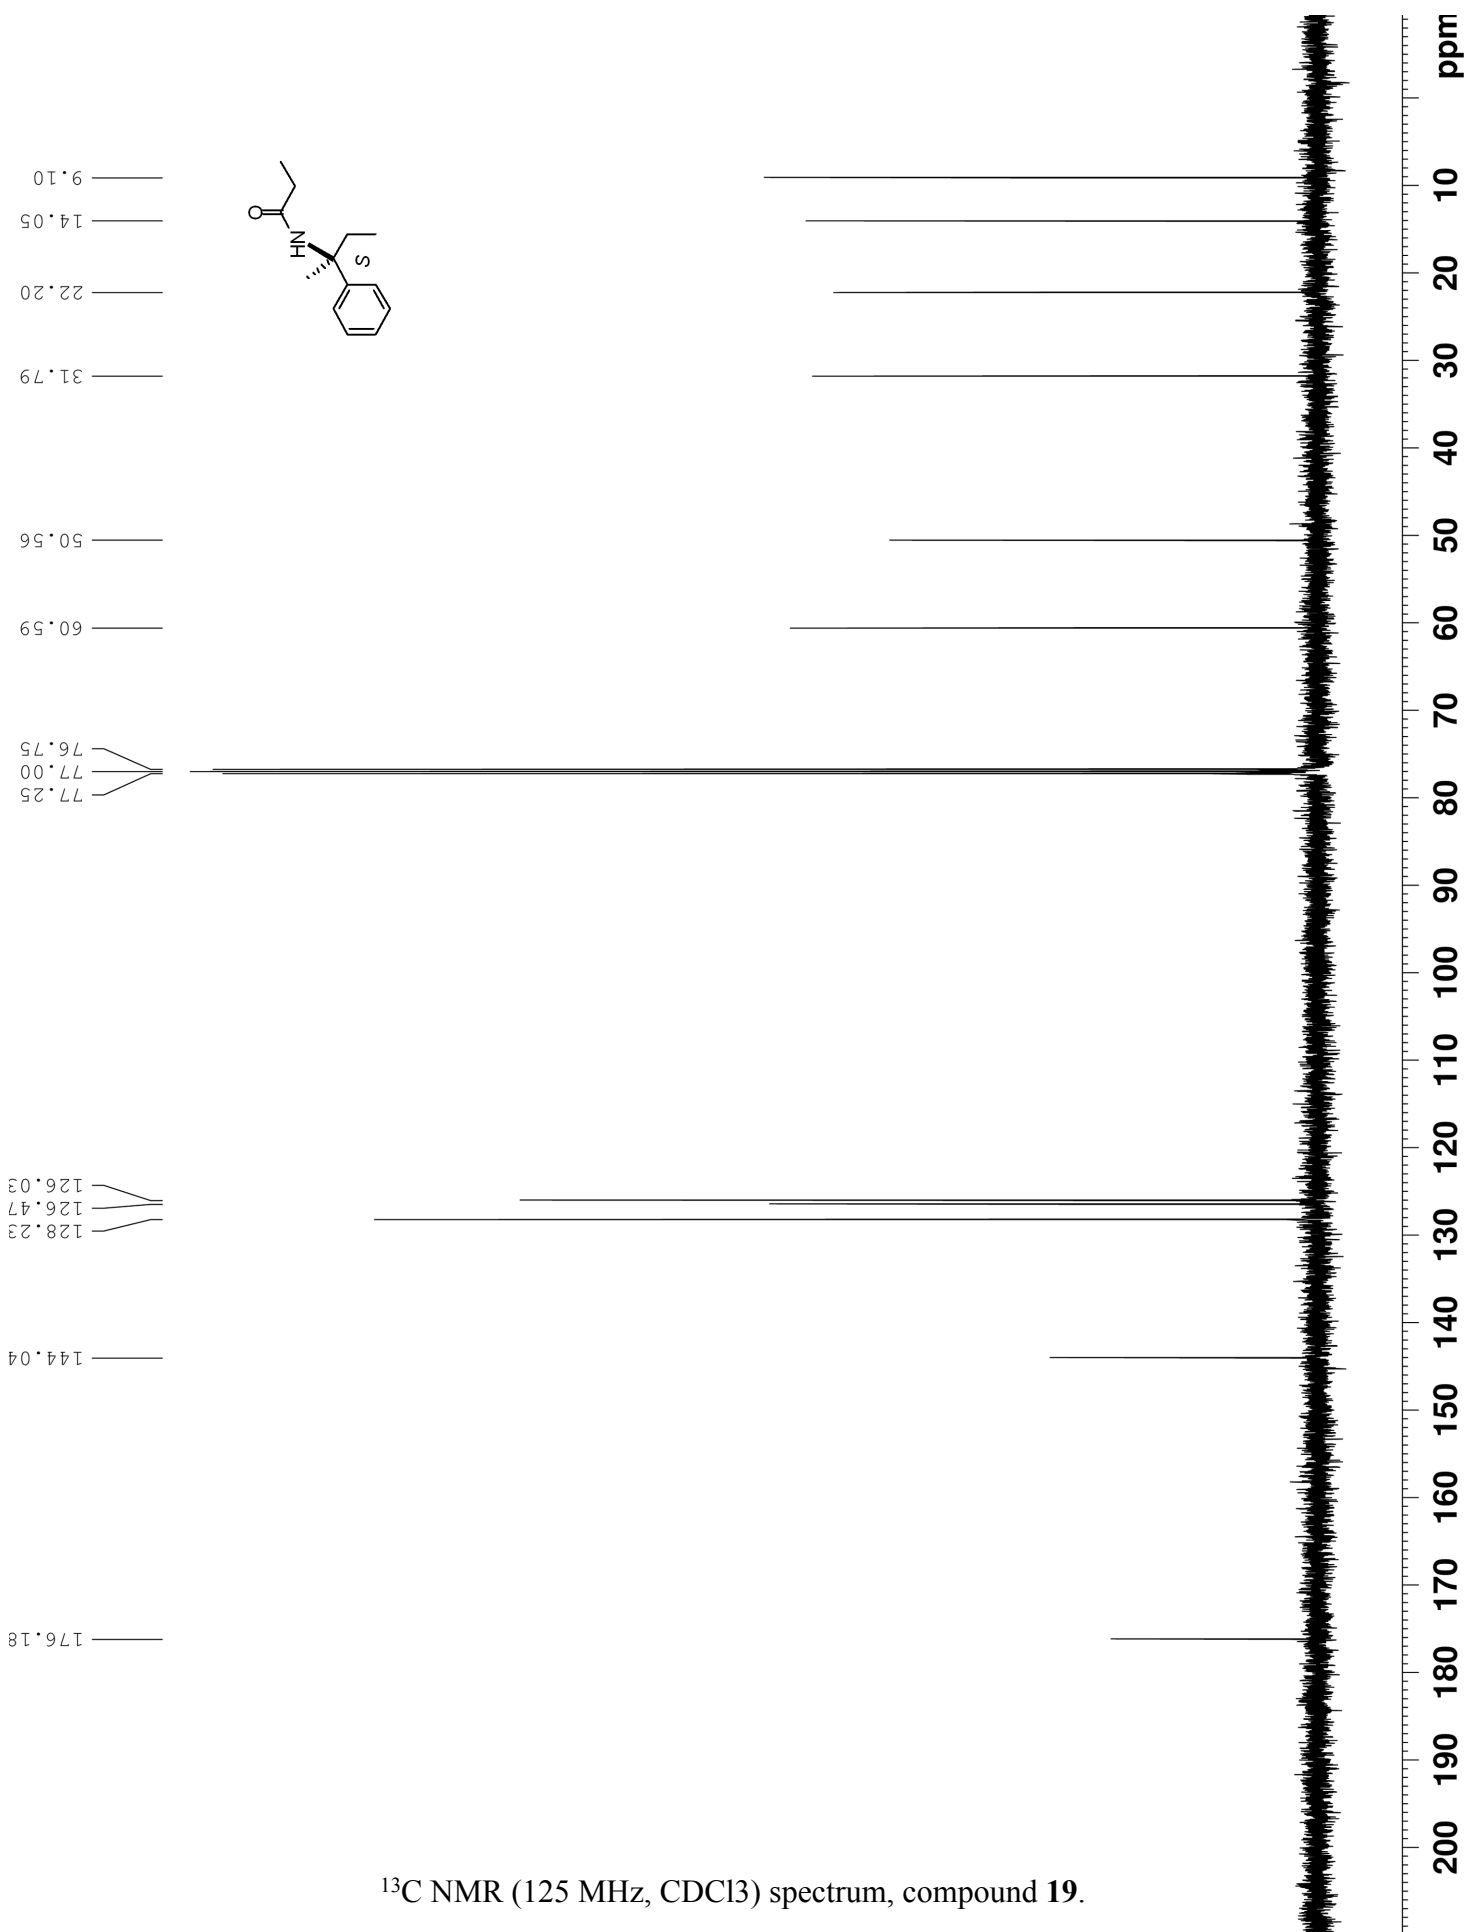

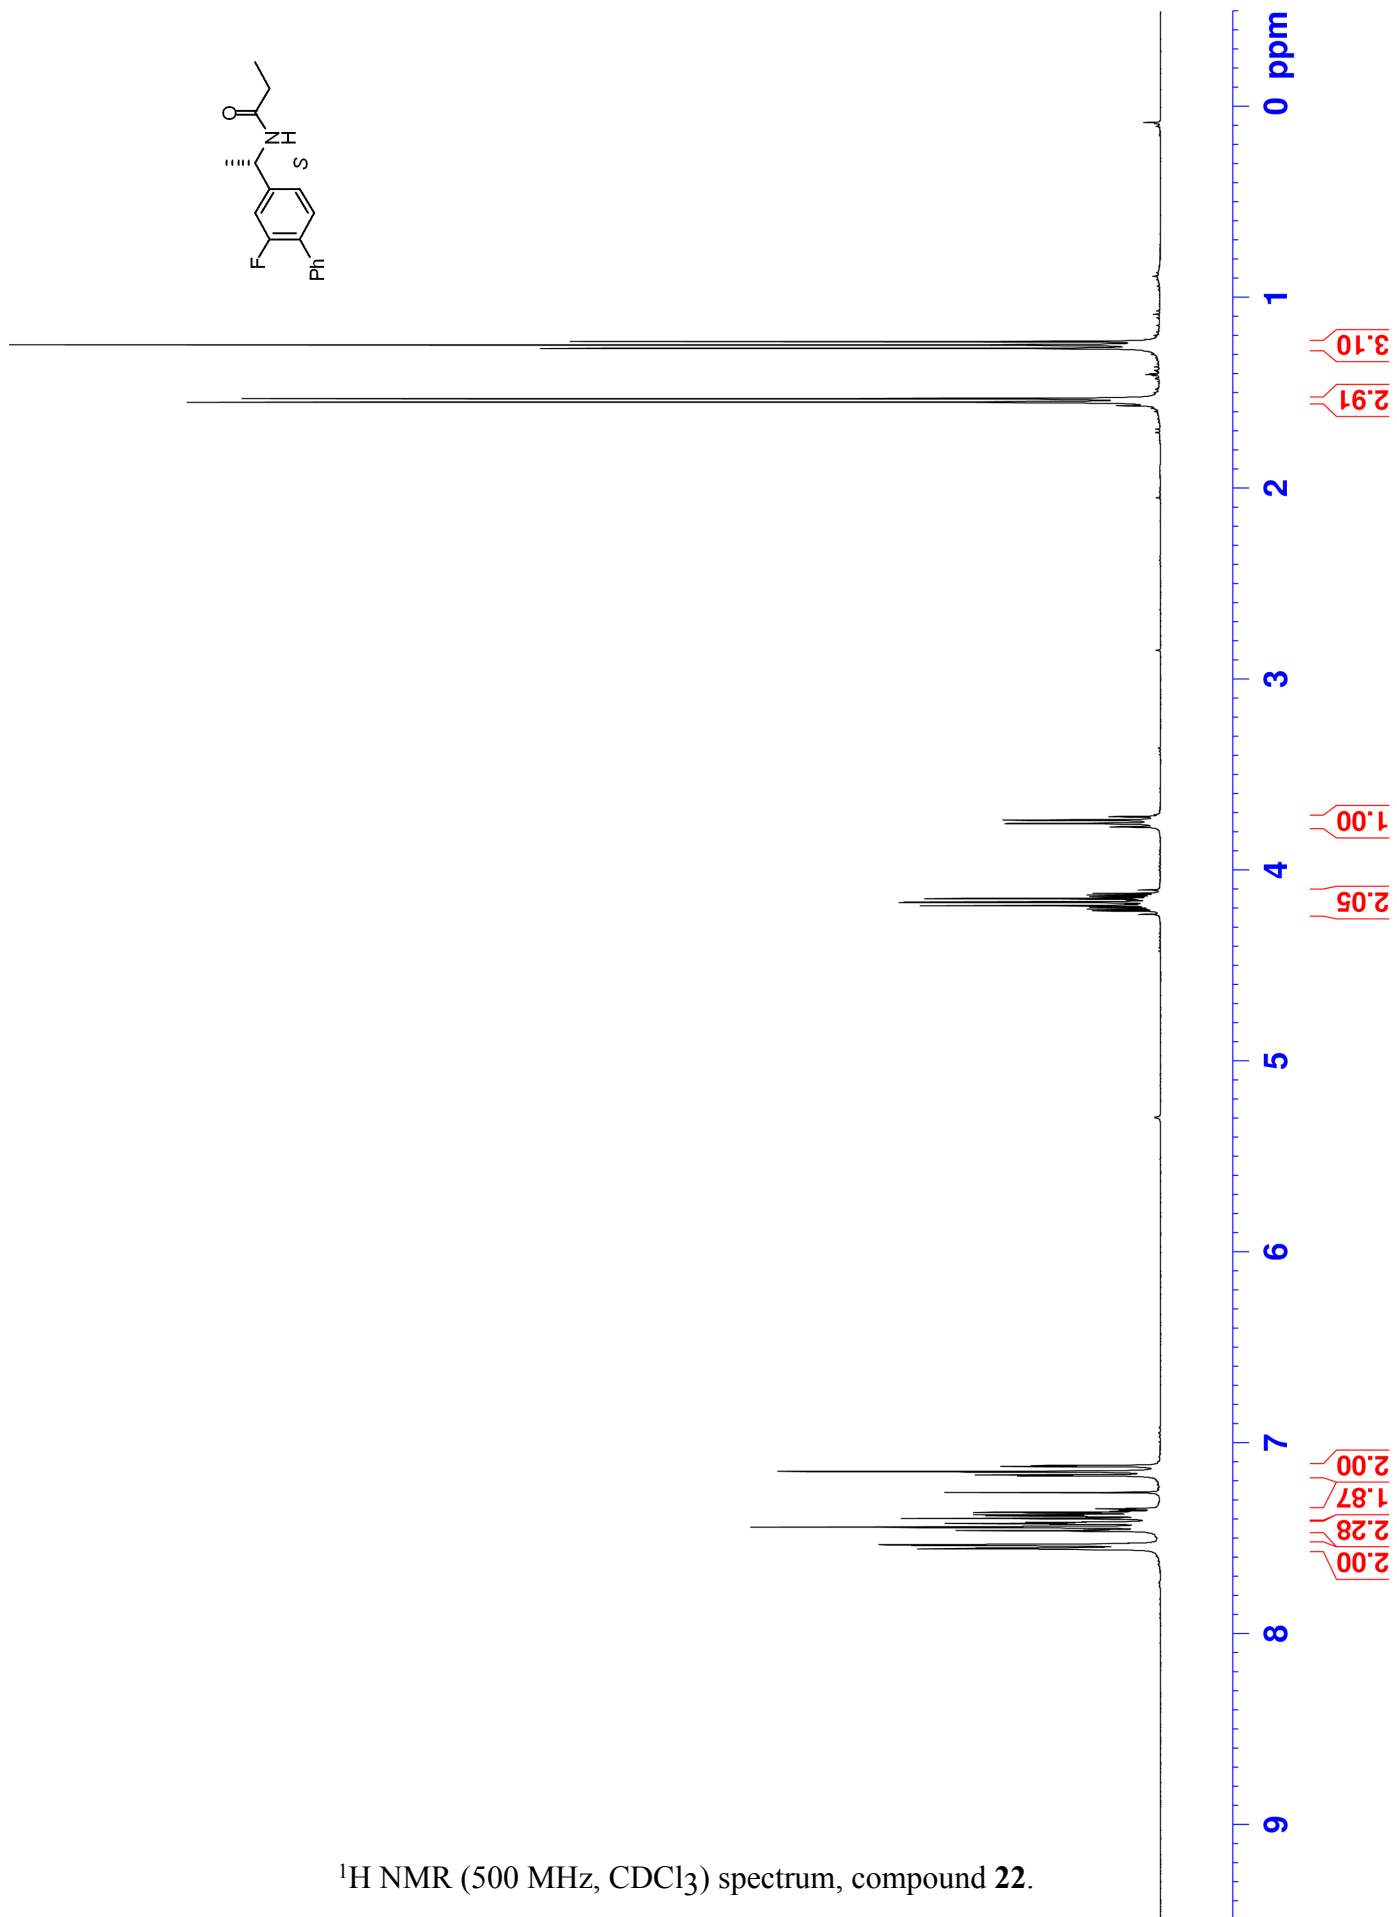

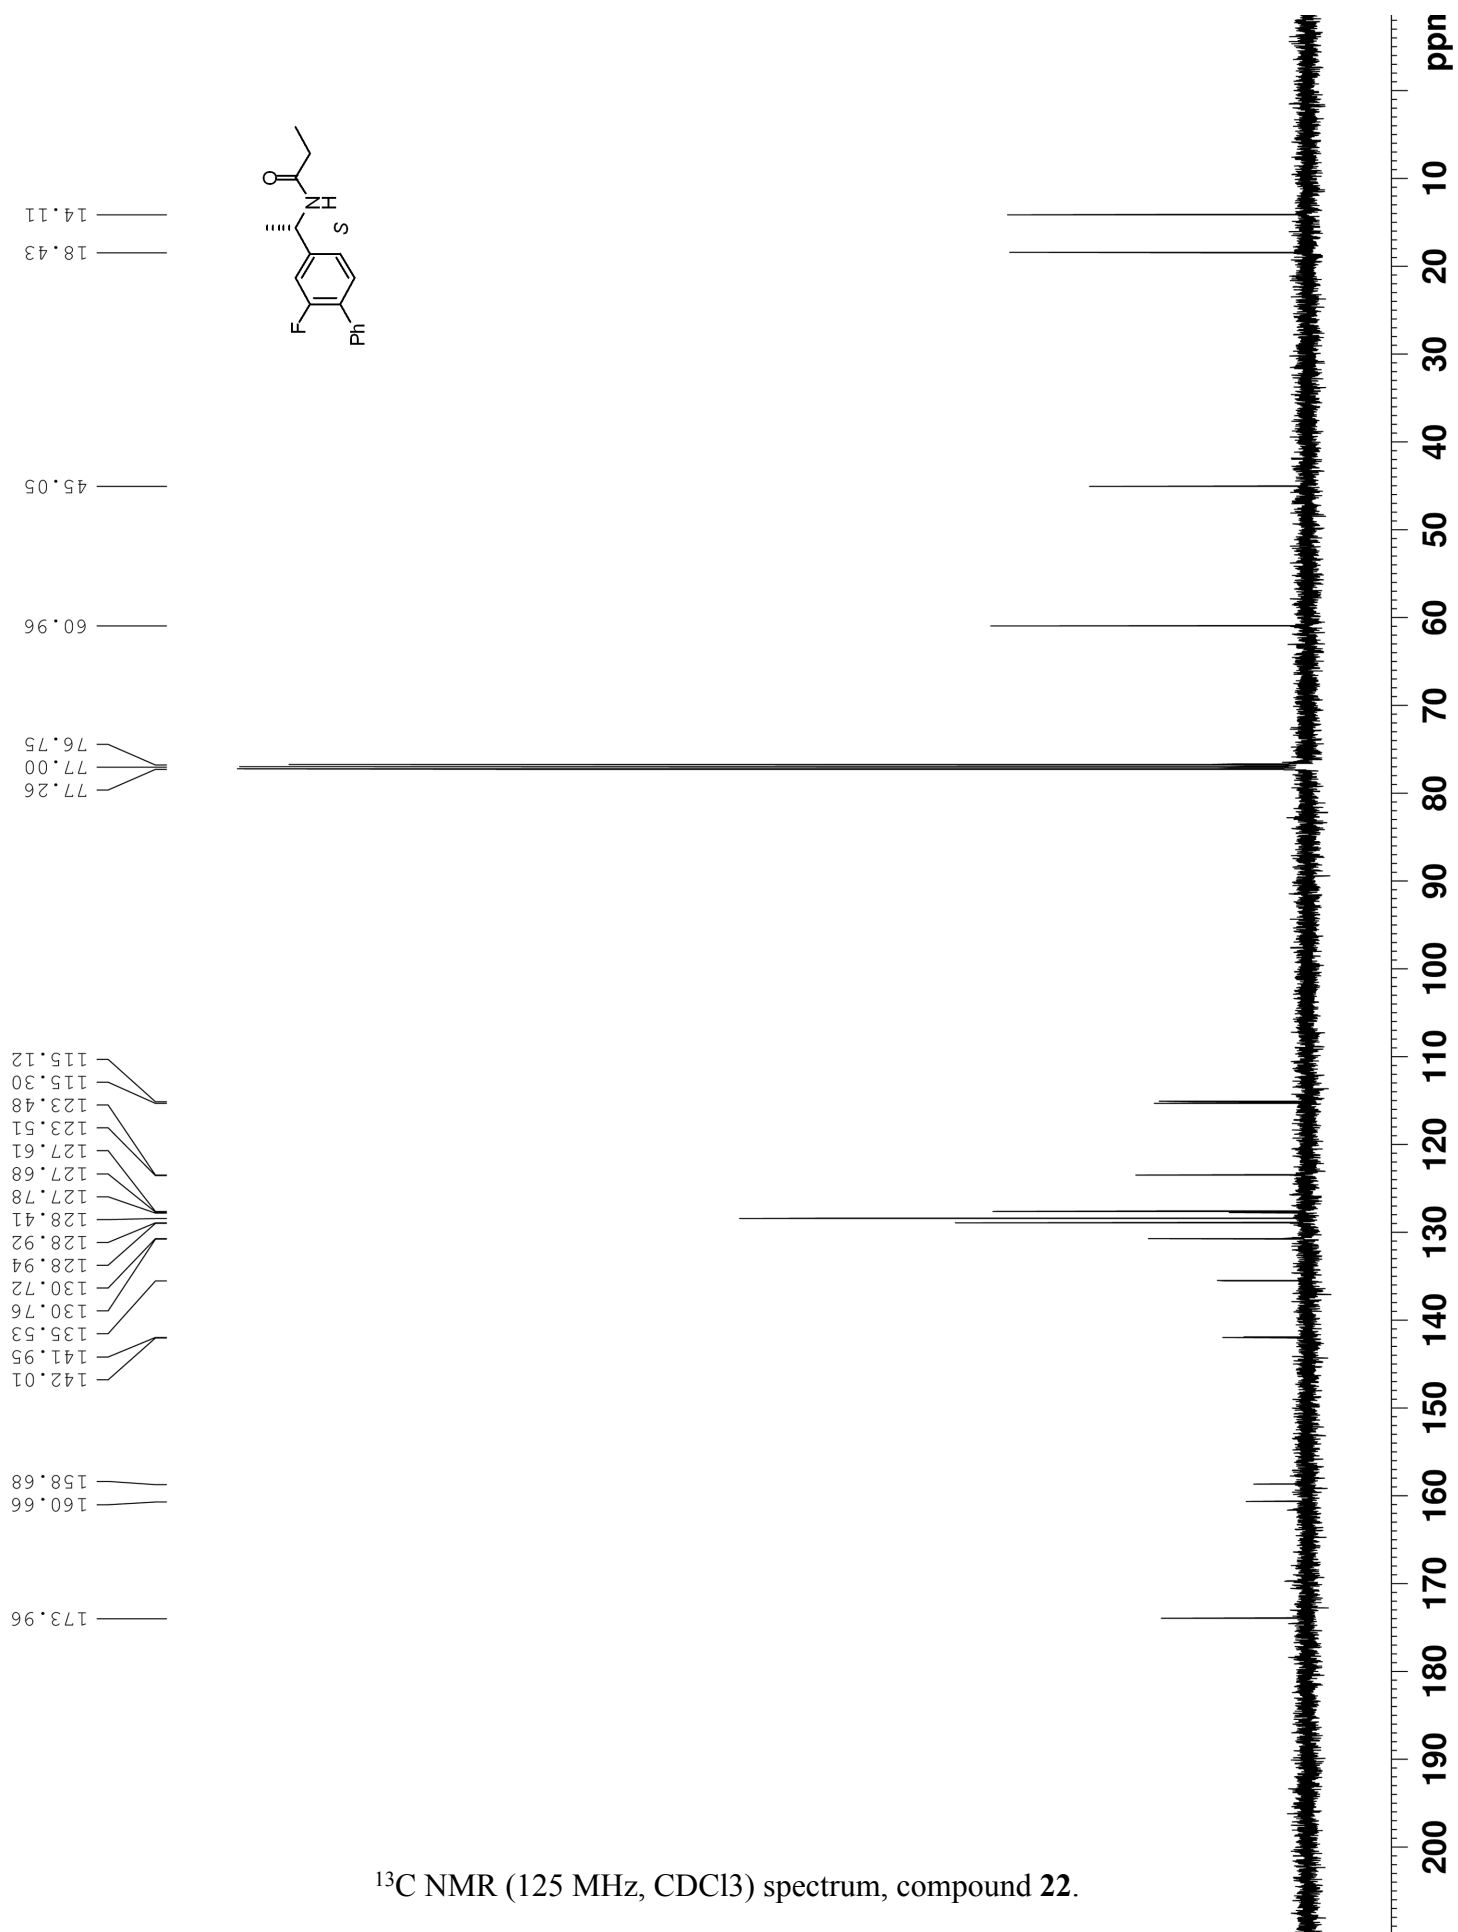



File : c:\users\craig\Cs5209.3  
 Method : c:\class-vp\methods\C-0%05.met  
 Sample ID : CS-5-209-rac-3  
 Acquired : Nov 24, 2008 12:40:06  
 Printed : Nov 24, 2008 13:41:09  
 User : System

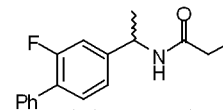

c:\users\craig\Cs5209.3 - Channel A

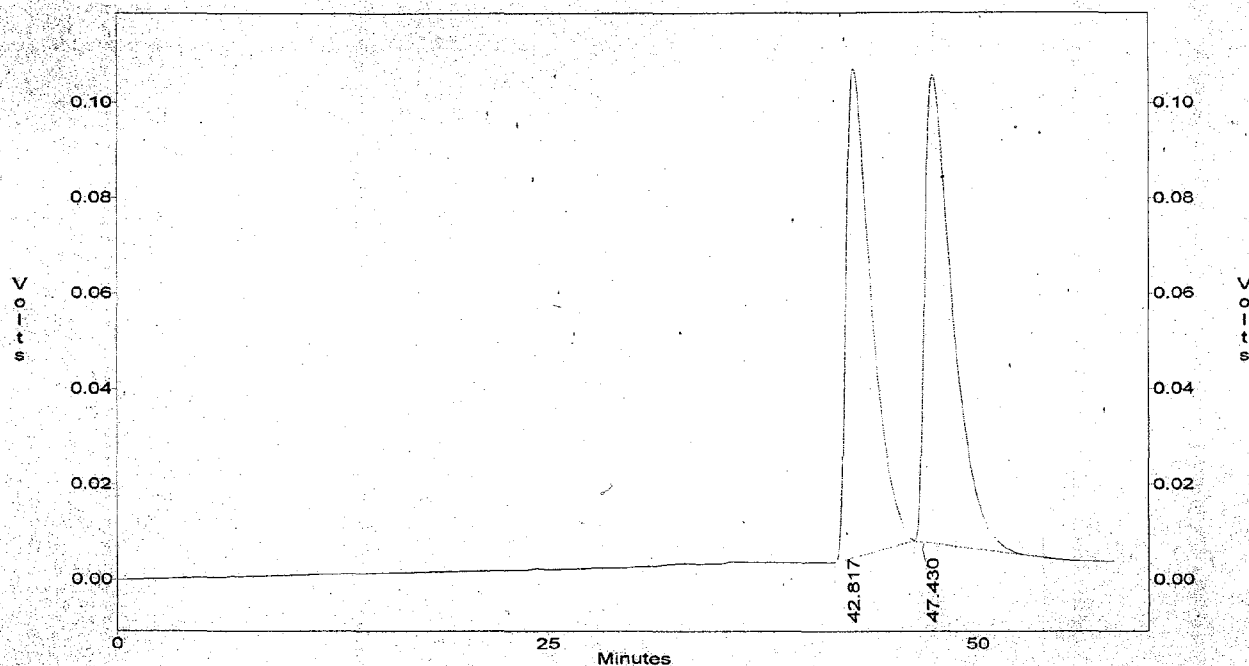

Channel A Results

| Peak     | Time  | Area     | Area %  |
|----------|-------|----------|---------|
| 1        | 42.82 | 10484576 | 48.830  |
| 2        | 47.43 | 10986850 | 51.170  |
| Totals : |       | 21471426 | 100.000 |

Chiral HPLC (racemic mixture): hexanes  
 60 min at 0.50 mL/min, compound 22.

File : c:\users\craig\Cs5209.4  
Method : c:\class-vp\methods\C-0%05.met  
Sample ID : CS-5-209-s-1  
Acquired : Nov 24, 2008 14:07:38  
Printed : Nov 24, 2008 15:08:43  
User : System

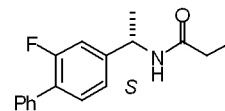

c:\users\craig\Cs5209.4 -- Channel A

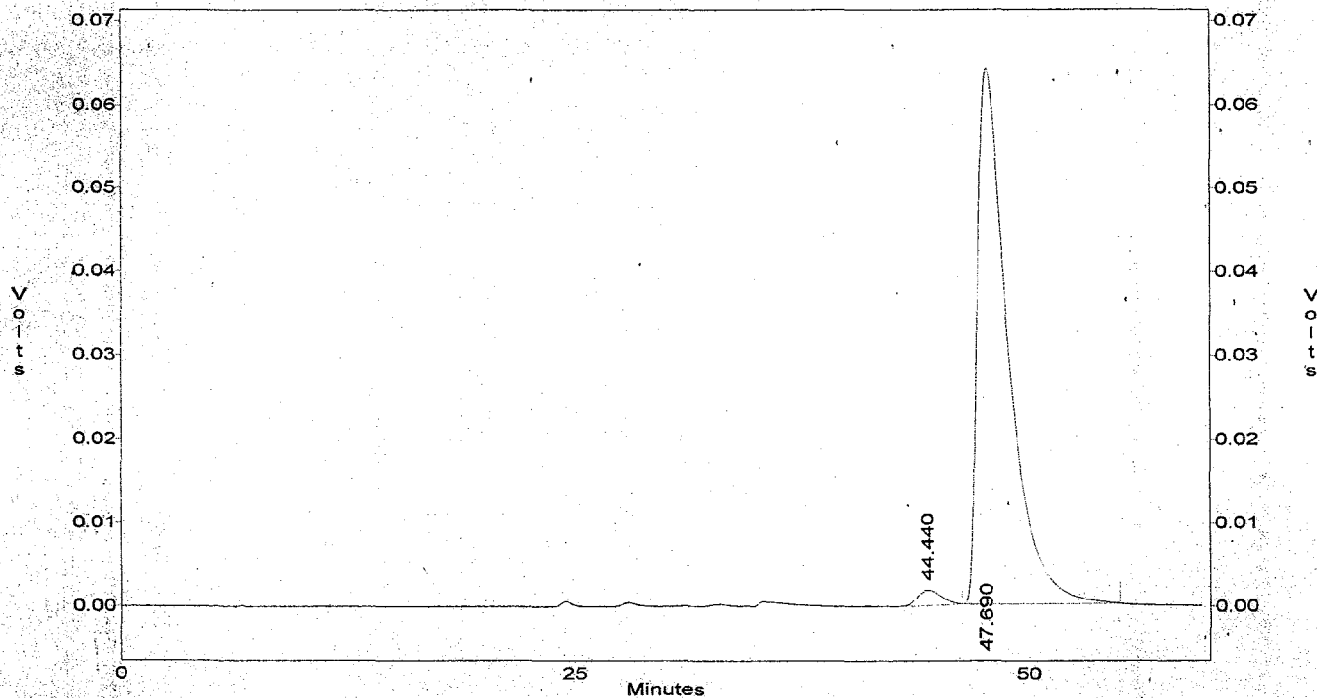

## Channel A Results

| Peak     | Time  | Area    | Area %  |
|----------|-------|---------|---------|
| 1        | 44.44 | 162945  | 2.149   |
| 2        | 47.69 | 7418323 | 97.851  |
| Totals : |       | 7581268 | 100.000 |

Chiral HPLC: hexanes; 60 min at 0.50 mL/min,  
compound 22 from 7.
